# Supplementary material for: Organ-Specific Gene Expression Changes in the Fetal Liver and Placenta in Response to Maternal Folate Depletion
Source: Nutrients. 2016 Oct 22;8(10):661. doi: 10.3390/nu8100661 (PMC5084047; doi:10.3390/nu8100661)
Supplement: Supplementary file 1 [file nutrients-08-00661-s001.xls]

## Sheet: Supplementary Table 1
Supplementary Table 1. Details of manufacturer’s product codes for primers used to determine gene transcript levels by RT-qPCR
Gene Symbol	Organ Validation	Assay ID with Gene Bank Accession number	Qiagen Catalogue Code
Cyp21a1	Placenta	Mm_Cyp21a1_2_SG QuantiTect Primer Assay (NM_009995)	QT01754123
Hbb-y	Placenta	Mm_Hbb-y_1_SG QuantiTect Primer Assay (NM_008221, XM_973830, XM_973898)	QT00156926
Slco1b2	Placenta	Mm_Slco1b2_1_SG QuantiTect Primer Assay (NM_020495, XM_006506963)	QT00158886
Ptgs2	Placenta	Mm_Ptgs2_1_SG QuantiTect Primer Assay (NM_011198)	QT00165347
Vcan	Placenta	Mm_Vcan_1_SG QuantiTect Primer Assay (NM_001081249, NM_001134474, NM_001134475, NM_019389, XM_488510, XM_898904, XM_898910, XM_898918, XM_912905, XM_922534, XM_922547, XM_922553, XM_994134, XM_994146, XM_994169, XM_006517076, XM_006517077, XM_006517078, XM_006517079)	QT00143220
Lrrn4	Placenta	Mm_Lrrn4_1_SG QuantiTect Primer Assay (NM_177303)	QT00174132
Mettl7b	Placenta	Mm_Mettl7b_1_SG QuantiTect Primer Assay (NM_027853)	QT00305410
Asgr1	Liver	Mm_Asgr1_1_SG QuantiTect Primer Assay (200) (NM_009714)	QT00100520
Hamp	Liver	Mm_Hamp_1_SG QuantiTect Primer Assay (200) (NM_032541)	QT00254926
Actc1	Liver	Mm_Actc1_1_SG QuantiTect Primer Assay (200) (NM_009608)	QT00322434
Ckm	Liver	Mm_Ckm_1_SG QuantiTect Primer Assay (200) (NM_007710)	QT00107520
Tnnc2	Liver	Mm_Tnnc2_1_SG QuantiTect Primer Assay (NM_009394)	QT00105196
Smpx	Liver	Mm_Smpx_1_SG QuantiTect Primer Assay (NM_025357, NR_045569)	QT00130760
GAPDH	Normalising transcript	Mm_Gapdh_3_SG QuantiTect Primer Assay (200)(NM_008084, XM_001003314, XM_990238)	QT01658692

## Sheet: Supplementary Table 2
Supplementatry Table 2: List of genes differentially expressed in the fetal liver in reponse to low maternal folate. Genes were considered to be significantly differentially expressed in response to low maternal folate if (a) the p value for t-test between dietary groups was < 0.05 and (b) if there was a fold change of ±1.2.
Gene Symbol	Gene Name	Fold change in reponse to low folate	P value	Affy ID	Entrez ID	Ensembl ID	RefSeq
Actc1	actin, alpha, cardiac muscle 1	-20.4864	0.00115287	11464_at	11464	ENSMUSG00000068614	NM_009608|NP_033738
Ckm	creatine kinase, muscle	-14.7702	0.00106295	12715_at	12715	ENSMUSG00000030399	NM_007710|NP_031736
Tnnc2	troponin C2, fast	-13.9871	0.0149071	21925_at	21925	ENSMUSG00000017300	NM_009394|NP_033420
Smpx	small muscle protein, X-linked	13.4042	0.000699635	66106_at	66106	ENSMUSG00000041476	NM_025357|NP_079633
Tnni2	troponin I, skeletal, fast 2	-9.06582	0.0163758	21953_at	21953	ENSMUSG00000031097	NM_009405|NP_033431
Actn2	actinin alpha 2	-8.63456	0.00142041	11472_at	11472	ENSMUSG00000052374	NM_033268|NP_150371
Atp1b4	ATPase, (Na+)/K+ transporting, beta 4 polypeptide	-7.85737	0.00938119	67821_at	67821	ENSMUSG00000016327	NM_133690|NP_598451
Tnnt3	troponin T3, skeletal, fast	-7.63908	0.0165441	21957_at	21957	ENSMUSG00000061723	NM_001163664|NM_001163665|NM_001163666|NM_001163667|NM_001163668|NM_001163669|NM_001163670|NM_011620|NP_001157136|NP_001157137|NP_001157138|NP_001157139|NP_001157140|NP_001157141|NP_001157142|NP_035750
Eno3	enolase 3, beta muscle	-7.51688	0.00259077	13808_at	13808	ENSMUSG00000060600	NM_001136062|NM_007933|NP_001129534|NP_031959
Tnni1	troponin I, skeletal, slow 1	-7.23994	0.00759048	21952_at	21952	ENSMUSG00000026418	NM_001112702|NM_021467|NP_001106173|NP_067442
Myh8	myosin, heavy polypeptide 8, skeletal muscle, perinatal	-6.9346	0.0242357	17885_at	17885	ENSMUSG00000055775	NM_177369|NP_796343
Casq2	calsequestrin 2	-6.6725	0.000777879	12373_at	12373	ENSMUSG00000027861	NM_009814|NP_033944
Mybpc1	myosin binding protein C, slow-type	-6.61236	0.021971	109272_at	109272	ENSMUSG00000020061	NM_175418|NP_780627
Myh3	myosin, heavy polypeptide 3, skeletal muscle, embryonic	-6.56845	0.0152085	17883_at	17883	ENSMUSG00000020908	NM_001099635|NP_001093105
Ldb3	LIM domain binding 3	-6.31325	0.00156414	24131_at	24131	ENSMUSG00000021798	NM_001039071|NM_001039072|NM_001039073|NM_001039074|NM_001039075|NM_001039076|NM_011918|NP_001034160|NP_001034161|NP_001034162|NP_001034163|NP_001034164|NP_001034165|NP_036048
Mylpf	myosin light chain, phosphorylatable, fast skeletal muscle	-6.12581	0.0212614	17907_at	17907	ENSMUSG00000030672	NM_016754|NP_058034
Sln	sarcolipin	-6.01137	0.017175	66402_at	66402	ENSMUSG00000042045	NM_025540|NP_079816
Myl4	myosin, light polypeptide 4	-5.3624	0.00494419	17896_at	17896	ENSMUSG00000061086	NM_010858|NP_034988
Ckmt2	creatine kinase, mitochondrial 2	-4.90013	0.00647934	76722_at	76722	ENSMUSG00000021622	NM_198415|NP_940807
Myot	myotilin	-4.62145	0.0139579	58916_at	58916	ENSMUSG00000024471	NM_001033621|NP_001028793
Csrp3	cysteine and glycine-rich protein 3	-4.28544	0.0173051	13009_at	13009	ENSMUSG00000030470	NM_001198841|NM_013808|NP_001185770|NP_038836
Srl	sarcalumenin	-4.11853	0.00519315	106393_at	106393	ENSMUSG00000022519	NM_175347|NP_780556
Pgam2	phosphoglycerate mutase 2	-3.5949	0.0149462	56012_at	56012	ENSMUSG00000020475	NM_018870|NP_061358
Atp2a1	ATPase, Ca++ transporting, cardiac muscle, fast twitch 1	-3.55662	0.0416034	11937_at	11937	ENSMUSG00000030730	NM_007504|NP_031530
Tnnt1	troponin T1, skeletal, slow	-3.36004	0.0230678	21955_at	21955	ENSMUSG00000064179	NM_011618|NP_035748
Sh3bgr	SH3-binding domain glutamic acid-rich protein	-3.06024	0.00217777	50795_at	50795	ENSMUSG00000040666	NM_015825|NP_056640
Itgb1bp2	integrin beta 1 binding protein 2	-2.90831	0.022771	26549_at	26549	ENSMUSG00000031312	NM_013712|NP_038740
Cdh11	cadherin 11	-2.55819	0.011894	12552_at	12552	ENSMUSG00000031673	NM_009866|NP_033996
Crh	corticotropin releasing hormone	-2.46553	0.0356369	12918_at	12918	ENSMUSG00000049796	NM_205769|NP_991338
Fhl1	four and a half LIM domains 1	-2.46474	0.00226358	14199_at	14199	ENSMUSG00000023092	NM_001077361|NM_001077362|NM_010211|NP_001070829|NP_001070830|NP_034341
Apobec2	apolipoprotein B mRNA editing enzyme, catalytic polypeptide 2	-2.42653	0.0087319	11811_at	11811	ENSMUSG00000040694	NM_009694|NP_033824
Egfl6	EGF-like-domain, multiple 6	-2.42028	0.00381092	54156_at	54156	ENSMUSG00000000402	NM_019397|NP_062270
Myom1	myomesin 1	-2.38151	0.0294371	17929_at	17929	ENSMUSG00000024049	NM_001083934|NM_010867|NP_001077403|NP_034997
Mlf1	myeloid leukemia factor 1	-2.30849	0.0198655	17349_at	17349	ENSMUSG00000048416	NM_001039543|NM_010801|NP_001034632|NP_034931
Cav2	caveolin 2	-2.28197	0.00134041	12390_at	12390	ENSMUSG00000000058	NM_016900|NP_058596
Shh	sonic hedgehog	-2.24638	0.0184484	20423_at	20423	ENSMUSG00000002633	NM_009170|NP_033196
Slit2	slit homolog 2 (Drosophila)	-2.23296	0.00276961	20563_at	20563	ENSMUSG00000031558	NM_178804|NP_848919
Rps6ka6	ribosomal protein S6 kinase polypeptide 6	-2.06904	0.0342093	67071_at	67071	ENSMUSG00000025665	NM_025949|NP_080225
Scn7a	sodium channel, voltage-gated, type VII, alpha	-2.06409	0.020295	20272_at	20272	ENSMUSG00000034810	NM_009135|NP_033161
Sparcl1	SPARC-like 1	-2.05888	0.0122226	13602_at	13602	ENSMUSG00000029309	NM_010097|NP_034227
Kbtbd10	kelch repeat and BTB (POZ) domain containing 10	-1.99155	0.00588815	228003_at	228003	ENSMUSG00000075307	NM_001081087|NP_001074556
Dpt	dermatopontin	-1.97071	0.00736096	56429_at	56429	ENSMUSG00000026574	NM_019759|NP_062733
Fbn2	fibrillin 2	-1.96432	0.0200798	14119_at	14119	ENSMUSG00000024598	NM_010181|NP_034311
Slc34a2	solute carrier family 34 (sodium phosphate), member 2	-1.95046	0.040905	20531_at	20531	ENSMUSG00000029188	NM_011402|NP_035532
Emcn	endomucin	-1.89261	0.00987962	59308_at	59308	ENSMUSG00000054690	NM_001163522|NM_016885|NP_001156994|NP_058581
Gjc1	gap junction protein, gamma 1	-1.87184	0.00694068	14615_at	14615	ENSMUSG00000034520	NM_001159382|NM_001159383|NM_008122|NP_001152854|NP_001152855|NP_032148
Gpx8	glutathione peroxidase 8 (putative)	-1.84379	0.00291993	69590_at	69590	ENSMUSG00000021760	NM_027127|NP_081403
Igf1	insulin-like growth factor 1	-1.83918	0.0120215	16000_at	16000	ENSMUSG00000020053	NM_001111274|NM_001111275|NM_001111276|NM_010512|NM_184052|NP_001104744|NP_001104745|NP_001104746|NP_034642|NP_908941
Cd34	CD34 antigen	-1.83772	0.0158143	12490_at	12490	ENSMUSG00000016494	NM_001111059|NM_133654|NP_001104529|NP_598415
Irx3	Iroquois related homeobox 3 (Drosophila)	-1.81839	0.0379571	16373_at	16373	ENSMUSG00000031734	NM_008393|NP_032419
Agtr2	angiotensin II receptor, type 2	-1.81445	0.0252068	11609_at	11609	ENSMUSG00000068122	NM_007429|NP_031455
Cox8b	cytochrome c oxidase, subunit VIIIb	-1.80872	0.0492415	12869_at	12869	ENSMUSG00000025488	NM_007751|NP_031777
Fkbp14	FK506 binding protein 14	-1.80495	0.00489489	231997_at	231997	ENSMUSG00000038074	NM_153573|NP_705801
Ogn	osteoglycin	-1.79115	0.00251498	18295_at	18295	ENSMUSG00000021390	NM_008760|NP_032786
Trdn	triadin	-1.77742	0.00080227	76757_at	76757	ENSMUSG00000019787	NM_029726|NP_084002
Serpine2	serine (or cysteine) peptidase inhibitor, clade E, member 2	-1.76846	0.0112258	20720_at	20720	ENSMUSG00000026249	NM_009255|NP_033281
Pdpn	podoplanin	-1.73764	0.000615457	14726_at	14726	ENSMUSG00000028583	NM_010329|NP_034459
Mterf	mitochondrial transcription termination factor	-1.72346	0.0293676	545725_at	545725	ENSMUSG00000040429	NM_001013023|NM_172135|NP_001013041|NP_742147
Unc45b	unc-45 homolog B (C. elegans)	-1.70485	0.0103767	217012_at	217012	ENSMUSG00000018845	NM_178680|NP_848795
Cd200	CD200 antigen	-1.69663	0.011208	17470_at	17470	ENSMUSG00000022661	NM_010818|NP_034948
Fbxo11	F-box protein 11	-1.67851	0.0408124	225055_at	225055	ENSMUSG00000005371	NM_001081034|NP_001074503
Mef2c	myocyte enhancer factor 2C	-1.64804	0.00195736	17260_at	17260	ENSMUSG00000005583	NM_001170537|NM_025282|NP_001164008|NP_079558
Podxl	podocalyxin-like	-1.64228	0.00106756	27205_at	27205	ENSMUSG00000025608	NM_013723|NP_038751
Postn	periostin, osteoblast specific factor	-1.6384	0.00275399	50706_at	50706	ENSMUSG00000027750	NM_001198765|NM_001198766|NM_015784|NP_001185694|NP_001185695|NP_056599
Rab40b	Rab40b, member RAS oncogene family	-1.63795	0.00389657	217371_at	217371	ENSMUSG00000025170	NM_139147|NP_631886
Phldb2	pleckstrin homology-like domain, family B, member 2	-1.6365	0.00605238	208177_at	208177	ENSMUSG00000033149	NM_153412|NP_700461
Hoxa5	homeobox A5	-1.63382	0.0343225	15402_at	15402	ENSMUSG00000038253	NM_010453|NP_034583
Rnd3	Rho family GTPase 3	-1.63306	0.012731	74194_at	74194	ENSMUSG00000017144	NM_028810|NP_083086
Fkbp3	FK506 binding protein 3	-1.62299	0.0488126	30795_at	30795	ENSMUSG00000020949	NM_013902|NP_038930
Ltbp2	latent transforming growth factor beta binding protein 2	-1.61603	0.0162521	16997_at	16997	ENSMUSG00000002020	NM_013589|NP_038617
Murc	muscle-related coiled-coil protein	-1.60309	0.0180226	68016_at	68016	ENSMUSG00000028348	NM_026509|NP_080785
Top2b	topoisomerase (DNA) II beta	-1.60112	0.0129193	21974_at	21974	ENSMUSG00000017485	NM_009409|NP_033435
Spry2	sprouty homolog 2 (Drosophila)	-1.59756	0.0275808	24064_at	24064	ENSMUSG00000022114	NM_011897|NP_036027
Tgfb2	transforming growth factor, beta 2	-1.5942	0.0219224	21808_at	21808	ENSMUSG00000039239	NM_009367|NP_033393
Clic3	chloride intracellular channel 3	-1.58808	0.0335251	69454_at	69454	ENSMUSG00000015093	NM_027085|NP_081361
Fkbp7	FK506 binding protein 7	-1.58801	0.00595177	14231_at	14231	ENSMUSG00000002732	NM_010222|NP_034352
Capn6	calpain 6	-1.5863	0.001061	12338_at	12338	ENSMUSG00000067276	NM_007603|NP_031629
Ppic	peptidylprolyl isomerase C	-1.57763	0.00136715	19038_at	19038	ENSMUSG00000024538	NM_008908|NP_032934
Atp11a	ATPase, class VI, type 11A	-1.57512	0.0152263	50770_at	50770	ENSMUSG00000031441	NM_015804|NP_056619
Rasa1	RAS p21 protein activator 1	-1.57391	0.017032	218397_at	218397	ENSMUSG00000021549	NM_145452|NP_663427
Foxp2	forkhead box P2	-1.56638	0.0369985	114142_at	114142	ENSMUSG00000029563	NM_053242|NM_212435|NP_444472|NP_997600
Wwtr1	WW domain containing transcription regulator 1	-1.56637	0.0279579	97064_at	97064	ENSMUSG00000027803	NM_001168281|NM_133784|NP_001161753|NP_598545
MARCH6	membrane-associated ring finger (C3HC4) 6	-1.56362	0.0011884	223455_at	223455	ENSMUSG00000039100	NM_172606|NP_766194
Smtnl2	smoothelin-like 2	-1.56243	0.00727035	276829_at	276829	ENSMUSG00000045667	NM_177776|NP_808444
Pfn2	profilin 2	-1.5622	0.00298352	18645_at	18645	ENSMUSG00000027805	NM_019410|NP_062283
Cav3	caveolin 3	-1.55621	0.00505111	12391_at	12391	ENSMUSG00000062694	NM_007617|NP_031643
Rap2a	RAS related protein 2a	-1.55343	0.0125525	76108_at	76108	ENSMUSG00000051615	NM_029519|NP_083795
Pcdh18	protocadherin 18	-1.55288	0.020216	73173_at	73173	ENSMUSG00000037892	NM_130448|NP_569715
Sspn	sarcospan	-1.55074	0.0099882	16651_at	16651	ENSMUSG00000030255	NM_010656|NP_034786
Ptgfrn	prostaglandin F2 receptor negative regulator	-1.54774	0.0111715	19221_at	19221	ENSMUSG00000027864	NM_011197|NP_035327
Prrg3	proline rich Gla (G-carboxyglutamic acid) 3 (transmembrane)	-1.54634	0.000738259	208748_at	208748	ENSMUSG00000033361	NM_001081135|NP_001074604
Slc25a40	solute carrier family 25, member 40	-1.54558	0.0195535	319653_at	319653	ENSMUSG00000054099	NM_178766|NP_848881
Ndn	necdin	-1.54537	0.00520643	17984_at	17984	ENSMUSG00000033585	NM_010882|NP_035012
Cpe	carboxypeptidase E	-1.54138	0.0188482	12876_at	12876	ENSMUSG00000037852	NM_013494|NP_038522
1700113I22Rik	RIKEN cDNA 1700113I22 gene	-1.53713	0.00882924	73635_at	73635	ENSMUSG00000075528	NM_026865|NP_081141
Clic5	chloride intracellular channel 5	-1.53696	0.00154286	224796_at	224796	ENSMUSG00000023959	NM_172621|NP_766209
LOC100503043	hypothetical protein LOC100503043	-1.53439	0.0180622	100503043_at	100503043	ENSMUSG00000049804	XM_003085297|XP_003085345
Tspan3	tetraspanin 3	-1.5334	0.00112185	56434_at	56434	ENSMUSG00000032324	NM_019793|NP_062767
Tardbp	TAR DNA binding protein	-1.51868	0.0450803	230908_at	230908	ENSMUSG00000041459	NM_001003898|NM_001003899|NM_001008545|NM_001008546|NM_145556|NP_001003898|NP_001003899|NP_001008545|NP_001008546|NP_663531|NR_027864
Smarcd3	SWI/SNF related, matrix associated, actin dependent regulator of chromatin, subfamily d, member 3	-1.51694	0.00938401	66993_at	66993	ENSMUSG00000028949	NM_025891|NP_080167
Dact1	dapper homolog 1, antagonist of beta-catenin (xenopus)	-1.5164	0.00283129	59036_at	59036	ENSMUSG00000044548	NM_001190466|NM_021532|NP_001177395|NP_067507
Wsb1	WD repeat and SOCS box-containing 1	-1.51197	0.0398987	78889_at	78889	ENSMUSG00000017677	NM_001042565|NM_019653|NP_001036030|NP_062627
Olfr859	olfactory receptor 859	-1.50308	0.00318705	258519_at	258519	ENSMUSG00000066903	NM_146526|NP_666737
Fstl1	follistatin-like 1	-1.50307	0.0113932	14314_at	14314	ENSMUSG00000022816	NM_008047|NP_032073
Rnf6	ring finger protein (C3H2C3 type) 6	-1.50254	0.0315556	74132_at	74132	ENSMUSG00000029634	NM_028774|NP_083050
Dnm1l	dynamin 1-like	-1.49968	0.0112469	74006_at	74006	ENSMUSG00000022789	NM_001025947|NM_152816|NP_001021118|NP_690029
Tecrl	trans-2,3-enoyl-CoA reductase-like	-1.49411	0.0100438	243078_at	243078	ENSMUSG00000049537	NM_153801|NP_722496
Mdk	midkine	-1.48918	0.0134597	17242_at	17242	ENSMUSG00000027239	NM_001012335|NM_001012336|NM_010784|NP_001012335|NP_001012336|NP_034914
Col3a1	collagen, type III, alpha 1	-1.48416	0.0259751	12825_at	12825	ENSMUSG00000026043	NM_009930|NP_034060
Srek1ip1	splicing regulatory glutamine/lysine-rich protein 1interacting protein 1	-1.48307	0.00107649	67288_at	67288	ENSMUSG00000021716	NM_026075|NP_080351
Lamb1	laminin B1	-1.48208	0.00162595	16777_at	16777	ENSMUSG00000002900	NM_008482|NP_032508
Lmo7	LIM domain only 7	-1.48198	0.0362049	380928_at	380928	ENSMUSG00000033060	NM_201529|NP_963287
Fam160b2	family with sequence similarity 160, member B2	-1.48112	0.00317837	239170_at	239170	ENSMUSG00000022095	NM_194345|NP_919326
Zfp799	zinc finger protein 799	-1.47894	0.0141108	240064_at	240064	ENSMUSG00000059000	NM_177359|NP_796333
Rbms3	RNA binding motif, single stranded interacting protein	-1.47007	0.0122636	207181_at	207181	ENSMUSG00000039607	NM_001172121|NM_001172122|NM_001172123|NM_001172124|NM_001172126|NM_178660|NP_001165592|NP_001165593|NP_001165594|NP_001165595|NP_001165597|NP_848775
Nrk	Nik related kinase	-1.4699	0.0103104	27206_at	27206	ENSMUSG00000052854	NM_013724|NP_038752
Ebag9	estrogen receptor-binding fragment-associated gene 9	-1.46838	0.0254258	55960_at	55960	ENSMUSG00000022339	NM_019480|NP_062353
Igsf10	immunoglobulin superfamily, member 10	-1.46822	0.0234071	242050_at	242050	ENSMUSG00000036334	NM_001162884|NP_001156356
Col6a3	collagen, type VI, alpha 3	-1.46781	0.0293026	12835_at	12835	ENSMUSG00000048126	XM_003085326|XM_003086176|XM_003086177|XM_003086178|XM_003086179|XM_003086180|XP_003085374|XP_003086224|XP_003086225|XP_003086226|XP_003086227|XP_003086228
Gprasp1	G protein-coupled receptor associated sorting protein 1	-1.46153	0.006793	67298_at	67298	ENSMUSG00000043384	NM_001004359|NM_001005385|NM_026081|NP_001004359|NP_001005385|NP_080357
Nr2f1	nuclear receptor subfamily 2, group F, member 1	-1.4609	0.0435926	13865_at	13865	ENSMUSG00000069171	NM_010151|NP_034281
Dsel	dermatan sulfate epimerase-like	-1.45984	0.00254822	319901_at	319901	ENSMUSG00000038702	NM_001081316|NP_001074785
Tmod3	tropomodulin 3	-1.45779	0.0073707	50875_at	50875	ENSMUSG00000058587	NM_016963|NP_058659
Col6a2	collagen, type VI, alpha 2	-1.45741	0.0485158	12834_at	12834	ENSMUSG00000020241	NM_146007|NP_666119
Srd5a2	steroid 5 alpha-reductase 2	-1.4568	0.00329271	94224_at	94224	ENSMUSG00000038541	NM_053188|NP_444418
Armcx1	armadillo repeat containing, X-linked 1	-1.45189	0.0256963	78248_at	78248	ENSMUSG00000033460	NM_001166377|NM_001166378|NM_001166379|NM_001166380|NM_030066|NP_001159849|NP_001159850|NP_001159851|NP_001159852|NP_084342
Fhod1	formin homology 2 domain containing 1	-1.44997	0.0024291	234686_at	234686	ENSMUSG00000014778	NM_177699|NP_808367
Ltbp3	latent transforming growth factor beta binding protein 3	-1.44698	0.00729541	16998_at	16998	ENSMUSG00000024940	NM_008520|NP_032546
Wls	wntless homolog (Drosophila)	-1.44673	0.018535	68151_at	68151	ENSMUSG00000028173	NM_026582|NP_080858|NR_037590
Sfrp2	secreted frizzled-related protein 2	-1.4443	0.00638818	20319_at	20319	ENSMUSG00000027996	NM_009144|NP_033170
Gcap14	granule cell antiserum positive 14	-1.44389	0.0174252	72972_at	72972	ENSMUSG00000058690	NM_027045|NM_028407|NP_081321|NP_082683
1190002N15Rik	RIKEN cDNA 1190002N15 gene	-1.44178	0.0232552	68861_at	68861	ENSMUSG00000045414	NM_001033145|NP_001028317
Mageh1	melanoma antigen, family H, 1	-1.4377	0.00399614	75625_at	75625	ENSMUSG00000047238	NM_023788|NP_076277
Tbx5	T-box 5	-1.43755	0.00589846	21388_at	21388	ENSMUSG00000018263	NM_011537|NP_035667
Bmp4	bone morphogenetic protein 4	-1.43714	0.00499362	12159_at	12159	ENSMUSG00000021835	NM_007554|NP_031580
Pxdn	peroxidasin homolog (Drosophila)	-1.4371	0.0133451	69675_at	69675	ENSMUSG00000020674	NM_181395|NP_852060
Raver2	ribonucleoprotein, PTB-binding 2	-1.43652	0.00221177	242570_at	242570	ENSMUSG00000035275	NM_183024|NP_898845
4832428D23Rik	RIKEN cDNA 4832428D23 gene	-1.43477	0.010158	403183_at	403183	ENSMUSG00000046828	NM_207281|NP_997164
Btbd10	BTB (POZ) domain containing 10	-1.43466	0.0243544	68815_at	68815	ENSMUSG00000038187	NM_133700|NP_598461
Dpysl2	dihydropyrimidinase-like 2	-1.43151	0.0110722	12934_at	12934	ENSMUSG00000022048	NM_009955|NP_034085
Bhlhb9	basic helix-loop-helix domain containing, class B9	-1.42494	0.0184709	70237_at	70237	ENSMUSG00000072964	NM_001098222|NM_198161|NP_001091692|NP_937804
Myf6	myogenic factor 6	-1.42267	0.000528288	17878_at	17878	ENSMUSG00000035923	NM_008657|NP_032683
Pdgfra	platelet derived growth factor receptor, alpha polypeptide	-1.42214	0.00283995	18595_at	18595	ENSMUSG00000029231	NM_001083316|NM_011058|NP_001076785|NP_035188
Fnbp1l	formin binding protein 1-like	-1.4126	0.0313648	214459_at	214459	ENSMUSG00000039735	NM_001114665|NM_153118|NP_001108137|NP_694758
Gtf2e1	general transcription factor II E, polypeptide 1 (alpha subunit)	-1.41152	0.00556255	74197_at	74197	ENSMUSG00000022828	NM_028812|NP_083088
Fam149b	family with sequence similarity 149, member B	-1.41124	0.00257942	105428_at	105428	ENSMUSG00000039599	NM_001024512|NM_001177633|NM_172379|NP_001019683|NP_001171104|NP_759011
Fmod	fibromodulin	-1.4106	0.0020504	14264_at	14264	ENSMUSG00000041559	NM_021355|NP_067330
Akap2	A kinase (PRKA) anchor protein 2	-1.41015	0.0109078	11641_at	11641	ENSMUSG00000038729	NM_001035532|NM_001035533|NM_009649|NP_001030609|NP_001030610|NP_033779
Fyco1	FYVE and coiled-coil domain containing 1	-1.4093	0.000985517	17281_at	17281	ENSMUSG00000025241	NM_001110253|NM_148925|NP_001103723|NP_683727
Fbn1	fibrillin 1	-1.4078	0.0222625	14118_at	14118	ENSMUSG00000027204	NM_007993|NP_032019
Anxa3	annexin A3	-1.40552	0.00014719	11745_at	11745	ENSMUSG00000029484	NM_013470|NP_038498
Tceal1	transcription elongation factor A (SII)-like 1	-1.40536	0.0350913	237052_at	237052	ENSMUSG00000049536	NM_146236|NP_666348
Egflam	EGF-like, fibronectin type III and laminin G domains	-1.40083	0.0336314	268780_at	268780	ENSMUSG00000042961	NM_178748|NP_848863
Cacna2d1	calcium channel, voltage-dependent, alpha2/delta subunit 1	-1.3993	0.00403696	12293_at	12293	ENSMUSG00000040118	NM_001110843|NM_001110844|NM_001110845|NM_001110846|NM_009784|NP_001104313|NP_001104314|NP_001104315|NP_001104316|NP_033914
Ccng1	cyclin G1	-1.3963	0.0423737	12450_at	12450	ENSMUSG00000020326	NM_009831|NP_033961
Slc39a10	solute carrier family 39 (zinc transporter), member 10	-1.39607	0.00745068	227059_at	227059	ENSMUSG00000025986	NM_172653|NP_766241
Ccl11	chemokine (C-C motif) ligand 11	-1.39452	0.0159294	20292_at	20292	ENSMUSG00000020676	NM_011330|NP_035460
Dcbld2	discoidin, CUB and LCCL domain containing 2	-1.39438	0.0114223	73379_at	73379	ENSMUSG00000035107	NM_028523|NP_082799
Tm9sf3	transmembrane 9 superfamily member 3	-1.39438	0.0203347	107358_at	107358	ENSMUSG00000025016	NM_133352|NP_579930
Map4k3	mitogen-activated protein kinase kinase kinase kinase 3	-1.39389	0.00839311	225028_at	225028	ENSMUSG00000024242	NM_001081357|NP_001074826
Akap5	A kinase (PRKA) anchor protein 5	-1.39191	0.0239787	238276_at	238276	ENSMUSG00000021057	NM_001101471|NP_001094941
4930550L24Rik	RIKEN cDNA 4930550L24 gene	-1.39188	0.00106616	75352_at	75352	ENSMUSG00000046180	NM_023774|NP_076263
Vezf1	vascular endothelial zinc finger 1	-1.39147	0.0322088	22344_at	22344	ENSMUSG00000018377	NM_016686|NP_057895
Gpbp1	GC-rich promoter binding protein 1	-1.3891	0.0290014	73274_at	73274	ENSMUSG00000032745	NM_001122963|NM_028487|NP_001116435|NP_082763
Vim	vimentin	-1.38758	0.0114527	22352_at	22352	ENSMUSG00000026728	NM_011701|NP_035831
B230219D22Rik	RIKEN cDNA B230219D22 gene	-1.3866	0.0130004	78521_at	78521	ENSMUSG00000045767	NM_181278|NP_851795
Crybg3	beta-gamma crystallin domain containing 3	-1.38529	0.0135288	224273_at	224273	ENSMUSG00000022723	NM_174848|NP_777273
LOC100503638	hypothetical LOC100503638	-1.38528	0.00643148	100503638_at	100503638	NA	XR_104893
Ttc4	tetratricopeptide repeat domain 4	-1.3845	0.00852534	72354_at	72354	ENSMUSG00000025413	NM_001172073|NM_028209|NP_001165544|NP_082485
Sgcb	sarcoglycan, beta (dystrophin-associated glycoprotein)	-1.38362	0.00522076	24051_at	24051	ENSMUSG00000029156	NM_011890|NP_036020
Eef1a2	eukaryotic translation elongation factor 1 alpha 2	-1.38331	0.00758996	13628_at	13628	ENSMUSG00000016349	NM_007906|NP_031932
Bgn	biglycan	-1.38309	0.024432	12111_at	12111	ENSMUSG00000031375	NM_007542|NP_031568
Rraga	Ras-related GTP binding A	-1.37869	0.0292569	68441_at	68441	ENSMUSG00000070934	NM_178376|NP_848463
Clec3a	C-type lectin domain family 3, member a	-1.37683	3.93827e-05	403395_at	403395	ENSMUSG00000008874	NM_001007223|NP_001007224
Zfp260	zinc finger protein 260	-1.37542	0.0335639	26466_at	26466	ENSMUSG00000049421	NM_011981|NP_036111
2810432L12Rik	RIKEN cDNA 2810432L12 gene	-1.37421	0.00215411	67063_at	67063	ENSMUSG00000039611	NM_025944|NP_080220
Zfp68	zinc finger protein 68	-1.37075	0.0049938	24135_at	24135	ENSMUSG00000058291	NM_001044747|NM_001163797|NM_013844|NP_001038212|NP_001157269|NP_038872
Tmtc2	transmembrane and tetratricopeptide repeat containing 2	-1.37017	0.0393835	278279_at	278279	ENSMUSG00000036019	NM_177368|NP_796342
Zbtb33	zinc finger and BTB domain containing 33	-1.36965	0.0300295	56805_at	56805	ENSMUSG00000048047	NM_001079513|NM_020256|NP_001072981|NP_064652
3632451O06Rik	RIKEN cDNA 3632451O06 gene	-1.36905	0.00715695	67419_at	67419	ENSMUSG00000036242	NM_026142|NP_080418
Umod	uromodulin	-1.36801	0.0216119	22242_at	22242	ENSMUSG00000030963	NM_009470|NP_033496
Mia1	melanoma inhibitory activity 1	-1.36716	0.0240214	12587_at	12587	ENSMUSG00000089661	NM_019394|NP_062267
Cbx6	chromobox homolog 6	-1.3663	0.0214314	494448_at	494448	ENSMUSG00000089715	NM_028763|NP_083039
Sccpdh	saccharopine dehydrogenase (putative)	-1.36319	0.0328201	109232_at	109232	ENSMUSG00000038936	NM_178653|NP_848768
Aplnr	apelin receptor	-1.36245	0.0139515	23796_at	23796	ENSMUSG00000044338	NM_011784|NP_035914
Hunk	hormonally upregulated Neu-associated kinase	-1.36243	0.0219956	26559_at	26559	ENSMUSG00000053414	NM_015755|NP_056570
Adam19	a disintegrin and metallopeptidase domain 19 (meltrin beta)	-1.36117	0.00117081	11492_at	11492	ENSMUSG00000011256	NM_009616|NP_033746
Syncrip	synaptotagmin binding, cytoplasmic RNA interacting protein	-1.36113	0.0305489	56403_at	56403	ENSMUSG00000032423	NM_019666|NM_019796|NP_062640|NP_062770
Tmie	transmembrane inner ear	-1.36111	0.0451274	20776_at	20776	ENSMUSG00000049555	NM_146260|NP_666372
Rabep1	rabaptin, RAB GTPase binding effector protein 1	-1.36039	0.0459046	54189_at	54189	ENSMUSG00000020817	NM_019400|NP_062273
Mettl9	methyltransferase like 9	-1.35906	0.00227659	59052_at	59052	ENSMUSG00000030876	NM_021554|NP_067529
Med6	mediator of RNA polymerase II transcription, subunit 6 homolog (yeast)	-1.35858	0.00864045	69792_at	69792	ENSMUSG00000002679	NM_027213|NP_081489
Tmod2	tropomodulin 2	-1.35651	0.00222107	50876_at	50876	ENSMUSG00000032186	NM_001038710|NM_016711|NP_001033799|NP_057920
Tug1	taurine upregulated gene 1	-1.35642	0.0180622	544752_at	544752	ENSMUSG00000056579	NR_002321|NR_002322
Itm2a	integral membrane protein 2A	-1.35295	0.0168101	16431_at	16431	ENSMUSG00000031239	NM_008409|NP_032435
Tril	TLR4 interactor with leucine-rich repeats	-1.35178	0.00484796	66873_at	66873	ENSMUSG00000043496	NM_025817|NP_080093
Plce1	phospholipase C, epsilon 1	-1.35147	0.0176471	74055_at	74055	ENSMUSG00000024998	NM_019588|NP_062534
Limch1	LIM and calponin homology domains 1	-1.35094	0.0410336	77569_at	77569	ENSMUSG00000037736	NM_001001980|NP_001001980
Casp8	caspase 8	-1.35033	0.0322158	12370_at	12370	ENSMUSG00000026029	NM_001080126|NM_009812|NP_001073595|NP_033942
Maged2	melanoma antigen, family D, 2	-1.34754	0.0325887	80884_at	80884	ENSMUSG00000025268	NM_001199246|NM_030700|NP_001186175|NP_109625
Tfpi	tissue factor pathway inhibitor	-1.34743	0.0367545	21788_at	21788	ENSMUSG00000027082	NM_001177319|NM_001177320|NM_011576|NP_001170790|NP_001170791|NP_035706
Bambi	BMP and activin membrane-bound inhibitor, homolog (Xenopus laevis)	-1.34662	0.0116232	68010_at	68010	ENSMUSG00000024232	NM_026505|NP_080781
Synpo2	synaptopodin 2	-1.34608	0.0314054	118449_at	118449	ENSMUSG00000050315	NM_080451|NP_536699
4930578C19Rik	RIKEN cDNA 4930578C19 gene	-1.34427	0.036914	75905_at	75905	ENSMUSG00000037358	NM_175228|NP_780437
Col1a2	collagen, type I, alpha 2	-1.34163	0.0345484	12843_at	12843	ENSMUSG00000029661	NM_007743|NP_031769
Mycn	v-myc myelocytomatosis viral related oncogene, neuroblastoma derived (avian)	-1.34158	0.00488066	18109_at	18109	ENSMUSG00000037169	NM_008709|NP_032735
Btbd3	BTB (POZ) domain containing 3	-1.33983	0.0313081	228662_at	228662	ENSMUSG00000062098	NM_001025431|NM_145534|NP_001020602|NP_663509
Adamts9	a disintegrin-like and metallopeptidase (reprolysin type) with thrombospondin type 1 motif, 9	-1.33888	0.0232493	101401_at	101401	ENSMUSG00000030022	NM_175314|NP_780523
Selm	selenoprotein M	-1.33707	0.00292255	114679_at	114679	ENSMUSG00000075702	NM_053267|NP_444497
Trim72	tripartite motif-containing 72	-1.33701	0.0393639	434246_at	434246	ENSMUSG00000042828	NM_001079932|NP_001073401
Tbc1d8b	TBC1 domain family, member 8B	-1.33568	0.043893	245638_at	245638	ENSMUSG00000042473	NM_001081499|NP_001074968
Fbln1	fibulin 1	-1.33519	0.0472359	14114_at	14114	ENSMUSG00000006369	NM_010180|NP_034310
Scube2	signal peptide, CUB domain, EGF-like 2	-1.33514	0.0110751	56788_at	56788	ENSMUSG00000007279	NM_020052|NP_064436
Ednrb	endothelin receptor type B	-1.33484	0.0164976	13618_at	13618	ENSMUSG00000022122	NM_001136061|NM_007904|NP_001129533|NP_031930
Oxct2a	3-oxoacid CoA transferase 2A	-1.33368	0.024391	64059_at	64059	ENSMUSG00000076436	NM_022033|NP_071316
Wtip	WT1-interacting protein	-1.33354	0.0171821	101543_at	101543	ENSMUSG00000036459	NM_207212|NP_997095
Zzz3	zinc finger, ZZ domain containing 3	-1.33264	0.0324003	108946_at	108946	ENSMUSG00000039068	NM_001080755|NM_198416|NP_001074224|NP_940808
Mobkl2c	MOB1, Mps One Binder kinase activator-like 2C (yeast)	-1.33138	0.0102961	100465_at	100465	ENSMUSG00000028709	NM_175308|NP_780517
Tmem167	transmembrane protein 167	-1.33124	0.00586587	66074_at	66074	ENSMUSG00000012422	NM_025335|NP_079611
Sv2a	synaptic vesicle glycoprotein 2 a	-1.33047	0.0307084	64051_at	64051	ENSMUSG00000038486	NM_022030|NP_071313
Fancb	Fanconi anemia, complementation group B	-1.32865	0.00870598	237211_at	237211	ENSMUSG00000047757	NM_001146081|NM_175027|NP_001139553|NP_778192
Zc3h14	zinc finger CCCH type containing 14	-1.32839	0.0470445	75553_at	75553	ENSMUSG00000021012	NM_001008506|NM_001160107|NM_001160108|NM_029334|NP_001008506|NP_001153579|NP_001153580|NP_083610|NR_027648
Reck	reversion-inducing-cysteine-rich protein with kazal motifs	-1.32818	0.0459829	53614_at	53614	ENSMUSG00000028476	NM_016678|NP_057887
Trim34a	tripartite motif-containing 34A	-1.32599	0.021245	94094_at	94094	ENSMUSG00000056144	NM_030684|NP_109609
Epha4	Eph receptor A4	-1.3238	0.0374358	13838_at	13838	ENSMUSG00000026235	NM_007936|NP_031962
Nedd4	neural precursor cell expressed, developmentally down-regulated 4	-1.32224	0.00204411	17999_at	17999	ENSMUSG00000032216	NM_010890|NP_035020
Smurf2	SMAD specific E3 ubiquitin protein ligase 2	-1.32192	0.00635969	66313_at	66313	ENSMUSG00000018363	NM_025481|NP_079757
B3galnt1	UDP-GalNAc:betaGlcNAc beta 1,3-galactosaminyltransferase, polypeptide 1	-1.32163	0.0150268	26879_at	26879	ENSMUSG00000043300	NM_020026|NP_064410
Sema3e	sema domain, immunoglobulin domain (Ig), short basic domain, secreted, (semaphorin) 3E	-1.32094	0.0411701	20349_at	20349	ENSMUSG00000063531	NM_011348|NP_035478
Lpar1	lysophosphatidic acid receptor 1	-1.32076	0.0259042	14745_at	14745	ENSMUSG00000038668	NM_010336|NM_172989|NP_034466|NP_766577
Mtpn	myotrophin	-1.32055	0.0341511	14489_at	14489	ENSMUSG00000029840	NM_008098|NP_032124
Lrrc45	leucine rich repeat containing 45	-1.31948	0.00898653	217366_at	217366	ENSMUSG00000025145	NM_153545|NP_705773
Fundc1	FUN14 domain containing 1	-1.31948	0.0155837	72018_at	72018	ENSMUSG00000025040	NM_028058|NP_082334
Man1a2	mannosidase, alpha, class 1A, member 2	-1.31828	0.0230262	17156_at	17156	ENSMUSG00000008763	NM_010763|NP_034893
Phf14	PHD finger protein 14	-1.31823	0.0415791	75725_at	75725	ENSMUSG00000029629	NM_001168382|NM_029404|NP_001161854|NP_083680
Ankar	ankyrin and armadillo repeat containing	-1.31728	0.0106269	319695_at	319695	ENSMUSG00000039342	NM_176980|NP_795954
Fign	fidgetin	-1.31682	0.0426859	60344_at	60344	ENSMUSG00000075324	NM_021716|NP_068362|XR_104779|XR_107419
Tpm4	tropomyosin 4	-1.31538	0.00204357	326618_at	326618	ENSMUSG00000031799	NM_001001491|NP_001001491
1110021L09Rik	RIKEN cDNA 1110021L09 gene	-1.31436	0.0307979	76306_at	76306	ENSMUSG00000037455	NM_183116|NP_898939
Arhgap33	Rho GTPase activating protein 33	-1.31352	0.00714727	233071_at	233071	ENSMUSG00000036882	NM_178252|NP_839983
B230120H23Rik	RIKEN cDNA B230120H23 gene	-1.31325	0.0450518	65964_at	65964	ENSMUSG00000004085	NM_001164791|NM_023057|NM_178084|NP_001158263|NP_075544|NP_835185
Ccnj	cyclin J	-1.31314	0.0264219	240665_at	240665	ENSMUSG00000025010	NM_172839|NP_766427
4833427G06Rik	RIKEN cDNA 4833427G06 gene	-1.31185	0.0154372	235345_at	235345	ENSMUSG00000032057	NM_177702|NP_808370
AW549877	expressed sequence AW549877	-1.31129	0.0289313	106064_at	106064	ENSMUSG00000041935	NM_145930|NP_666042
Kcnj5	potassium inwardly-rectifying channel, subfamily J, member 5	-1.31	0.00141152	16521_at	16521	ENSMUSG00000032034	NM_010605|NP_034735
Dach1	dachshund 1 (Drosophila)	-1.30938	0.0184719	13134_at	13134	ENSMUSG00000055639	NM_001038610|NM_007826|NP_001033699|NP_031852
Ng23	Ng23 protein	-1.30844	0.0223093	78376_at	78376	ENSMUSG00000036185	NM_023893|NP_076382|NR_028258
Oxct1	3-oxoacid CoA transferase 1	-1.30754	0.00435745	67041_at	67041	ENSMUSG00000022186	NM_024188|NP_077150
Vezt	vezatin, adherens junctions transmembrane protein	-1.30747	0.0155375	215008_at	215008	ENSMUSG00000036099	NM_172538|NP_766126
Zfp664	zinc finger protein 664	-1.3071	0.0375864	269704_at	269704	ENSMUSG00000079215	NM_001081750|NP_001075219
Hrc	histidine rich calcium binding protein	-1.30675	0.0318483	15464_at	15464	ENSMUSG00000038239	NM_010473|NP_034603
5830415F09Rik	RIKEN cDNA 5830415F09 gene	-1.30671	0.00614211	74753_at	74753	ENSMUSG00000028331	NM_029086|NP_083362
Nucb2	nucleobindin 2	-1.30213	0.0438277	53322_at	53322	ENSMUSG00000030659	NM_001130479|NM_016773|NP_001123951|NP_058053
Rcn1	reticulocalbin 1	-1.29991	0.00997228	19672_at	19672	ENSMUSG00000005973	NM_009037|NP_033063
Hdac8	histone deacetylase 8	-1.29921	0.0157872	70315_at	70315	ENSMUSG00000067567	NM_027382|NP_081658
Fgfrl1	fibroblast growth factor receptor-like 1	-1.29857	0.0176624	116701_at	116701	ENSMUSG00000008090	NM_001164259|NM_054071|NP_001157731|NP_473412
Rai14	retinoic acid induced 14	-1.29852	0.00571398	75646_at	75646	ENSMUSG00000022246	NM_001166408|NM_030690|NP_001159880|NP_109615
Rfc3	replication factor C (activator 1) 3	-1.29818	0.0340699	69263_at	69263	ENSMUSG00000033970	NM_027009|NP_081285
Arhgap18	Rho GTPase activating protein 18	-1.29751	0.00776432	73910_at	73910	ENSMUSG00000039031	NM_176837|NP_789807
Matn4	matrilin 4	-1.2975	0.0488451	17183_at	17183	ENSMUSG00000016995	NM_013592|NP_038620
Zfp119b	zinc finger protein 119b	-1.29501	0.0468906	240120_at	240120	ENSMUSG00000062101	NM_146249|NP_666361
Enpp4	ectonucleotide pyrophosphatase/phosphodiesterase 4	-1.29467	0.0397356	224794_at	224794	ENSMUSG00000023961	NM_199016|NP_950181
Nol3	nucleolar protein 3 (apoptosis repressor with CARD domain)	-1.29327	0.00145473	78688_at	78688	ENSMUSG00000014776	NM_030152|NP_084428
Scn3b	sodium channel, voltage-gated, type III, beta	-1.29263	0.0398485	235281_at	235281	ENSMUSG00000049281	NM_001083917|NM_153522|NM_178227|NP_001077386|NP_705742|NP_839941
Klhl13	kelch-like 13 (Drosophila)	-1.29184	0.0292883	67455_at	67455	ENSMUSG00000036782	NM_026167|NP_080443
Dppa4	developmental pluripotency associated 4	-1.29135	0.0445447	73693_at	73693	ENSMUSG00000058550	NM_001018002|NM_028610|NP_001018002|NP_082886
Mest	mesoderm specific transcript	-1.29128	0.00489903	17294_at	17294	ENSMUSG00000051855	NM_008590|NP_032616
Galntl4	UDP-N-acetyl-alpha-D-galactosamine:polypeptide N-acetylgalactosaminyltransferase-like 4	-1.29124	0.0171582	233733_at	233733	ENSMUSG00000038296	NM_173739|NP_776100
Flrt3	fibronectin leucine rich transmembrane protein 3	-1.29056	0.0418276	71436_at	71436	ENSMUSG00000051379	NM_001172160|NM_178382|NP_001165631|NP_848469
Usp13	ubiquitin specific peptidase 13 (isopeptidase T-3)	-1.28955	0.0478826	72607_at	72607	ENSMUSG00000056900	NM_001013024|NP_001013042
Tns3	tensin 3	-1.28918	0.00436854	319939_at	319939	ENSMUSG00000020422	NM_001083587|NP_001077056
2510009E07Rik	RIKEN cDNA 2510009E07 gene	-1.28767	0.047555	72190_at	72190	ENSMUSG00000043391	NM_001001881|NP_001001881
Smad5	MAD homolog 5 (Drosophila)	-1.28686	0.027026	17129_at	17129	ENSMUSG00000021540	NM_001164041|NM_001164042|NM_008541|NP_001157513|NP_001157514|NP_032567
Pbx1	pre B-cell leukemia transcription factor 1	-1.28631	0.0033898	18514_at	18514	ENSMUSG00000052534	NM_008783|NM_183355|NP_032809|NP_899198
Macf1	microtubule-actin crosslinking factor 1	-1.28587	0.0499798	11426_at	11426	ENSMUSG00000028649	NM_001199136|NM_001199137|NM_009600|NP_001186065|NP_001186066|NP_033730
Cfl2	cofilin 2, muscle	-1.28474	0.0116715	12632_at	12632	ENSMUSG00000062929	NM_007688|NP_031714
Mbip	MAP3K12 binding inhibitory protein 1	-1.2844	0.046052	217588_at	217588	ENSMUSG00000021028	NM_145442|NP_663417
Med19	mediator of RNA polymerase II transcription, subunit 19 homolog (yeast)	-1.28423	0.0349144	381379_at	381379	ENSMUSG00000027080	NM_025885|NP_080161
Slc41a1	solute carrier family 41, member 1	-1.28345	0.025869	98396_at	98396	ENSMUSG00000013275	NM_173865|NP_776290
Samd4	sterile alpha motif domain containing 4	-1.28304	0.0109718	74480_at	74480	ENSMUSG00000021838	NM_001037221|NM_001163433|NM_028966|NP_001032298|NP_001156905|NP_083242
Pkia	protein kinase inhibitor, alpha	-1.2829	0.00598524	18767_at	18767	ENSMUSG00000027499	NM_008862|NP_032888
Cmpk1	cytidine monophosphate (UMP-CMP) kinase 1	-1.28277	0.0176026	66588_at	66588	ENSMUSG00000028719	NM_025647|NP_079923
Aadat	aminoadipate aminotransferase	-1.28245	0.0332082	23923_at	23923	ENSMUSG00000057228	NM_011834|NP_035964
Col15a1	collagen, type XV, alpha 1	-1.28243	0.0128281	12819_at	12819	ENSMUSG00000028339	NM_009928|NP_034058
Sulf1	sulfatase 1	-1.28217	0.0366602	240725_at	240725	ENSMUSG00000016918	NM_001198565|NM_001198566|NM_172294|NP_001185494|NP_001185495|NP_758498
Sh3d19	SH3 domain protein D19	-1.28183	0.0213354	27059_at	27059	ENSMUSG00000028082	NM_001082414|NP_001075883
Tsc22d3	TSC22 domain family, member 3	-1.28119	0.0226679	14605_at	14605	ENSMUSG00000031431	NM_001077364|NM_010286|NP_001070832|NP_034416
Abcc9	ATP-binding cassette, sub-family C (CFTR/MRP), member 9	-1.28114	0.00217843	20928_at	20928	ENSMUSG00000030249	NM_001044720|NM_011511|NM_021041|NM_021042|NP_001038185|NP_035641|NP_066378|NP_066379
Faim	Fas apoptotic inhibitory molecule	-1.28095	0.0472032	23873_at	23873	ENSMUSG00000032463	NM_001122851|NM_011810|NP_001116323|NP_035940
Olfr787	olfactory receptor 787	-1.28026	0.00152059	258069_at	258069	ENSMUSG00000057617	NM_001011822|NP_001011822
Eif5	eukaryotic translation initiation factor 5	-1.27986	0.0314887	217869_at	217869	ENSMUSG00000021282	NM_173363|NM_178041|NP_775539|NP_829887
Susd2	sushi domain containing 2	-1.27964	0.0369376	71733_at	71733	ENSMUSG00000006342	NM_001162913|NM_027890|NP_001156385|NP_082166
Rasa2	RAS p21 protein activator 2	-1.27957	0.0488612	114713_at	114713	ENSMUSG00000032413	NM_053268|NP_444498
Tpbpb	trophoblast specific protein beta	-1.27927	0.00862908	116913_at	116913	ENSMUSG00000062705	NM_026429|NP_080705
Snapin	SNAP-associated protein	-1.27796	0.0142633	20615_at	20615	ENSMUSG00000001018	NM_133854|NP_598615
Snord123	small nucleolar RNA, C/D box 123	-1.27723	0.0353801	66835_at	66835	ENSMUSG00000089317	NR_028575
1500031L02Rik	RIKEN cDNA 1500031L02 gene	-1.27711	0.021306	66994_at	66994	ENSMUSG00000035790	NM_025892|NP_080168
Cadm3	cell adhesion molecule 3	-1.27698	0.0427131	94332_at	94332	ENSMUSG00000005338	NM_053199|NP_444429
9330151L19Rik	RIKEN cDNA 9330151L19 gene	-1.27663	0.00992007	414085_at	414085	NA	NR_033222
Rps27	ribosomal protein S27	-1.27605	0.00324197	57294_at	57294	ENSMUSG00000090733	NM_027015|NP_081291|NR_033727
Gpr125	G protein-coupled receptor 125	-1.27308	0.0358123	70693_at	70693	ENSMUSG00000029090	NM_133911|NP_598672
Alb	albumin	-1.27281	0.0468128	11657_at	11657	ENSMUSG00000029368	NM_009654|NP_033784
Bmx	BMX non-receptor tyrosine kinase	-1.27262	0.0248883	12169_at	12169	ENSMUSG00000031377	NM_009759|NP_033889
Kank4	KN motif and ankyrin repeat domains 4	-1.26977	0.0182794	242553_at	242553	ENSMUSG00000035407	NM_172872|NP_766460
Ccnd1	cyclin D1	-1.2681	0.0155649	12443_at	12443	ENSMUSG00000070348	NM_007631|NP_031657
Rgs8	regulator of G-protein signaling 8	-1.26771	0.0040105	67792_at	67792	ENSMUSG00000042671	NM_026380|NP_080656
C030034I22Rik	RIKEN cDNA C030034I22 gene	-1.26705	0.0240888	77533_at	77533	NA	NR_026848
Plekhg1	pleckstrin homology domain containing, family G (with RhoGef domain) member 1	-1.26665	0.0246656	213783_at	213783	ENSMUSG00000040624	NM_001033253|NM_001159942|NP_001028425|NP_001153414
Impa1	inositol (myo)-1(or 4)-monophosphatase 1	-1.2663	0.025967	55980_at	55980	ENSMUSG00000027531	NM_018864|NP_061352
Jub	ajuba	-1.26566	0.00951094	16475_at	16475	ENSMUSG00000022178	NM_010590|NP_034720
Nid2	nidogen 2	-1.26552	0.0277854	18074_at	18074	ENSMUSG00000021806	NM_008695|NP_032721
D630045M09Rik	RIKEN cDNA D630045M09 gene	-1.2648	0.0127581	432777_at	432777	NA	XR_105559|XR_106806
Prox1	prospero-related homeobox 1	-1.26445	0.00838198	19130_at	19130	ENSMUSG00000010175	NM_008937|NP_032963
SEPT7	septin 7	-1.26421	0.0159015	235072_at	235072	ENSMUSG00000001833	NM_009859|NP_033989
Coq7	demethyl-Q 7	-1.26383	0.0170514	12850_at	12850	ENSMUSG00000030652	NM_009940|NP_034070
Leprel4	leprecan-like 4	-1.26315	0.00970613	66180_at	66180	ENSMUSG00000006931	NM_176830|NP_789800
BC067068	cDNA sequence BC067068	-1.26307	0.0190881	216292_at	216292	ENSMUSG00000036009	NM_207522|NP_997405
Olfr945	olfactory receptor 945	-1.26294	0.0129893	258499_at	258499	ENSMUSG00000063380	NM_146506|NP_666717
Ap3m1	adaptor-related protein complex 3, mu 1 subunit	-1.26273	0.0161531	55946_at	55946	ENSMUSG00000021824	NM_018829|NP_061299
Rhbdf1	rhomboid family 1 (Drosophila)	-1.26253	0.0121332	13650_at	13650	ENSMUSG00000020282	NM_010117|NP_034247
Tpd52l1	tumor protein D52-like 1	-1.26249	0.00497842	21987_at	21987	ENSMUSG00000000296	NM_009413|NP_033439
Pcdh17	protocadherin 17	-1.2624	0.0443131	219228_at	219228	ENSMUSG00000035566	NM_001013753|NP_001013775
Sox30	SRY-box containing gene 30	-1.25885	0.0137421	214105_at	214105	ENSMUSG00000040489	NM_173384|NP_775560
Cramp1l	Crm, cramped-like (Drosophila)	-1.2588	0.010699	57354_at	57354	ENSMUSG00000038002	NM_020608|NP_065633
Xist	inactive X specific transcripts	-1.25878	0.00966281	213742_at	213742	ENSMUSG00000086503	NR_001463|NR_001570
Pcnt	pericentrin (kendrin)	-1.25826	0.015469	18541_at	18541	ENSMUSG00000001151	NM_008787|NP_032813
Rnf122	ring finger protein 122	-1.25712	0.0242796	68867_at	68867	ENSMUSG00000039328	NM_175136|NP_780345
Hdgfrp3	hepatoma-derived growth factor, related protein 3	-1.25622	0.005389	29877_at	29877	ENSMUSG00000025104	NM_013886|NP_038914
Vgll2	vestigial like 2 homolog (Drosophila)	-1.25613	0.0147093	215031_at	215031	ENSMUSG00000049641	NM_153786|NP_722481
Gpbar1	G protein-coupled bile acid receptor 1	-1.25528	0.00771262	227289_at	227289	ENSMUSG00000064272	NM_174985|NP_778150
Atrnl1	attractin like 1	-1.2551	0.012989	226255_at	226255	ENSMUSG00000054843	NM_181415|NP_852080
Vps26a	vacuolar protein sorting 26 homolog A (yeast)	-1.25502	0.00398402	30930_at	30930	ENSMUSG00000020078	NM_001113355|NM_133672|NP_001106826|NP_598433
Ptprn2	protein tyrosine phosphatase, receptor type, N polypeptide 2	-1.25499	0.0178439	19276_at	19276	ENSMUSG00000056553	NM_011215|NP_035345
Epb4.1l2	erythrocyte protein band 4.1-like 2	-1.25471	0.04684	13822_at	13822	ENSMUSG00000019978	NM_001199265|NM_013511|NP_001186194|NP_038539
Lum	lumican	-1.25462	0.029216	17022_at	17022	ENSMUSG00000036446	NM_008524|NP_032550
1600010M07Rik	RIKEN cDNA 1600010M07 gene	-1.25444	0.043567	69781_at	69781	NA	NR_037959|XR_105149|XR_107935
Ddx46	DEAD (Asp-Glu-Ala-Asp) box polypeptide 46	-1.25368	0.0200888	212880_at	212880	ENSMUSG00000021500	NM_145975|NP_666087
1700106J16Rik	RIKEN cDNA 1700106J16 gene	-1.25281	0.0101342	74297_at	74297	ENSMUSG00000034031	NM_028859|NP_083135
Gnai3	guanine nucleotide binding protein (G protein), alpha inhibiting 3	-1.25233	0.0402454	14679_at	14679	ENSMUSG00000000001	NM_010306|NP_034436
Satb1	special AT-rich sequence binding protein 1	-1.2519	0.0262849	20230_at	20230	ENSMUSG00000023927	NM_001163630|NM_001163631|NM_001163632|NM_009122|NP_001157102|NP_001157103|NP_001157104|NP_033148
Zfp532	zinc finger protein 532	-1.25128	0.0161438	328977_at	328977	ENSMUSG00000042439	NM_207255|NP_997138
Nrip3	nuclear receptor interacting protein 3	-1.25066	0.0222661	78593_at	78593	ENSMUSG00000034825	NM_020610|NP_065635
Vamp3	vesicle-associated membrane protein 3	-1.24792	0.00449369	22319_at	22319	ENSMUSG00000028955	NM_009498|NP_033524
Rfxap	regulatory factor X-associated protein	-1.24791	0.0264431	170767_at	170767	ENSMUSG00000036615	NM_133231|NP_573494
1700012B09Rik	RIKEN cDNA 1700012B09 gene	-1.24701	0.0109946	69325_at	69325	ENSMUSG00000031927	NM_029306|NP_083582
Tmem132a	transmembrane protein 132A	-1.2468	0.0224443	98170_at	98170	ENSMUSG00000024736	NM_133804|NP_598565
Ropn1	ropporin, rhophilin associated protein 1	-1.24624	0.00762649	76378_at	76378	ENSMUSG00000022832	NM_030744|NP_109669
Cyld	cylindromatosis (turban tumor syndrome)	-1.24604	0.0302752	74256_at	74256	ENSMUSG00000036712	NM_001128169|NM_001128170|NM_001128171|NM_173369|NP_001121641|NP_001121642|NP_001121643|NP_775545
Rala	v-ral simian leukemia viral oncogene homolog A (ras related)	-1.24582	0.0253452	56044_at	56044	ENSMUSG00000008859	NM_019491|NP_062364
Trpm5	transient receptor potential cation channel, subfamily M, member 5	-1.24554	0.0102714	56843_at	56843	ENSMUSG00000009246	NM_020277|NP_064673
C330007P06Rik	RIKEN cDNA C330007P06 gene	-1.24506	0.0470337	77644_at	77644	ENSMUSG00000006423	NM_029951|NP_084227
Ckap2	cytoskeleton associated protein 2	-1.24452	0.0445803	80986_at	80986	ENSMUSG00000037725	NM_001004140|NP_001004140
Zfp810	zinc finger protein 810	-1.2438	0.0479611	235050_at	235050	ENSMUSG00000066829	NM_145612|NP_663587
Zfp385c	zinc finger protein 385C	-1.24376	0.0106879	278304_at	278304	ENSMUSG00000014198	NM_177790|NP_808458
Dync1li2	dynein, cytoplasmic 1 light intermediate chain 2	-1.24367	0.00385297	234663_at	234663	ENSMUSG00000035770	NM_001013380|NP_001013398
Sorcs2	sortilin-related VPS10 domain containing receptor 2	-1.24367	0.0230523	81840_at	81840	ENSMUSG00000029093	NM_030889|NP_112151
Prkd3	protein kinase D3	-1.24196	0.0358527	75292_at	75292	ENSMUSG00000024070	NM_001171004|NM_001171005|NM_029239|NP_001164475|NP_001164476|NP_083515
Prss50	protease, serine, 50	-1.24156	0.00958052	235631_at	235631	ENSMUSG00000048752	NM_146227|NP_666339
Cpne3	copine III	-1.24083	0.0417893	70568_at	70568	ENSMUSG00000028228	NM_027769|NP_082045
Rad54l2	RAD54 like 2 (S. cerevisiae)	-1.23933	0.00274887	81000_at	81000	ENSMUSG00000040661	NM_030730|NP_109655
Olfr1263	olfactory receptor 1263	-1.23915	0.00321025	258790_at	258790	ENSMUSG00000059112	NM_146794|NP_667005
Prg4	proteoglycan 4 (megakaryocyte stimulating factor, articular superficial zone protein)	-1.23844	0.00920148	96875_at	96875	ENSMUSG00000006014	NM_001110146|NM_021400|NP_001103616|NP_067375
Iws1	IWS1 homolog (S. cerevisiae)	-1.23832	0.0379942	73473_at	73473	ENSMUSG00000024384	NM_173441|NP_775617
Parp6	poly (ADP-ribose) polymerase family, member 6	-1.23824	0.0350842	67287_at	67287	ENSMUSG00000025237	NM_029922|NP_084198
Hnrnpa0	heterogeneous nuclear ribonucleoprotein A0	-1.23739	0.00397218	77134_at	77134	ENSMUSG00000007836	NM_029872|NP_084148
Trak1	trafficking protein, kinesin binding 1	-1.23642	0.0296939	67095_at	67095	ENSMUSG00000032536	NM_175114|NP_780323
Casd1	CAS1 domain containing 1	-1.2362	0.0409277	213819_at	213819	ENSMUSG00000015189	NM_145398|NP_663373
Poglut1	protein O-glucosyltransferase 1	-1.23588	0.0136914	224143_at	224143	ENSMUSG00000034064	NM_172380|NP_759012
Zfp763	zinc finger protein 763	-1.23403	0.0388186	73451_at	73451	ENSMUSG00000067430	NM_028543|NP_082819
2500003M10Rik	RIKEN cDNA 2500003M10 gene	-1.23344	0.0339185	66511_at	66511	ENSMUSG00000001017	NM_023215|NP_075704
Basp1	brain abundant, membrane attached signal protein 1	-1.23278	0.0316974	70350_at	70350	ENSMUSG00000045763	NM_027395|NP_081671
2900026A02Rik	RIKEN cDNA 2900026A02 gene	-1.23208	0.0479715	243219_at	243219	ENSMUSG00000051339	NM_172884|NP_766472
Acot11	acyl-CoA thioesterase 11	-1.23148	0.0499762	329910_at	329910	ENSMUSG00000034853	NM_025590|NP_079866
Mtmr1	myotubularin related protein 1	-1.23079	0.0145634	53332_at	53332	ENSMUSG00000015214	NM_016985|NP_058681
Zfp105	zinc finger protein 105	-1.23064	0.0277118	22646_at	22646	ENSMUSG00000057895	NM_009544|NP_033570
LOC100504226	hypothetical protein LOC100504226	-1.23016	0.0271645	100504226_at	100504226	NA	XM_003085012|XM_003085930|XP_003085060|XP_003085978
Nras	neuroblastoma ras oncogene	-1.22992	0.0278683	18176_at	18176	ENSMUSG00000027852	NM_010937|NP_035067
Aoc2	amine oxidase, copper containing 2 (retina-specific)	-1.22972	0.016654	237940_at	237940	ENSMUSG00000078651	NM_178932|NP_849263
Il1f9	interleukin 1 family, member 9	-1.22919	0.0230071	215257_at	215257	ENSMUSG00000044103	NM_153511|NP_705731
Olfr1512	olfactory receptor 1512	-1.2288	0.0145787	258424_at	258424	ENSMUSG00000060640	NM_146432|NP_666643
Bcl11b	B-cell leukemia/lymphoma 11B	-1.2278	0.0133812	58208_at	58208	ENSMUSG00000048251	NM_001079883|NM_021399|NP_001073352|NP_067374
Tmprss12	transmembrane (C-terminal) protease, serine 12	-1.22687	0.0293969	75002_at	75002	ENSMUSG00000045631	NM_183109|NP_898932
Insl6	insulin-like 6	-1.2267	0.0347662	27356_at	27356	ENSMUSG00000050957	NM_013754|NP_038782
Pkd2	polycystic kidney disease 2	-1.22547	0.0492994	18764_at	18764	ENSMUSG00000034462	NM_008861|NP_032887
Pbrm1	polybromo 1	-1.22514	0.0480625	66923_at	66923	ENSMUSG00000042323	NM_001081251|NP_001074720
Mum1	melanoma associated antigen (mutated) 1	-1.22407	0.0334151	68114_at	68114	ENSMUSG00000020156	NM_023431|NP_075920
Igfbp5	insulin-like growth factor binding protein 5	-1.22392	0.0157546	16011_at	16011	ENSMUSG00000026185	NM_010518|NP_034648
Fam102b	family with sequence similarity 102, member B	-1.22375	0.0243057	329739_at	329739	ENSMUSG00000040339	NM_001163567|NP_001157039
Ehbp1	EH domain binding protein 1	-1.2234	0.0382463	216565_at	216565	ENSMUSG00000042302	NM_153078|NP_694718
Atp12a	ATPase, H+/K+ transporting, nongastric, alpha polypeptide	-1.22261	0.0109317	192113_at	192113	ENSMUSG00000022229	NM_138652|NP_619593
Tppp	tubulin polymerization promoting protein	-1.22242	0.0393219	72948_at	72948	ENSMUSG00000021573	NM_182839|NP_878259
Poc5	POC5 centriolar protein homolog (Chlamydomonas)	-1.22058	0.0258685	67463_at	67463	ENSMUSG00000021671	NM_026173|NP_080449
Mpzl1	myelin protein zero-like 1	-1.21915	0.0328953	68481_at	68481	ENSMUSG00000026566	NM_001001880|NM_001083897|NP_001001880|NP_001077366
1700028P14Rik	RIKEN cDNA 1700028P14 gene	-1.21862	0.0285647	67483_at	67483	ENSMUSG00000033053	NM_026188|NP_080464
Tjp1	tight junction protein 1	-1.21657	0.0320662	21872_at	21872	ENSMUSG00000030516	NM_001163574|NM_009386|NP_001157046|NP_033412
Sphkap	SPHK1 interactor, AKAP domain containing	-1.2161	0.0227283	77629_at	77629	ENSMUSG00000026163	NM_172430|NP_766018
Megf11	multiple EGF-like-domains 11	-1.21543	0.0324264	214058_at	214058	ENSMUSG00000036466	NM_001134399|NM_172522|NP_001127871|NP_766110
Sin3a	transcriptional regulator, SIN3A (yeast)	-1.21423	0.0345056	20466_at	20466	ENSMUSG00000042557	NM_001110350|NM_001110351|NM_011378|NP_001103820|NP_001103821|NP_035508
Epc1	enhancer of polycomb homolog 1 (Drosophila)	-1.21374	0.00362962	13831_at	13831	ENSMUSG00000024240	NM_007935|NM_027497|NP_031961|NP_081773
Setd7	SET domain containing (lysine methyltransferase) 7	-1.21326	0.0146177	73251_at	73251	ENSMUSG00000037111	NM_080793|NP_542983
Atoh1	atonal homolog 1 (Drosophila)	-1.21285	0.000442919	11921_at	11921	ENSMUSG00000073043	NM_007500|NP_031526
Dnmt3a	DNA methyltransferase 3A	-1.21065	0.0252694	13435_at	13435	ENSMUSG00000020661	NM_007872|NM_153743|NP_031898|NP_714965
3300002I08Rik	RIKEN cDNA 3300002I08 gene	-1.21038	0.00669415	69277_at	69277	ENSMUSG00000063364	NM_027017|NP_081293
Plxdc2	plexin domain containing 2	-1.21008	0.0295782	67448_at	67448	ENSMUSG00000026748	NM_026162|NP_080438
Kirrel	kin of IRRE like (Drosophila)	-1.21002	0.00270907	170643_at	170643	ENSMUSG00000041734	NM_001170985|NM_130867|NP_001164456|NP_570937
Slit3	slit homolog 3 (Drosophila)	-1.20878	0.0383611	20564_at	20564	ENSMUSG00000056427	NM_011412|NP_035542
Mtmr12	myotubularin related protein 12	-1.20878	0.00724842	268783_at	268783	ENSMUSG00000039458	NM_172958|NP_766546
Cilp	cartilage intermediate layer protein, nucleotide pyrophosphohydrolase	-1.20864	0.0288882	214425_at	214425	ENSMUSG00000042254	NM_173385|NP_775561
BC048671	cDNA sequence BC048671	-1.20846	0.0179806	243535_at	243535	ENSMUSG00000049694	NM_177738|NP_808406
Rtn4	reticulon 4	-1.20753	0.0036537	68585_at	68585	ENSMUSG00000020458	NM_024226|NM_194051|NM_194052|NM_194053|NM_194054|NP_077188|NP_918940|NP_918941|NP_918942|NP_918943
Fam176b	family with sequence similarity 176, member B	-1.20683	0.00178823	230752_at	230752	ENSMUSG00000050212	NM_172145|NP_742157
Ccdc114	coiled-coil domain containing 114	-1.2068	0.0412356	211535_at	211535	ENSMUSG00000040189	NM_001033243|NP_001028415
A930018P22Rik	RIKEN cDNA A930018P22 gene	-1.2061	0.0292876	68243_at	68243	ENSMUSG00000032671	NM_026634|NP_080910
Dok4	docking protein 4	-1.2058	0.0420018	114255_at	114255	ENSMUSG00000040631	NM_053246|NP_444476
Setd2	SET domain containing 2	-1.20554	0.0477202	235626_at	235626	ENSMUSG00000044791	NM_001081340|NP_001074809
Akap11	A kinase (PRKA) anchor protein 11	-1.20424	0.0222053	219181_at	219181	ENSMUSG00000022016	NM_001164503|NP_001157975
2410004B18Rik	RIKEN cDNA 2410004B18 gene	-1.2042	0.0130962	66421_at	66421	ENSMUSG00000036873	NM_025555|NP_079831
Acot2	acyl-CoA thioesterase 2	-1.20377	0.0360202	171210_at	171210	ENSMUSG00000021226	NM_134188|NP_598949
Smurf1	SMAD specific E3 ubiquitin protein ligase 1	-1.20346	0.0356828	75788_at	75788	ENSMUSG00000038780	NM_001038627|NM_029438|NP_001033716|NP_083714
Plin4	perilipin 4	-1.20296	0.0306779	57435_at	57435	ENSMUSG00000002831	NM_020568|NP_065593
Spnb2	spectrin beta 2	-1.20245	0.0255394	20742_at	20742	ENSMUSG00000020315	NM_009260|NM_175836|NP_033286|NP_787030
C2cd4c	C2 calcium-dependent domain containing 4C	-1.20207	0.0165011	237397_at	237397	ENSMUSG00000045912	NM_001168624|NM_198614|NP_001162095|NP_941016
2610001J05Rik	RIKEN cDNA 2610001J05 gene	-1.20202	0.0452797	66520_at	66520	NA	NR_024619
Elk3	ELK3, member of ETS oncogene family	-1.20198	0.0342526	13713_at	13713	ENSMUSG00000008398	NM_013508|NP_038536
Glipr1	GLI pathogenesis-related 1 (glioma)	-1.20116	0.0367504	73690_at	73690	ENSMUSG00000056888	NM_028608|NP_082884
Snx14	sorting nexin 14	-1.20115	0.0360619	244962_at	244962	ENSMUSG00000032422	NM_172926|NP_766514
2310002L09Rik	RIKEN cDNA 2310002L09 gene	-1.20114	0.0426539	71886_at	71886	ENSMUSG00000028396	NM_027104|NM_027981|NP_081380|NP_082257
Ssr3	signal sequence receptor, gamma	-1.20099	0.0211489	67437_at	67437	ENSMUSG00000027828	NM_026155|NP_080431
Vmn1r194	vomeronasal 1 receptor 194	-1.20097	0.0105232	626299_at	626299	ENSMUSG00000069297	NM_001080972|NP_001074441
Tatdn3	TatD DNase domain containing 3	-1.20096	0.0265302	68972_at	68972	ENSMUSG00000026632	NM_001163421|NM_001163422|NM_026895|NP_001156893|NP_001156894|NP_081171
Olfr215	olfactory receptor 215	-1.20086	0.0331032	258438_at	258438	ENSMUSG00000050654	NM_146446|NP_666657
CN725425	cDNA sequence CN725425	-1.20077	0.0431848	545126_at	545126	ENSMUSG00000078932	XR_105722|XR_106940
Gm4861	predicted gene 4861	-1.20071	0.0311751	229862_at	229862	ENSMUSG00000055138	NM_177665|NP_808333
Klhdc8a	kelch domain containing 8A	-1.20069	0.0305838	213417_at	213417	ENSMUSG00000042115	NM_144810|NP_659059
Pip4k2c	phosphatidylinositol-5-phosphate 4-kinase, type II, gamma	1.20033	0.0205787	117150_at	117150	ENSMUSG00000025417	NM_054097|NP_473438
Dalrd3	DALR anticodon binding domain containing 3	1.20057	0.0488272	67789_at	67789	ENSMUSG00000019039	NM_026378|NP_080654
Os9	amplified in osteosarcoma	1.20057	0.0150778	216440_at	216440	ENSMUSG00000040462	NM_001171026|NM_177614|NP_001164497|NP_808282
Bbs1	Bardet-Biedl syndrome 1 (human)	1.20077	0.0118901	52028_at	52028	ENSMUSG00000006464	NM_001033128|NP_001028300
4930480E11Rik	RIKEN cDNA 4930480E11 gene	1.20093	0.0415424	74910_at	74910	ENSMUSG00000035651	NM_001177966|NP_001171437
Lin28a	lin-28 homolog A (C. elegans)	1.20102	0.0414215	83557_at	83557	ENSMUSG00000050966	NM_145833|NP_665832
Gltpd2	glycolipid transfer protein domain containing 2	1.20116	0.0203473	216871_at	216871	ENSMUSG00000046811	NM_146020|NP_666132
Tapbp	TAP binding protein	1.20152	0.0211771	21356_at	21356	ENSMUSG00000024308	NM_001025313|NM_009318|NP_001020484|NP_033344
Irf8	interferon regulatory factor 8	1.20157	0.0280992	15900_at	15900	ENSMUSG00000041515	NM_008320|NP_032346
Hira	histone cell cycle regulation defective homolog A (S. cerevisiae)	1.2017	0.0287923	15260_at	15260	ENSMUSG00000022702	NM_010435|NP_034565
Hgs	HGF-regulated tyrosine kinase substrate	1.20236	0.00917454	15239_at	15239	ENSMUSG00000025793	NM_001159328|NM_008244|NP_001152800|NP_032270
Rbm28	RNA binding motif protein 28	1.20279	0.0455162	68272_at	68272	ENSMUSG00000029701	NM_133925|NP_598686
Ddrgk1	DDRGK domain containing 1	1.20293	0.0271067	77006_at	77006	ENSMUSG00000068290	NM_029832|NP_084108
Ppara	peroxisome proliferator activated receptor alpha	1.20296	0.0136051	19013_at	19013	ENSMUSG00000022383	NM_001113418|NM_011144|NP_001106889|NP_035274
Lass2	LAG1 homolog, ceramide synthase 2	1.20301	0.0466445	76893_at	76893	ENSMUSG00000015714	NM_029789|NP_084065
Leap2	liver-expressed antimicrobial peptide 2	1.20392	0.0489638	259301_at	259301	ENSMUSG00000036216	NM_153069|NP_694709
Ighv1-9	immunoglobulin heavy variable V1-9	1.2044	0.0387433	668478_at	668478	ENSMUSG00000094694	NA
Ergic3	ERGIC and golgi 3	1.20487	0.0375435	66366_at	66366	ENSMUSG00000005881	NM_025516|NP_079792
Smap2	stromal membrane-associated GTPase-activating protein 2	1.20511	0.0315707	69780_at	69780	ENSMUSG00000032870	NM_133716|NP_598477
Nfkb2	nuclear factor of kappa light polypeptide gene enhancer in B-cells 2, p49/p100	1.20539	0.00675743	18034_at	18034	ENSMUSG00000025225	NM_001177369|NM_001177370|NM_019408|NP_001170840|NP_001170841|NP_062281
Nle1	notchless homolog 1 (Drosophila)	1.20557	0.0331273	217011_at	217011	ENSMUSG00000020692	NM_145431|NP_663406
Hes6	hairy and enhancer of split 6 (Drosophila)	1.20567	0.0461211	55927_at	55927	ENSMUSG00000067071	NM_019479|NP_062352
Oit3	oncoprotein induced transcript 3	1.20605	0.0453803	18302_at	18302	ENSMUSG00000009654	NM_010959|NP_035089
Tcn2	transcobalamin 2	1.20605	0.0438938	21452_at	21452	ENSMUSG00000020432	NM_001130458|NM_001130459|NM_015749|NP_001123930|NP_001123931|NP_056564
Chrne	cholinergic receptor, nicotinic, epsilon polypeptide	1.20707	0.00296855	11448_at	11448	ENSMUSG00000014609	NM_009603|NP_033733
Cstb	cystatin B	1.20721	0.0166014	13014_at	13014	ENSMUSG00000005054	NM_007793|NP_031819
Tubgcp2	tubulin, gamma complex associated protein 2	1.20746	0.0209162	74237_at	74237	ENSMUSG00000025474	NM_133755|NP_598516
Gramd3	GRAM domain containing 3	1.20753	0.0182929	107022_at	107022	ENSMUSG00000001700	NM_026240|NP_080516
Gm129	predicted gene 129	1.20778	0.0250219	229599_at	229599	ENSMUSG00000038550	NM_001033302|NP_001028474
Naa40	N(alpha)-acetyltransferase 40, NatD catalytic subunit, homolog (S. cerevisiae)	1.20802	0.0237363	70999_at	70999	ENSMUSG00000024764	NM_027643|NP_081919
Padi4	peptidyl arginine deiminase, type IV	1.2083	0.0444325	18602_at	18602	ENSMUSG00000025330	NM_011061|NP_035191
Gm10267	predicted gene 10267	1.20896	0.0134994	100042855_at	100042855	ENSMUSG00000069385	NM_001165950|NP_001159422
Yars	tyrosyl-tRNA synthetase	1.20902	0.0222764	107271_at	107271	ENSMUSG00000028811	NM_134151|NP_598912
Avpi1	arginine vasopressin-induced 1	1.20918	0.0416513	69534_at	69534	ENSMUSG00000018821	NM_027106|NP_081382
Kcnab2	potassium voltage-gated channel, shaker-related subfamily, beta member 2	1.20983	0.0108971	16498_at	16498	ENSMUSG00000028931	NM_010598|NP_034728
Fam192a	family with sequence similarity 192, member A	1.21053	0.0450996	102122_at	102122	ENSMUSG00000031774	NM_028221|NP_082497
Nr2c1	nuclear receptor subfamily 2, group C, member 1	1.21092	0.0251509	22025_at	22025	ENSMUSG00000005897	NM_011629|NP_035759
Prdx6-ps1	peroxiredoxin 6, pseudogene 1	1.21101	0.0103327	320769_at	320769	ENSMUSG00000050114	NR_033713
Cnr2	cannabinoid receptor 2 (macrophage)	1.21111	0.0375134	12802_at	12802	ENSMUSG00000062585	NM_009924|NP_034054
Ttc24	tetratricopeptide repeat domain 24	1.21144	0.00488618	214191_at	214191	ENSMUSG00000051036	NM_172526|NP_766114
Rxra	retinoid X receptor alpha	1.2117	0.00105713	20181_at	20181	ENSMUSG00000015846	NM_011305|NP_035435
Olfr1278	olfactory receptor 1278	1.2117	0.0292692	258389_at	258389	ENSMUSG00000068647	NM_146394|NP_666506
Phyhip	phytanoyl-CoA hydroxylase interacting protein	1.21183	0.0111129	105653_at	105653	ENSMUSG00000003469	NM_145981|NP_666093
Pdzd11	PDZ domain containing 11	1.21189	0.0361926	72621_at	72621	ENSMUSG00000015668	NM_028303|NP_082579
Hs6st1	heparan sulfate 6-O-sulfotransferase 1	1.21202	0.0405802	50785_at	50785	ENSMUSG00000045216	NM_015818|NP_056633
Chmp7	CHMP family, member 7	1.21362	0.034971	105513_at	105513	ENSMUSG00000034190	NM_134078|NP_598839
Atp6v0a1	ATPase, H+ transporting, lysosomal V0 subunit A1	1.21408	0.0283008	11975_at	11975	ENSMUSG00000019302	NM_016920|NP_058616
Ppp2r1a	protein phosphatase 2 (formerly 2A), regulatory subunit A (PR 65), alpha isoform	1.21447	0.0248743	51792_at	51792	ENSMUSG00000007564	NM_016891|NP_058587
8430406I07Rik	RIKEN cDNA 8430406I07 gene	1.21457	0.0416779	74528_at	74528	ENSMUSG00000027424	NM_028984|NP_083260
Rab5c	RAB5C, member RAS oncogene family	1.21466	0.0374486	19345_at	19345	ENSMUSG00000019173	NM_024456|NP_077776
Bhmt2	betaine-homocysteine methyltransferase 2	1.21472	0.0141908	64918_at	64918	ENSMUSG00000042118	NM_022884|NP_075022
Sox10	SRY-box containing gene 10	1.2148	0.0219458	20665_at	20665	ENSMUSG00000033006	NM_011437|NP_035567
Bcas3	breast carcinoma amplified sequence 3	1.21542	0.0338314	192197_at	192197	ENSMUSG00000059439	NM_001166642|NM_001166643|NM_138681|NP_001160114|NP_001160115|NP_619622
Zfyve1	zinc finger, FYVE domain containing 1	1.21555	0.0498356	217695_at	217695	ENSMUSG00000042628	NM_183154|NP_898977
Guk1	guanylate kinase 1	1.21568	0.0294935	14923_at	14923	ENSMUSG00000020444	NM_001159410|NM_008193|NP_001152882|NP_032219
Pgpep1	pyroglutamyl-peptidase I	1.21576	0.0375981	66522_at	66522	ENSMUSG00000056204	NM_023217|NP_075706
Slc36a2	solute carrier family 36 (proton/amino acid symporter), member 2	1.21577	0.0484968	246049_at	246049	ENSMUSG00000020264	NM_153170|NP_694810
Lipc	lipase, hepatic	1.21591	0.00881334	15450_at	15450	ENSMUSG00000032207	NM_008280|NP_032306
Csnk1g1	casein kinase 1, gamma 1	1.2171	0.0182438	214897_at	214897	ENSMUSG00000032384	NM_173185|NP_775277
2310034G01Rik	RIKEN cDNA 2310034G01 gene	1.21747	0.0160444	75579_at	75579	NA	XR_105979|XR_107189
Dedd2	death effector domain-containing DNA binding protein 2	1.21752	0.0428598	67379_at	67379	ENSMUSG00000054499	NM_207677|NP_997560
Olfr538	olfactory receptor 538	1.21789	0.0229438	258201_at	258201	ENSMUSG00000066125	NM_001011867|NP_001011867
Gabrr2	gamma-aminobutyric acid (GABA) C receptor, subunit rho 2	1.21814	0.0427678	14409_at	14409	ENSMUSG00000023267	NM_008076|NP_032102
Gba	glucosidase, beta, acid	1.21816	0.0126373	14466_at	14466	ENSMUSG00000028048	NM_001077411|NM_008094|NP_001070879|NP_032120
Ubl4	ubiquitin-like 4	1.21843	0.0439832	27643_at	27643	ENSMUSG00000015290	NM_145405|NP_663380
BC021785	cDNA sequence BC021785	1.21876	0.0149876	215928_at	215928	ENSMUSG00000038528	NM_001001489|NM_001113385|NM_001113388|NP_001001489|NP_001106856|NP_001106859
2310046O06Rik	RIKEN cDNA 2310046O06 gene	1.21936	0.0398732	78323_at	78323	ENSMUSG00000032305	NM_001166364|NM_175273|NP_001159836|NP_780482
Faah	fatty acid amide hydrolase	1.21968	0.0316319	14073_at	14073	ENSMUSG00000034171	NM_010173|NP_034303
Lars	leucyl-tRNA synthetase	1.22051	0.00805948	107045_at	107045	ENSMUSG00000024493	NM_134137|NP_598898
2210408I21Rik	RIKEN cDNA 2210408I21 gene	1.22092	0.02486	72371_at	72371	ENSMUSG00000071252	NM_001081353|NM_001145676|NP_001074822|NP_001139148
Tmem37	transmembrane protein 37	1.22092	0.0257206	170706_at	170706	ENSMUSG00000050777	NM_019432|NP_062305
Tusc5	tumor suppressor candidate 5	1.22094	0.024296	237858_at	237858	ENSMUSG00000046275	NM_177709|NP_808377
Nubp2	nucleotide binding protein 2	1.22101	0.0493066	26426_at	26426	ENSMUSG00000039183	NM_011956|NP_036086
Gpr115	G protein-coupled receptor 115	1.22106	0.0226457	78249_at	78249	ENSMUSG00000023918	NM_030067|NP_084343
Xab2	XPA binding protein 2	1.22108	0.00143723	67439_at	67439	ENSMUSG00000019470	NM_026156|NP_080432
Bckdha	branched chain ketoacid dehydrogenase E1, alpha polypeptide	1.22156	0.0339455	12039_at	12039	ENSMUSG00000060376	NM_007533|NP_031559
Stx1b	syntaxin 1B	1.22167	0.0106119	56216_at	56216	ENSMUSG00000030806	NM_024414|NP_077725
Ulk1	Unc-51 like kinase 1 (C. elegans)	1.22226	0.014679	22241_at	22241	ENSMUSG00000029512	NM_009469|NP_033495
Jmy	junction-mediating and regulatory protein	1.22231	0.0283487	57748_at	57748	ENSMUSG00000021690	NM_021310|NP_067285
Oas1b	2'-5' oligoadenylate synthetase 1B	1.22245	0.0235237	23961_at	23961	ENSMUSG00000029605	NM_001083925|NP_001077394|NR_003507
Supv3l1	suppressor of var1, 3-like 1 (S. cerevisiae)	1.22284	0.0430693	338359_at	338359	ENSMUSG00000020079	NM_181423|NP_852088
Gm9966	predicted gene 9966	1.22341	0.00312371	791297_at	791297	ENSMUSG00000055099	XM_003084710|XP_003084758
Sytl4	synaptotagmin-like 4	1.22382	0.0372903	27359_at	27359	ENSMUSG00000031255	NM_013757|NP_038785
Zfp334	zinc finger protein 334	1.22406	0.0228644	228876_at	228876	ENSMUSG00000017667	NM_178411|NP_848498
Cpsf3l	cleavage and polyadenylation specific factor 3-like	1.22408	0.0405919	71957_at	71957	ENSMUSG00000029034	NM_028020|NP_082296
Slc2a8	solute carrier family 2, (facilitated glucose transporter), member 8	1.22469	0.0272694	56017_at	56017	ENSMUSG00000026791	NM_019488|NP_062361
Cgrrf1	cell growth regulator with ring finger domain 1	1.22488	0.0183583	68755_at	68755	ENSMUSG00000055128	NM_026832|NP_081108
Ddx25	DEAD (Asp-Glu-Ala-Asp) box polypeptide 25	1.22496	0.0405841	30959_at	30959	ENSMUSG00000032101	NM_013932|NP_038960
Inpp1	inositol polyphosphate-1-phosphatase	1.22545	0.0191508	16329_at	16329	ENSMUSG00000026102	NM_008384|NP_032410
Rrp36	ribosomal RNA processing 36 homolog (S. cerevisiae)	1.22545	0.0206138	224823_at	224823	ENSMUSG00000023971	NM_144857|NP_659106
Cad	carbamoyl-phosphate synthetase 2, aspartate transcarbamylase, and dihydroorotase	1.22553	0.0327158	69719_at	69719	ENSMUSG00000013629	NM_023525|NP_076014
Vtn	vitronectin	1.22571	0.0104794	22370_at	22370	ENSMUSG00000017344	NM_011707|NP_035837
Dhx38	DEAH (Asp-Glu-Ala-His) box polypeptide 38	1.22624	0.0138605	64340_at	64340	ENSMUSG00000037993	NM_178380|NP_848467
Dcaf12	DDB1 and CUL4 associated factor 12	1.22655	0.00582013	68970_at	68970	ENSMUSG00000028436	NM_026893|NP_081169
Hint2	histidine triad nucleotide binding protein 2	1.22659	0.0318416	68917_at	68917	ENSMUSG00000028470	NM_026871|NP_081147
Olfr881	olfactory receptor 881	1.22685	0.0258371	258413_at	258413	ENSMUSG00000060583	NM_146418|NP_666530
4933409G03Rik	RIKEN cDNA 4933409G03 gene	1.22749	0.017036	227998_at	227998	ENSMUSG00000053896	NM_177651|NP_808319
E130309D02Rik	RIKEN cDNA E130309D02 gene	1.22754	0.0149577	231868_at	231868	ENSMUSG00000039244	NM_172726|NP_766314
Omt2a	oocyte maturation, alpha	1.22775	0.019727	18379_at	18379	ENSMUSG00000066463	NM_001111286|NM_001164523|NP_001104756|NP_001157995
Slc38a10	solute carrier family 38, member 10	1.22817	0.0166797	72055_at	72055	ENSMUSG00000061306	NM_001164798|NM_001164799|NM_001164800|NM_001164801|NM_001164802|NM_024249|NP_001158270|NP_001158271|NP_001158272|NP_001158273|NP_001158274|NP_077211
Dtwd1	DTW domain containing 1	1.22859	0.00804011	69185_at	69185	ENSMUSG00000023330	NM_026981|NP_081257
Poli	polymerase (DNA directed), iota	1.2286	0.0138314	26447_at	26447	ENSMUSG00000038425	NM_001136090|NM_011972|NP_001129562|NP_036102
Fkbp8	FK506 binding protein 8	1.22861	0.0450102	14232_at	14232	ENSMUSG00000019428	NM_001111066|NM_001199631|NM_010223|NP_001104536|NP_001186560|NP_034353
Tmem20	transmembrane protein 20	1.22897	0.0269485	240660_at	240660	ENSMUSG00000044026	NM_175507|NP_780716
Fndc8	fibronectin type III domain containing 8	1.22935	0.0176164	78919_at	78919	ENSMUSG00000018844	NM_030224|NP_084500
Chmp6	chromatin modifying protein 6	1.22968	0.0223954	208092_at	208092	ENSMUSG00000025371	NM_001085498|NP_001078967
Ighv7-2	immunoglobulin heavy variable V7-2	1.22979	0.0135352	780800_at	780800	ENSMUSG00000076653	NA
Olfr905	olfactory receptor 905	1.22982	0.0142541	258800_at	258800	ENSMUSG00000046455	NM_146804|NP_667015
Dnase2b	deoxyribonuclease II beta	1.23079	0.0466067	56629_at	56629	ENSMUSG00000028185	NM_019957|NP_064341
Pdc	phosducin	1.23107	0.0356085	20028_at	20028	ENSMUSG00000006007	NM_001159730|NM_024458|NP_001153202|NP_077778
Ap3s2	adaptor-related protein complex 3, sigma 2 subunit	1.23124	0.0289558	11778_at	11778	ENSMUSG00000063801	NM_009682|NP_033812
Il1r1	interleukin 1 receptor, type I	1.23128	0.0426481	16177_at	16177	ENSMUSG00000026072	NM_001123382|NM_008362|NP_001116854|NP_032388
Dgkd	diacylglycerol kinase, delta	1.23149	0.0226475	227333_at	227333	ENSMUSG00000070738	NM_177646|NP_808314
Hagh	hydroxyacyl glutathione hydrolase	1.23197	0.00826163	14651_at	14651	ENSMUSG00000024158	NM_001159626|NM_024284|NP_001153098|NP_077246
Mtmr10	myotubularin related protein 10	1.23244	0.0425667	233315_at	233315	ENSMUSG00000030522	NM_172742|NP_766330
Cdk10	cyclin-dependent kinase 10	1.23249	0.0125781	234854_at	234854	ENSMUSG00000033862	NM_194444|NM_194446|NP_919426|NP_919428
Gla	galactosidase, alpha	1.23267	0.00589266	11605_at	11605	ENSMUSG00000031266	NM_013463|NP_038491
1700057K13Rik	RIKEN cDNA 1700057K13 gene	1.23269	0.0395791	73435_at	73435	ENSMUSG00000026592	NM_028540|NP_082816
Slc38a5	solute carrier family 38, member 5	1.23276	0.0427809	209837_at	209837	ENSMUSG00000031170	NM_172479|NP_766067
Pecr	peroxisomal trans-2-enoyl-CoA reductase	1.23325	0.0115115	111175_at	111175	ENSMUSG00000026189	NM_023523|NP_076012
Gtf3c5	general transcription factor IIIC, polypeptide 5	1.23354	0.00781593	70239_at	70239	ENSMUSG00000026816	NM_148928|NP_683730
Rce1	RCE1 homolog, prenyl protein peptidase (S. cerevisiae)	1.23361	0.0329346	19671_at	19671	ENSMUSG00000024889	NM_023131|NP_075620
Zc3h12d	zinc finger CCCH type containing 12D	1.23387	0.0199004	237256_at	237256	ENSMUSG00000039981	NM_172785|NP_766373
Fam71e2	family with sequence similarity 71, member E2	1.23402	0.00844199	243822_at	243822	ENSMUSG00000092518	NM_172895|NP_766483
Mro	maestro	1.23403	0.0130053	71263_at	71263	ENSMUSG00000064036	NM_027741|NP_082017
0610011F06Rik	RIKEN cDNA 0610011F06 gene	1.23408	0.0176291	68347_at	68347	ENSMUSG00000025731	NM_026686|NP_080962
Cd19	CD19 antigen	1.23416	0.038222	12478_at	12478	ENSMUSG00000030724	NM_009844|NP_033974
Cnga4	cyclic nucleotide gated channel alpha 4	1.23431	0.0279612	233649_at	233649	ENSMUSG00000030897	NM_001033317|NP_001028489
Angptl6	angiopoietin-like 6	1.23446	0.0454998	70726_at	70726	ENSMUSG00000038742	NM_145154|NP_660136
Zfp36	zinc finger protein 36	1.2351	0.0181456	22695_at	22695	ENSMUSG00000044786	NM_011756|NP_035886
Sepx1	selenoprotein X 1	1.23547	0.0400814	27361_at	27361	ENSMUSG00000075705	NM_013759|NP_038787
1700096K18Rik	RIKEN cDNA 1700096K18 gene	1.23578	0.0178706	73571_at	73571	NA	NR_027388
Ttc36	tetratricopeptide repeat domain 36	1.23649	0.0495729	192653_at	192653	ENSMUSG00000039438	NM_138951|NP_620401
Akr7a5	aldo-keto reductase family 7, member A5 (aflatoxin aldehyde reductase)	1.23669	0.0232708	110198_at	110198	ENSMUSG00000028743	NM_025337|NP_079613
Pgm3	phosphoglucomutase 3	1.23672	0.0452749	109785_at	109785	ENSMUSG00000056131	NM_001163746|NM_028352|NP_001157218|NP_082628
Naprt1	nicotinate phosphoribosyltransferase domain containing 1	1.2372	0.00502597	223646_at	223646	ENSMUSG00000022574	NM_172607|NP_766195
Tmem160	transmembrane protein 160	1.2373	0.0239033	69094_at	69094	ENSMUSG00000019158	NM_026938|NP_081214
Asb6	ankyrin repeat and SOCS box-containing 6	1.23745	0.0347856	72323_at	72323	ENSMUSG00000039483	NM_133346|NP_579924
Klhl20	kelch-like 20 (Drosophila)	1.23773	0.0412718	226541_at	226541	ENSMUSG00000026705	NM_001039482|NP_001034571
Cd200r1	CD200 receptor 1	1.23774	0.0430781	57781_at	57781	ENSMUSG00000022667	NM_021325|NP_067300
Cerk	ceramide kinase	1.23829	0.0213334	223753_at	223753	ENSMUSG00000035891	NM_145475|NP_663450
Slc5a12	solute carrier family 5 (sodium/glucose cotransporter), member 12	1.23867	0.00407805	241612_at	241612	ENSMUSG00000041644	NM_001003915|NM_001177624|NP_001003915|NP_001171095
Krtap31-1	keratin associated protein 31-1	1.23871	0.0150503	70831_at	70831	ENSMUSG00000070334	NM_027568|NP_081844
1110031I02Rik	RIKEN cDNA 1110031I02 gene	1.23899	0.0345203	66179_at	66179	ENSMUSG00000025169	NM_025402|NP_079678
Ier3	immediate early response 3	1.23945	0.049834	15937_at	15937	ENSMUSG00000003541	NM_133662|NP_598423
Lsm4	LSM4 homolog, U6 small nuclear RNA associated (S. cerevisiae)	1.23967	0.0101428	50783_at	50783	ENSMUSG00000031848	NM_015816|NP_056631
Cd82	CD82 antigen	1.2401	0.0147198	12521_at	12521	ENSMUSG00000027215	NM_001136055|NM_007656|NP_001129527|NP_031682
Dctd	dCMP deaminase	1.24016	0.00725293	320685_at	320685	ENSMUSG00000031562	NM_001161515|NM_001161516|NM_178788|NP_001154987|NP_001154988|NP_848903|NR_027759
Nr1h2	nuclear receptor subfamily 1, group H, member 2	1.24072	0.0480453	22260_at	22260	ENSMUSG00000060601	NM_009473|NP_033499
Tbc1d10c	TBC1 domain family, member 10c	1.24076	0.0393953	108995_at	108995	ENSMUSG00000040247	NM_178650|NP_848765
Agmat	agmatine ureohydrolase (agmatinase)	1.24117	0.0495546	75986_at	75986	ENSMUSG00000040706	NM_001081408|NP_001074877
Prl3b1	prolactin family 3, subfamily b, member 1	1.24137	0.0037208	18776_at	18776	ENSMUSG00000038891	NM_008865|NP_032891
Lpin2	lipin 2	1.24187	0.04822	64898_at	64898	ENSMUSG00000024052	NM_001164885|NM_022882|NP_001158357|NP_075020
Ccdc74a	coiled-coil domain containing 74A	1.24295	0.0359083	72315_at	72315	ENSMUSG00000041617	NM_001166164|NP_001159636
Pid1	phosphotyrosine interaction domain containing 1	1.24361	0.0404781	98496_at	98496	ENSMUSG00000045658	NM_001003948|NP_001003948
Stk32b	serine/threonine kinase 32B	1.24373	0.00507245	64293_at	64293	ENSMUSG00000029123	NM_022416|NP_071861
Plekhb2	pleckstrin homology domain containing, family B (evectins) member 2	1.24375	0.0131767	226971_at	226971	ENSMUSG00000026123	NM_145516|NP_663491
Ganab	alpha glucosidase 2 alpha neutral subunit	1.24435	0.00887584	14376_at	14376	ENSMUSG00000071650	NM_008060|NP_032086
Aldh3b1	aldehyde dehydrogenase 3 family, member B1	1.24507	0.031881	67689_at	67689	ENSMUSG00000024885	NM_026316|NP_080592
1700112E06Rik	RIKEN cDNA 1700112E06 gene	1.24515	0.00482454	76633_at	76633	ENSMUSG00000063458	NM_028275|NP_082551
1700106N22Rik	RIKEN cDNA 1700106N22 gene	1.24517	0.0427203	73582_at	73582	ENSMUSG00000071037	NM_028576|NP_082852
Fam105b	family with sequence similarity 105, member B	1.24578	0.00684707	432940_at	432940	ENSMUSG00000046034	NM_001013792|NP_001013814
Galns	galactosamine (N-acetyl)-6-sulfate sulfatase	1.24632	0.00689984	50917_at	50917	ENSMUSG00000015027	NM_001193645|NM_016722|NP_001180574|NP_057931
Cnksr3	Cnksr family member 3	1.24765	0.0468179	215748_at	215748	ENSMUSG00000015202	NM_172546|NP_766134
Slc25a22	solute carrier family 25 (mitochondrial carrier, glutamate), member 22	1.24865	0.0328389	68267_at	68267	ENSMUSG00000019082	NM_001177576|NM_026646|NP_001171047|NP_080922
Gale	galactose-4-epimerase, UDP	1.24874	0.0404515	74246_at	74246	ENSMUSG00000028671	NM_178389|NP_848476
Cdc34	cell division cycle 34 homolog (S. cerevisiae)	1.24925	0.0474685	216150_at	216150	ENSMUSG00000020307	NM_177613|NP_808281
Isg20	interferon-stimulated protein	1.2493	0.0029791	57444_at	57444	ENSMUSG00000039236	NM_001113527|NM_020583|NP_001106999|NP_065608
Fam54a	family with sequence similarity 54, member A	1.24951	0.0215997	71804_at	71804	ENSMUSG00000019992	NM_027930|NP_082206
Add2	adducin 2 (beta)	1.24966	0.0176139	11519_at	11519	ENSMUSG00000030000	NM_013458|NP_038486
Etnk2	ethanolamine kinase 2	1.24976	0.00523178	214253_at	214253	ENSMUSG00000070644	NM_175443|NP_780652
Slc39a14	solute carrier family 39 (zinc transporter), member 14	1.24976	0.0455985	213053_at	213053	ENSMUSG00000022094	NM_001135151|NM_001135152|NM_144808|NP_001128623|NP_001128624|NP_659057
Atp4a	ATPase, H+/K+ exchanging, gastric, alpha polypeptide	1.25033	0.0314013	11944_at	11944	ENSMUSG00000005553	NM_018731|NP_061201
Zfp598	zinc finger protein 598	1.25039	0.0442224	213753_at	213753	ENSMUSG00000041130	NM_183149|NP_898972
Txn2	thioredoxin 2	1.25053	0.0393341	56551_at	56551	ENSMUSG00000005354	NM_019913|NP_064297
Gm885	predicted gene 885	1.25084	0.033129	380732_at	380732	ENSMUSG00000040528	NM_001033435|NP_001028607
Abcb11	ATP-binding cassette, sub-family B (MDR/TAP), member 11	1.25142	0.0361601	27413_at	27413	ENSMUSG00000027048	NM_021022|NP_066302
Sec14l2	SEC14-like 2 (S. cerevisiae)	1.25147	0.0461661	67815_at	67815	ENSMUSG00000003585	NM_144520|NP_653103
Olfr376	olfactory receptor 376	1.25213	0.0229134	258924_at	258924	ENSMUSG00000063881	NM_001172686|NM_146922|NP_001166157|NP_667133
Lztr1	leucine-zipper-like transcriptional regulator, 1	1.25222	0.0213758	66863_at	66863	ENSMUSG00000022761	NM_025808|NP_080084
Setd8	SET domain containing (lysine methyltransferase) 8	1.25245	0.0469805	67956_at	67956	ENSMUSG00000049327	NM_030241|NP_084517
Ppie	peptidylprolyl isomerase E (cyclophilin E)	1.25247	0.0196379	56031_at	56031	ENSMUSG00000028651	NM_019489|NP_062362
Soat1	sterol O-acyltransferase 1	1.25266	0.011819	20652_at	20652	ENSMUSG00000026600	NM_009230|NP_033256
Abtb1	ankyrin repeat and BTB (POZ) domain containing 1	1.25271	0.0287029	80283_at	80283	ENSMUSG00000030083	NM_030251|NP_084527
Thnsl2	threonine synthase-like 2 (bacterial)	1.25285	0.0396799	232078_at	232078	ENSMUSG00000054474	NM_001033929|NM_178413|NP_001029101|NP_848500
Tpmt	thiopurine methyltransferase	1.25312	0.0326612	22017_at	22017	ENSMUSG00000021376	NM_016785|NP_058065
Fpgs	folylpolyglutamyl synthetase	1.25333	0.0183671	14287_at	14287	ENSMUSG00000009566	NM_010236|NP_034366
Trappc9	trafficking protein particle complex 9	1.2541	0.0199117	76510_at	76510	ENSMUSG00000047921	NM_001164641|NM_001164642|NM_001164643|NM_029640|NM_180662|NP_001158113|NP_001158114|NP_001158115|NP_083916|NP_850993
2010001M09Rik	RIKEN cDNA 2010001M09 gene	1.25438	0.0254177	69816_at	69816	ENSMUSG00000024353	NM_027222|NP_081498
Pcnxl3	pecanex-like 3 (Drosophila)	1.2544	0.0275005	104401_at	104401	ENSMUSG00000054874	NM_144868|NP_659117
Dnajb2	DnaJ (Hsp40) homolog, subfamily B, member 2	1.25472	0.015766	56812_at	56812	ENSMUSG00000026203	NM_001159883|NM_001159884|NM_001159885|NM_020266|NM_178055|NP_001153355|NP_001153356|NP_001153357|NP_064662|NP_835156
Apex2	apurinic/apyrimidinic endonuclease 2	1.25535	0.0350899	77622_at	77622	ENSMUSG00000025269	NM_029943|NP_084219
Ankrd22	ankyrin repeat domain 22	1.25543	0.0156764	52024_at	52024	ENSMUSG00000024774	NM_024204|NP_077166
Klhl25	kelch-like 25 (Drosophila)	1.25556	0.00619681	207952_at	207952	ENSMUSG00000055652	NM_001122780|NM_029652|NM_182782|NP_001116252|NP_083928|NP_877583
Arhgap30	Rho GTPase activating protein 30	1.25637	0.0091203	226652_at	226652	ENSMUSG00000048865	NM_001005508|NP_001005508
Zfp511	zinc finger protein 511	1.25681	0.028342	69752_at	69752	ENSMUSG00000025470	NM_027201|NP_081477
Rab3d	RAB3D, member RAS oncogene family	1.25711	0.00553677	19340_at	19340	ENSMUSG00000019066	NM_031874|NP_114080
Aprt	adenine phosphoribosyl transferase	1.25721	0.0354683	11821_at	11821	ENSMUSG00000006589	NM_009698|NP_033828
Cdh3	cadherin 3	1.25739	0.0084839	12560_at	12560	ENSMUSG00000061048	NM_001037809|NM_007665|NP_001032898|NP_031691
Gpd1l	glycerol-3-phosphate dehydrogenase 1-like	1.25745	0.0130142	333433_at	333433	ENSMUSG00000050627	NM_175380|NP_780589
Pcx	pyruvate carboxylase	1.25937	0.0162728	18563_at	18563	ENSMUSG00000024892	NM_001162946|NM_008797|NP_001156418|NP_032823
Klc4	kinesin light chain 4	1.25962	0.0213843	74764_at	74764	ENSMUSG00000003546	NM_029091|NP_083367
AU040320	expressed sequence AU040320	1.25986	0.0142297	100317_at	100317	ENSMUSG00000028830	NM_001035525|NM_001035526|NM_133886|NP_001030602|NP_001030603|NP_598647
Itgb4	integrin beta 4	1.25992	0.0265414	192897_at	192897	ENSMUSG00000020758	NM_001005608|NM_133663|NP_001005608|NP_598424
Cyp2d40	cytochrome P450, family 2, subfamily d, polypeptide 40	1.26116	0.0114105	71754_at	71754	ENSMUSG00000068083	NM_023623|NP_076112
Tapbpl	TAP binding protein-like	1.26174	0.0483736	213233_at	213233	ENSMUSG00000038213	NM_145391|NP_663366
Insc	inscuteable homolog (Drosophila)	1.2632	0.0137131	233752_at	233752	ENSMUSG00000048782	NM_173767|NP_776128
Map3k13	mitogen-activated protein kinase kinase kinase 13	1.2633	0.023086	71751_at	71751	ENSMUSG00000033618	NM_172821|NP_766409
C030006K11Rik	RIKEN cDNA C030006K11 gene	1.26348	0.0105349	223665_at	223665	ENSMUSG00000079002	NM_145472|NM_176828|NP_663447|NP_789798
Fam83g	family with sequence similarity 83, member G	1.26453	0.0366904	69640_at	69640	ENSMUSG00000042377	NM_178618|NP_848733
Speer5-ps1	spermatogenesis associated glutamate (E)-rich protein 5, pseudogene 1	1.26522	0.0280467	70365_at	70365	ENSMUSG00000091358	NR_001582|NR_027506
Paqr9	progestin and adipoQ receptor family member IX	1.26559	0.00363164	75552_at	75552	ENSMUSG00000064225	NM_198414|NP_940806
Dtnbp1	dystrobrevin binding protein 1	1.26579	0.0286867	94245_at	94245	ENSMUSG00000057531	NM_025772|NP_080048
Slc25a44	solute carrier family 25, member 44	1.26712	0.0160907	229517_at	229517	ENSMUSG00000050144	NM_001145876|NM_001145877|NM_178696|NP_001139348|NP_001139349|NP_848811|NR_027357
Slamf1	signaling lymphocytic activation molecule family member 1	1.26717	0.00185589	27218_at	27218	ENSMUSG00000015316	NM_013730|NP_038758
Slc30a10	solute carrier family 30, member 10	1.26759	0.0312117	226781_at	226781	ENSMUSG00000026614	NM_001033286|NP_001028458
Tmem120a	transmembrane protein 120A	1.2682	0.0256319	215210_at	215210	ENSMUSG00000039886	NM_172541|NP_766129
Mat1a	methionine adenosyltransferase I, alpha	1.26887	0.0194996	11720_at	11720	ENSMUSG00000037798	NM_133653|NP_598414
Chi3l1	chitinase 3-like 1	1.269	0.0498413	12654_at	12654	ENSMUSG00000064246	NM_007695|NP_031721
Tmem106a	transmembrane protein 106A	1.26922	0.0321619	217203_at	217203	ENSMUSG00000034947	NM_144830|NP_659079
Akna	AT-hook transcription factor	1.2695	0.0146213	100182_at	100182	ENSMUSG00000039158	NM_001045514|NP_001038979
Psg19	pregnancy specific glycoprotein 19	1.26967	0.0468827	26439_at	26439	ENSMUSG00000004542	NM_011964|NP_036094
Slc38a3	solute carrier family 38, member 3	1.26984	0.0392233	76257_at	76257	ENSMUSG00000010064	NM_001199217|NM_001199218|NM_023805|NP_001186146|NP_001186147|NP_076294
Masp2	mannan-binding lectin serine peptidase 2	1.27033	0.0116643	17175_at	17175	ENSMUSG00000028979	NM_001003893|NM_010767|NP_001003893|NP_034897
AI661453	expressed sequence AI661453	1.27052	0.00256994	224833_at	224833	ENSMUSG00000034382	NM_145489|NP_663464
Fpr1	formyl peptide receptor 1	1.27173	0.0369671	14293_at	14293	ENSMUSG00000045551	NM_013521|NP_038549
Mavs	mitochondrial antiviral signaling protein	1.27224	0.0298931	228607_at	228607	ENSMUSG00000037523	NM_144888|NP_659137
Slc6a13	solute carrier family 6 (neurotransmitter transporter, GABA), member 13	1.27274	0.0212401	14412_at	14412	ENSMUSG00000030108	NM_144512|NP_653095
Slc7a4	solute carrier family 7 (cationic amino acid transporter, y+ system), member 4	1.27316	0.0202434	224022_at	224022	ENSMUSG00000022756	NM_144852|NP_659101
Tbc1d13	TBC1 domain family, member 13	1.27319	0.0136697	70296_at	70296	ENSMUSG00000039678	NM_146252|NP_666364
Slc48a1	solute carrier family 48 (heme transporter), member 1	1.27374	0.0116805	67739_at	67739	ENSMUSG00000081534	NM_026353|NP_080629
Pet112l	PET112-like (yeast)	1.27472	0.0170776	229487_at	229487	ENSMUSG00000028085	NM_144896|NP_659145
Mipep	mitochondrial intermediate peptidase	1.27518	0.0127412	70478_at	70478	ENSMUSG00000021993	NM_027436|NP_081712
Ebp	phenylalkylamine Ca2+ antagonist (emopamil) binding protein	1.2752	0.0208995	13595_at	13595	ENSMUSG00000031168	NM_007898|NP_031924
Ldlrap1	low density lipoprotein receptor adaptor protein 1	1.27592	0.0261549	100017_at	100017	ENSMUSG00000037295	NM_145554|NP_663529
Clec4g	C-type lectin domain family 4, member g	1.27683	0.0212506	75863_at	75863	ENSMUSG00000074491	NM_029465|NP_083741
Slc15a4	solute carrier family 15, member 4	1.27711	0.00105165	100561_at	100561	ENSMUSG00000029416	NM_133895|NP_598656
2810432D09Rik	RIKEN cDNA 2810432D09 gene	1.27712	0.0101082	69961_at	69961	ENSMUSG00000036114	NM_027278|NP_081554
Il7r	interleukin 7 receptor	1.27818	0.0203402	16197_at	16197	ENSMUSG00000003882	NM_008372|NP_032398
Tmed1	transmembrane emp24 domain containing 1	1.2783	0.0154943	17083_at	17083	ENSMUSG00000032180	NM_010744|NP_034874
Mzt2	mitotic spindle organizing protein 2	1.27855	0.0351836	72083_at	72083	ENSMUSG00000022671	NM_029354|NP_083630
Ccdc134	coiled-coil domain containing 134	1.27888	0.0162382	76457_at	76457	ENSMUSG00000068114	NM_172428|NP_766016
Palmd	palmdelphin	1.27897	0.0249958	114301_at	114301	ENSMUSG00000033377	NM_023245|NP_075734
Mxd1	MAX dimerization protein 1	1.27905	0.0111548	17119_at	17119	ENSMUSG00000001156	NM_010751|NP_034881
Tsta3	tissue specific transplantation antigen P35B	1.27922	0.0114003	22122_at	22122	ENSMUSG00000022570	NM_031201|NP_112478
Cyp4v3	cytochrome P450, family 4, subfamily v, polypeptide 3	1.27935	0.0219782	102294_at	102294	ENSMUSG00000079057	NM_133969|NP_598730
1810031K17Rik	RIKEN cDNA 1810031K17 gene	1.2807	0.000970301	69171_at	69171	ENSMUSG00000033159	NM_026977|NP_081253
Prtg	protogenin homolog (Gallus gallus)	1.28077	0.0263942	235472_at	235472	ENSMUSG00000036030	NM_175485|NP_780694
Kif18b	kinesin family member 18B	1.28096	0.0194582	70218_at	70218	ENSMUSG00000051378	NM_197959|NP_932063
Sigmar1	sigma non-opioid intracellular receptor 1	1.28137	0.00185206	18391_at	18391	ENSMUSG00000036078	NM_011014|NP_035144
Tmem125	transmembrane protein 125	1.28143	0.0375693	230678_at	230678	ENSMUSG00000050854	NM_172383|NP_759015
Derl1	Der1-like domain family, member 1	1.28259	0.00332972	67819_at	67819	ENSMUSG00000022365	NM_024207|NP_077169
Cox19	COX19 cytochrome c oxidase assembly homolog (S. cerevisiae)	1.2832	0.0477648	68033_at	68033	ENSMUSG00000045438	NM_197980|NP_932097
Ube2g2	ubiquitin-conjugating enzyme E2G 2	1.28486	0.0206616	22213_at	22213	ENSMUSG00000009293	NM_019803|NP_062777
Hkdc1	hexokinase domain containing 1	1.28509	0.00780859	216019_at	216019	ENSMUSG00000020080	NM_145419|NP_663394
Rhoh	ras homolog gene family, member H	1.28519	0.00795293	74734_at	74734	ENSMUSG00000029204	NM_001081105|NP_001074574
Zfp707	zinc finger protein 707	1.28559	0.0336108	69020_at	69020	ENSMUSG00000034429	NM_001081065|NP_001074534
Mpzl2	myelin protein zero-like 2	1.28583	0.0252888	14012_at	14012	ENSMUSG00000032092	NM_007962|NP_031988
Nans	N-acetylneuraminic acid synthase (sialic acid synthase)	1.28596	0.0323207	94181_at	94181	ENSMUSG00000028334	NM_053179|NP_444409
Atxn7l1	ataxin 7-like 1	1.28697	0.0031771	380753_at	380753	ENSMUSG00000020564	NM_001033436|NM_028139|NP_001028608|NP_082415
Stat5a	signal transducer and activator of transcription 5A	1.28769	0.00899993	20850_at	20850	ENSMUSG00000004043	NM_001164062|NM_011488|NP_001157534|NP_035618
Rbm43	RNA binding motif protein 43	1.28824	0.00659574	71684_at	71684	ENSMUSG00000036249	NM_001141981|NM_001141982|NM_030243|NP_001135453|NP_001135454|NP_084519
Aqp8	aquaporin 8	1.28859	0.020108	11833_at	11833	ENSMUSG00000030762	NM_001109045|NM_007474|NP_001102515|NP_031500
Plbd1	phospholipase B domain containing 1	1.28874	0.0435492	66857_at	66857	ENSMUSG00000030214	NM_025806|NP_080082
2810408M09Rik	RIKEN cDNA 2810408M09 gene	1.28927	0.0228908	381406_at	381406	ENSMUSG00000039725	NM_001007581|NP_001007582
Itih1	inter-alpha trypsin inhibitor, heavy chain 1	1.28932	0.0198214	16424_at	16424	ENSMUSG00000006529	NM_008406|NP_032432
Ttc27	tetratricopeptide repeat domain 27	1.28945	0.0386737	74196_at	74196	ENSMUSG00000024078	NM_152817|NP_690030
Slc4a1ap	solute carrier family 4 (anion exchanger), member 1, adaptor protein	1.28948	0.0157275	20534_at	20534	ENSMUSG00000029141	NM_009206|NP_033232
5430417L22Rik	RIKEN cDNA 5430417L22 gene	1.28986	0.00240594	100043272_at	100043272	NA	NR_030716
Chchd5	coiled-coil-helix-coiled-coil-helix domain containing 5	1.28998	0.0378294	66170_at	66170	ENSMUSG00000037938	NM_025395|NP_079671
Adam26a	a disintegrin and metallopeptidase domain 26A (testase 3)	1.29043	0.0153428	13525_at	13525	ENSMUSG00000048516	NM_010085|NP_034215
Rnf212	ring finger protein 212	1.29097	0.0123726	671564_at	671564	ENSMUSG00000055385	XM_001475859|XM_001476621|XP_001475909|XP_001476671
Hp	haptoglobin	1.29194	0.0307649	15439_at	15439	ENSMUSG00000031722	NM_017370|NP_059066
Smad6	MAD homolog 6 (Drosophila)	1.29222	0.0336221	17130_at	17130	ENSMUSG00000036867	NM_008542|NP_032568
Exosc5	exosome component 5	1.29248	0.0221661	27998_at	27998	ENSMUSG00000061286	NM_138586|NP_613052
Fam81b	family with sequence similarity 81, member B	1.29292	0.0323696	238726_at	238726	ENSMUSG00000078966	XM_138722|XP_138722
Olfr402	olfactory receptor 402	1.2934	0.00473301	258703_at	258703	ENSMUSG00000070379	NM_146708|NP_666919
2610528E23Rik	RIKEN cDNA 2610528E23 gene	1.29377	0.00457558	66497_at	66497	ENSMUSG00000022748	NM_025599|NP_079875
Gaa	glucosidase, alpha, acid	1.29491	0.0191226	14387_at	14387	ENSMUSG00000025579	NM_001159324|NM_008064|NP_001152796|NP_032090
Gpd1	glycerol-3-phosphate dehydrogenase 1 (soluble)	1.2951	0.018561	14555_at	14555	ENSMUSG00000023019	NM_010271|NP_034401
A1cf	APOBEC1 complementation factor	1.29531	0.0125073	69865_at	69865	ENSMUSG00000052595	NM_001081074|NP_001074543
Oprd1	opioid receptor, delta 1	1.29644	0.00309904	18386_at	18386	ENSMUSG00000050511	NM_013622|NP_038650
Rnf214	ring finger protein 214	1.29648	0.00805175	235315_at	235315	ENSMUSG00000042790	NM_178709|NP_848824
Stxbp2	syntaxin binding protein 2	1.29657	0.0264867	20911_at	20911	ENSMUSG00000004626	NM_011503|NP_035633
Atg4d	autophagy-related 4D (yeast)	1.2966	0.0198984	235040_at	235040	ENSMUSG00000002820	NM_153583|NP_705811
Abhd12	abhydrolase domain containing 12	1.2973	0.0447489	76192_at	76192	ENSMUSG00000032046	NM_024465|NP_077785
Olfr809	olfactory receptor 809	1.29857	0.00892243	258321_at	258321	ENSMUSG00000050251	NM_146324|NP_666436
Sec14l4	SEC14-like 4 (S. cerevisiae)	1.29874	0.00527032	103655_at	103655	ENSMUSG00000019368	NM_146013|NP_666125
Hcls1	hematopoietic cell specific Lyn substrate 1	1.29912	0.0107978	15163_at	15163	ENSMUSG00000022831	NM_008225|NP_032251
Ggt1	gamma-glutamyltransferase 1	1.29945	0.0295657	14598_at	14598	ENSMUSG00000006345	NM_008116|NP_032142
Mvk	mevalonate kinase	1.29996	0.00455168	17855_at	17855	ENSMUSG00000041939	NM_023556|NP_076045
Rhbdd1	rhomboid domain containing 1	1.30015	0.0102009	76867_at	76867	ENSMUSG00000026142	NM_001122685|NM_029777|NP_001116157|NP_084053
Alg10b	asparagine-linked glycosylation 10 homolog B (yeast, alpha-1,2-glucosyltransferase)	1.30018	0.00500009	380959_at	380959	ENSMUSG00000075470	NM_001033441|NP_001028613
Hfe	hemochromatosis	1.30036	0.0225508	15216_at	15216	ENSMUSG00000006611	NM_010424|NP_034554
Wbp2	WW domain binding protein 2	1.30061	0.0477684	22378_at	22378	ENSMUSG00000034341	NM_016852|NP_058548
Sphk1	sphingosine kinase 1	1.30111	0.00783271	20698_at	20698	ENSMUSG00000061878	NM_001172472|NM_001172473|NM_001172475|NM_011451|NM_025367|NP_001165943|NP_001165944|NP_001165946|NP_035581|NP_079643
Edem2	ER degradation enhancer, mannosidase alpha-like 2	1.30139	0.0175973	108687_at	108687	ENSMUSG00000038312	NM_145537|NP_663512
Stard5	StAR-related lipid transfer (START) domain containing 5	1.3023	0.027208	170460_at	170460	ENSMUSG00000046027	NM_023377|NP_075866
Sap30bp	SAP30 binding protein	1.30238	0.00573144	57230_at	57230	ENSMUSG00000020755	NM_020483|NP_065229
Mbl1	mannose-binding lectin (protein A) 1	1.30289	0.00375683	17194_at	17194	ENSMUSG00000037780	NM_010775|NP_034905
Ccdc68	coiled-coil domain containing 68	1.30326	0.0458695	381175_at	381175	ENSMUSG00000038903	NM_201362|NP_958750
LOC100503890	hypothetical protein LOC100503890	1.30374	0.0412982	100503890_at	100503890	NA	XM_003084751|XM_003084752|XM_003086670|XM_003086671|XP_003084799|XP_003084800|XP_003086718|XP_003086719
Mipol1	mirror-image polydactyly gene 1 homolog (human)	1.30415	0.0147995	73490_at	73490	ENSMUSG00000047022	NM_001164370|NP_001157842
Cdkn3	cyclin-dependent kinase inhibitor 3	1.30462	0.00759008	72391_at	72391	ENSMUSG00000037628	NM_028222|NP_082498
Prr11	proline rich 11	1.30496	0.0209047	270906_at	270906	ENSMUSG00000020493	NM_175563|NP_780772
Znrd1as	ZNRD1 antisense RNA	1.3052	0.00184562	76416_at	76416	ENSMUSG00000036214	NM_029602|NP_083878
Tpcn1	two pore channel 1	1.30584	0.0110355	252972_at	252972	ENSMUSG00000032741	NM_145853|NP_665852
Foxq1	forkhead box Q1	1.30597	0.0403463	15220_at	15220	ENSMUSG00000038415	NM_008239|NP_032265
Scand1	SCAN domain-containing 1	1.30604	0.0134724	19018_at	19018	ENSMUSG00000046229	NM_020255|NP_064651
Cntn3	contactin 3	1.30617	0.00981016	18488_at	18488	ENSMUSG00000030075	NM_008779|NP_032805
Itga2b	integrin alpha 2b	1.30624	0.00235979	16399_at	16399	ENSMUSG00000034664	NM_010575|NP_034705
Fahd1	fumarylacetoacetate hydrolase domain containing 1	1.30667	0.015319	68636_at	68636	ENSMUSG00000045316	NM_023480|NP_075969
Dhodh	dihydroorotate dehydrogenase	1.30673	0.028326	56749_at	56749	ENSMUSG00000031730	NM_020046|NP_064430
Flad1	RFad1, flavin adenine dinucleotide synthetase, homolog (yeast)	1.30713	0.0137073	319945_at	319945	ENSMUSG00000042642	NM_177041|NP_796015
Gpr89	G protein-coupled receptor 89	1.30728	0.00255488	67549_at	67549	ENSMUSG00000028096	NM_026229|NP_080505
Pla2g12a	phospholipase A2, group XIIA	1.30747	0.00488388	66350_at	66350	ENSMUSG00000027999	NM_023196|NM_183423|NP_075685|NP_904359
Serpina3g	serine (or cysteine) peptidase inhibitor, clade A, member 3G	1.30776	0.00864764	20715_at	20715	ENSMUSG00000041481	NM_009251|NP_033277
Acy3	aspartoacylase (aminoacylase) 3	1.30777	0.0464605	71670_at	71670	ENSMUSG00000024866	NM_027857|NP_082133
Hspbap1	Hspb associated protein 1	1.30785	0.0383597	66667_at	66667	ENSMUSG00000022849	NM_175111|NP_780320
Lsg1	large subunit GTPase 1 homolog (S. cerevisiae)	1.30823	0.0461037	224092_at	224092	ENSMUSG00000022538	NM_178069|NP_835170
Nudt1	nudix (nucleoside diphosphate linked moiety X)-type motif 1	1.30868	0.010641	17766_at	17766	ENSMUSG00000036639	NM_008637|NP_032663
Susd1	sushi domain containing 1	1.30943	0.0345814	634731_at	634731	ENSMUSG00000038578	NM_001163288|NP_001156760
Arsg	arylsulfatase G	1.30955	0.0035432	74008_at	74008	ENSMUSG00000020604	NM_001166177|NM_028710|NP_001159649|NP_082986
Vmn1r29	vomeronasal 1 receptor 29	1.30991	0.0332781	113859_at	113859	ENSMUSG00000091734	NM_053232|NP_444462
Mpp1	membrane protein, palmitoylated	1.30999	0.00788473	17524_at	17524	ENSMUSG00000031402	NM_008621|NP_032647
Nt5m	5',3'-nucleotidase, mitochondrial	1.31002	0.00429642	103850_at	103850	ENSMUSG00000032615	NM_134029|NP_598790
P4ha2	procollagen-proline, 2-oxoglutarate 4-dioxygenase (proline 4-hydroxylase), alpha II polypeptide	1.31027	0.0182219	18452_at	18452	ENSMUSG00000018906	NM_001136076|NM_011031|NP_001129548|NP_035161
5430407P10Rik	RIKEN cDNA 5430407P10 gene	1.31028	0.0197448	227545_at	227545	ENSMUSG00000045319	NM_001159657|NM_144883|NP_001153129|NP_659132
Prodh2	proline dehydrogenase (oxidase) 2	1.31049	0.00751041	56189_at	56189	ENSMUSG00000036892	NM_019546|NP_062419
Ece2	endothelin converting enzyme 2	1.31177	0.0360301	107522_at	107522	ENSMUSG00000022842	NM_025462|NM_139293|NM_177940|NM_177941|NM_177942|NP_079738|NP_647454|NP_808809|NP_808810|NP_808811
Slc17a2	solute carrier family 17 (sodium phosphate), member 2	1.31261	0.0476015	218103_at	218103	ENSMUSG00000036110	NM_144836|NP_659085
Gps2	G protein pathway suppressor 2	1.31269	0.0286311	56310_at	56310	ENSMUSG00000023170	NM_019726|NP_062700
Irs2	insulin receptor substrate 2	1.31344	0.0058383	384783_at	384783	ENSMUSG00000038894	NM_001081212|NP_001074681
Mfsd10	major facilitator superfamily domain containing 10	1.31444	0.0070166	68294_at	68294	ENSMUSG00000001082	NM_026660|NP_080936
Cdk5rap3	CDK5 regulatory subunit associated protein 3	1.31476	0.0273927	80280_at	80280	ENSMUSG00000018669	NM_030248|NP_084524
6030446N20Rik	RIKEN cDNA 6030446N20 gene	1.3148	0.00518295	338363_at	338363	ENSMUSG00000049411	NM_178801|NP_848916
Ubxn6	UBX domain protein 6	1.31514	0.0271885	66530_at	66530	ENSMUSG00000019578	NM_024432|NP_077752
Gnmt	glycine N-methyltransferase	1.31608	0.0214027	14711_at	14711	ENSMUSG00000002769	NM_010321|NP_034451
Pigs	phosphatidylinositol glycan anchor biosynthesis, class S	1.31705	0.00910784	276846_at	276846	ENSMUSG00000041958	NM_201406|NP_958808
Alkbh6	alkB, alkylation repair homolog 6 (E. coli)	1.31859	0.0493952	233065_at	233065	ENSMUSG00000042831	NM_198027|NP_932144
Treml1	triggering receptor expressed on myeloid cells-like 1	1.3212	0.00250679	71326_at	71326	ENSMUSG00000023993	NM_027763|NP_082039
Slc43a2	solute carrier family 43, member 2	1.32132	0.0157774	215113_at	215113	ENSMUSG00000038178	NM_001199283|NM_001199284|NM_173388|NP_001186212|NP_001186213|NP_775564
Slc37a4	solute carrier family 37 (glucose-6-phosphate transporter), member 4	1.32136	0.0146686	14385_at	14385	ENSMUSG00000032114	NM_008063|NP_032089
Aspdh	aspartate dehydrogenase domain containing	1.32213	0.00639749	68352_at	68352	ENSMUSG00000038704	NM_026690|NP_080966
Anks4b	ankyrin repeat and sterile alpha motif domain containing 4B	1.32351	0.0268973	72074_at	72074	ENSMUSG00000030909	NM_028085|NP_082361
Atg14	VATG14 autophagy related 14 homolog (S. cerevisiae)	1.32364	0.00465368	100504663_at	100504663	ENSMUSG00000037526	NM_172599|NP_766187|XM_003085045|XM_003085046|XM_003085047|XM_003085048|XM_003085919|XM_003085920|XM_003085921|XP_003085093|XP_003085094|XP_003085095|XP_003085096|XP_003085967|XP_003085968|XP_003085969
Pcolce2	procollagen C-endopeptidase enhancer 2	1.32474	0.0153109	76477_at	76477	ENSMUSG00000015354	NM_029620|NP_083896
Gm2a	GM2 ganglioside activator protein	1.32525	0.0218629	14667_at	14667	ENSMUSG00000000594	NM_010299|NP_034429
Hrnr	hornerin	1.3254	0.0351803	68723_at	68723	ENSMUSG00000041991	NM_133698|NP_598459
Polr3h	polymerase (RNA) III (DNA directed) polypeptide H	1.32596	0.00473362	78929_at	78929	ENSMUSG00000022476	NM_030229|NP_084505
F7	coagulation factor VII	1.32757	0.0153304	14068_at	14068	ENSMUSG00000031443	NM_010172|NP_034302
Runx3	runt related transcription factor 3	1.32873	0.00164862	12399_at	12399	ENSMUSG00000070691	NM_019732|NP_062706
Fam20a	family with sequence similarity 20, member A	1.32884	0.010428	208659_at	208659	ENSMUSG00000020614	NM_153782|NP_722477
Cpn2	carboxypeptidase N, polypeptide 2	1.329	0.0184338	71756_at	71756	ENSMUSG00000023176	NM_027904|NP_082180
1600021P15Rik	RIKEN cDNA 1600021P15 gene	1.32944	0.0126823	239796_at	239796	ENSMUSG00000051065	NM_177718|NP_808386
Fcgr2b	Fc receptor, IgG, low affinity IIb	1.32968	0.0013321	14130_at	14130	ENSMUSG00000026656	NM_001077189|NM_010187|NP_001070657|NP_034317
Agphd1	aminoglycoside phosphotransferase domain containing 1	1.33	0.000369217	235386_at	235386	ENSMUSG00000035878	NM_177351|NP_796325
Atg9b	ATG9 autophagy related 9 homolog B (S. cerevisiae)	1.33156	0.0071705	213948_at	213948	ENSMUSG00000038295	NM_001002897|NP_001002897
Micall2	MICAL-like 2	1.33236	0.00641363	231830_at	231830	ENSMUSG00000036718	NM_174850|NP_777275
Slc39a4	solute carrier family 39 (zinc transporter), member 4	1.33402	0.0168835	72027_at	72027	ENSMUSG00000063354	NM_028064|NP_082340
Hand2	heart and neural crest derivatives expressed transcript 2	1.33434	0.0258269	15111_at	15111	ENSMUSG00000038193	NM_010402|NP_034532
Nenf	neuron derived neurotrophic factor	1.33554	0.0377827	66208_at	66208	ENSMUSG00000037499	NM_025424|NP_079700
Pou2af1	POU domain, class 2, associating factor 1	1.33597	0.0184604	18985_at	18985	ENSMUSG00000032053	NM_011136|NP_035266
LOC100504422	hypothetical protein LOC100504422	1.33707	0.0262044	100504422_at	100504422	ENSMUSG00000073853	XM_003084730|XM_003086637|XP_003084778|XP_003086685
Tomm40	translocase of outer mitochondrial membrane 40 homolog (yeast)	1.33836	0.020956	53333_at	53333	ENSMUSG00000002984	NM_001109748|NM_016871|NP_001103218|NP_058567
2810453I06Rik	RIKEN cDNA 2810453I06 gene	1.33888	0.0355974	67238_at	67238	ENSMUSG00000048910	NM_026050|NM_133703|NP_080326|NP_598464
Tmem179b	transmembrane protein 179B	1.33913	0.00675766	67706_at	67706	ENSMUSG00000079437	NM_026325|NP_080601|NR_028418|NR_028419
Thoc3	THO complex 3	1.33992	0.0097071	73666_at	73666	ENSMUSG00000025872	NM_028597|NP_082873
Prpf6	PRP6 pre-mRNA splicing factor 6 homolog (yeast)	1.34016	0.0210132	68879_at	68879	ENSMUSG00000002455	NM_133701|NP_598462
Gstm6	glutathione S-transferase, mu 6	1.34174	0.00293516	14867_at	14867	ENSMUSG00000068762	NM_008184|NP_032210
Bex6	brain expressed gene 6	1.3423	0.00833393	328660_at	328660	ENSMUSG00000075269	NM_001033539|NP_001028711
A230050P20Rik	RIKEN cDNA A230050P20 gene	1.34341	0.0251262	319278_at	319278	ENSMUSG00000038884	NM_175687|NP_783618
Retsat	retinol saturase (all trans retinol 13,14 reductase)	1.34342	0.00499811	67442_at	67442	ENSMUSG00000056666	NM_026159|NP_080435
Spryd4	SPRY domain containing 4	1.34458	0.00222403	66701_at	66701	ENSMUSG00000051346	NM_025716|NP_079992
Gmeb2	glucocorticoid modulatory element binding protein 2	1.34858	0.00799271	229004_at	229004	ENSMUSG00000038705	NM_198169|NP_937812
3110082I17Rik	RIKEN cDNA 3110082I17 gene	1.34884	0.000363116	73212_at	73212	ENSMUSG00000053553	NM_028469|NP_082745
Stap2	signal transducing adaptor family member 2	1.34977	0.0114849	106766_at	106766	ENSMUSG00000038781	NM_145934|NP_666046
Azi1	5-azacytidine induced gene 1	1.35009	0.021852	12009_at	12009	ENSMUSG00000039781	NM_009734|NP_033864
Nudt18	nudix (nucleoside diphosphate linked moiety X)-type motif 18	1.35015	0.0237503	213484_at	213484	ENSMUSG00000045211	NM_153136|NP_694776
C8b	complement component 8, beta polypeptide	1.35049	0.0150055	110382_at	110382	ENSMUSG00000029656	NM_133882|NP_598643
Ccdc18	coiled-coil domain containing 18	1.35053	0.0298502	73254_at	73254	ENSMUSG00000056531	NM_028481|NP_082757
Orc1	origin recognition complex, subunit 1	1.35143	0.0251598	18392_at	18392	ENSMUSG00000028587	NM_011015|NP_035145
Slc14a1	solute carrier family 14 (urea transporter), member 1	1.35158	0.0252392	108052_at	108052	ENSMUSG00000059336	NM_001171010|NM_001171011|NM_028122|NP_001164481|NP_001164482|NP_082398
Ikbkg	inhibitor of kappaB kinase gamma	1.35242	0.01076	16151_at	16151	ENSMUSG00000004221	NM_001136067|NM_001161421|NM_001161422|NM_001161423|NM_001161424|NM_010547|NM_178590|NP_001129539|NP_001154893|NP_001154894|NP_001154895|NP_001154896|NP_034677|NP_848705
Echdc2	enoyl Coenzyme A hydratase domain containing 2	1.3553	0.0136598	52430_at	52430	ENSMUSG00000028601	NM_026728|NP_081004
9530008L14Rik	RIKEN cDNA 9530008L14 gene	1.35598	0.0408394	109254_at	109254	ENSMUSG00000058022	NM_001145875|NM_175417|NP_001139347|NP_780626
Dcps	decapping enzyme, scavenger	1.35795	0.0481422	69305_at	69305	ENSMUSG00000032040	NM_027030|NP_081306
Gfi1b	growth factor independent 1B	1.35796	0.0121566	14582_at	14582	ENSMUSG00000026815	NM_001160406|NM_008114|NP_001153878|NP_032140
Tbc1d10b	TBC1 domain family, member 10b	1.35818	0.00751121	68449_at	68449	ENSMUSG00000042492	NM_144522|NP_653105
Itpka	inositol 1,4,5-trisphosphate 3-kinase A	1.3591	0.0119249	228550_at	228550	ENSMUSG00000027296	NM_146125|NP_666237
Tysnd1	trypsin domain containing 1	1.35913	0.0281398	71767_at	71767	ENSMUSG00000020087	NM_027912|NP_082188
Zfp771	zinc finger protein 771	1.36035	0.0378037	244216_at	244216	ENSMUSG00000054716	NM_177362|NP_796336
Hbq1a	hemoglobin, theta 1A	1.36045	0.0133709	216635_at	216635	ENSMUSG00000020295	NM_175000|NP_778165
Slc25a47	solute carrier family 25, member 47	1.36146	0.0243401	104910_at	104910	ENSMUSG00000048856	NM_001012310|NP_001012310
Slc35a4	solute carrier family 35, member A4	1.36188	0.0264551	67843_at	67843	ENSMUSG00000033272	NM_001083317|NM_026404|NP_001076786|NP_080680
Slc22a18	solute carrier family 22 (organic cation transporter), member 18	1.36239	0.0295439	18400_at	18400	ENSMUSG00000000154	NM_001042760|NM_008767|NP_001036225|NP_032793
Dusp28	dual specificity phosphatase 28	1.36353	0.0125463	67446_at	67446	ENSMUSG00000047067	NM_175118|NP_780327
Peo1	progressive external ophthalmoplegia 1 (human)	1.36444	0.00344808	226153_at	226153	ENSMUSG00000025209	NM_153796|NP_722491
Polr3c	polymerase (RNA) III (DNA directed) polypeptide C	1.36514	0.0067901	74414_at	74414	ENSMUSG00000028099	NM_028925|NP_083201
1810014F10Rik	RIKEN cDNA 1810014F10 gene	1.3652	0.0069194	69064_at	69064	ENSMUSG00000025466	NM_026928|NP_081204
Slc39a5	solute carrier family 39 (metal ion transporter), member 5	1.36531	0.0493263	72002_at	72002	ENSMUSG00000039878	NM_001136237|NM_028051|NM_028092|NP_001129709|NP_082327|NP_082368
Abhd5	abhydrolase domain containing 5	1.36565	0.035434	67469_at	67469	ENSMUSG00000032540	NM_026179|NP_080455
Pdzk1	PDZ domain containing 1	1.36609	0.00856506	59020_at	59020	ENSMUSG00000038298	NM_001146001|NM_021517|NP_001139473|NP_067492
Crp	C-reactive protein, pentraxin-related	1.36652	0.0250964	12944_at	12944	ENSMUSG00000037942	NM_007768|NP_031794
Acer2	alkaline ceramidase 2	1.36655	0.0017175	230379_at	230379	ENSMUSG00000038007	NM_139306|NP_647467
MARCH2	membrane-associated ring finger (C3HC4) 2	1.36751	0.0494554	224703_at	224703	ENSMUSG00000079557	NM_145486|NP_663461
F9	coagulation factor IX	1.36902	0.024198	14071_at	14071	ENSMUSG00000031138	NM_007979|NP_032005
Fcnb	ficolin B	1.36941	0.0264995	14134_at	14134	ENSMUSG00000026835	NM_010190|NP_034320
Rdh7	retinol dehydrogenase 7	1.36984	0.0273683	54150_at	54150	ENSMUSG00000040134	NM_001150749|NM_017473|NP_001144221|NP_059501
Mcart1	mitochondrial carrier triple repeat 1	1.37029	0.00794369	230125_at	230125	ENSMUSG00000045973	NM_001009949|NP_001009949
Gjb1	gap junction protein, beta 1	1.37065	0.00749769	14618_at	14618	ENSMUSG00000047797	NM_008124|NP_032150
1500010J02Rik	RIKEN cDNA 1500010J02 gene	1.3712	0.0127371	68964_at	68964	ENSMUSG00000020898	NM_001013256|NM_001143790|NP_001013274|NP_001137262|NR_026565
2210411K11Rik	RIKEN cDNA 2210411K11 gene	1.37289	0.0249194	664968_at	664968	ENSMUSG00000030431	NM_029384|NP_083660
Bcs1l	BCS1-like (yeast)	1.37309	0.00694398	66821_at	66821	ENSMUSG00000026172	NM_025784|NP_080060
Tmem186	transmembrane protein 186	1.37348	0.018971	66690_at	66690	ENSMUSG00000043140	NM_025708|NP_079984
Adpgk	ADP-dependent glucokinase	1.37572	0.0168732	72141_at	72141	ENSMUSG00000025236	NM_028121|NP_082397
Aqp1	aquaporin 1	1.3758	0.0025322	11826_at	11826	ENSMUSG00000004655	NM_007472|NP_031498
Slco2a1	solute carrier organic anion transporter family, member 2a1	1.37588	0.019854	24059_at	24059	ENSMUSG00000032548	NM_033314|NP_201571
Polr1b	polymerase (RNA) I polypeptide B	1.37645	0.0124553	20017_at	20017	ENSMUSG00000027395	NM_009086|NP_033112
Rhobtb3	Rho-related BTB domain containing 3	1.37889	0.00805779	73296_at	73296	ENSMUSG00000021589	NM_028493|NP_082769
Tgm1	transglutaminase 1, K polypeptide	1.38031	0.0244268	21816_at	21816	ENSMUSG00000022218	NM_001161714|NM_001161715|NM_019984|NP_001155186|NP_001155187|NP_064368
Nags	N-acetylglutamate synthase	1.38196	0.00128075	217214_at	217214	ENSMUSG00000048217	NM_145829|NM_178053|NP_665828|NP_835154
Naga	N-acetyl galactosaminidase, alpha	1.382	0.000270267	17939_at	17939	ENSMUSG00000022453	NM_008669|NP_032695
Was	Wiskott-Aldrich syndrome homolog (human)	1.38229	0.00262901	22376_at	22376	ENSMUSG00000031165	NM_009515|NP_033541
Haao	3-hydroxyanthranilate 3,4-dioxygenase	1.38233	0.0204472	107766_at	107766	ENSMUSG00000000673	NM_025325|NP_079601
D17Wsu104e	DNA segment, Chr 17, Wayne State University 104, expressed	1.38585	0.010381	28106_at	28106	ENSMUSG00000019579	NM_080837|NP_543027
Gpr110	G protein-coupled receptor 110	1.39009	0.0434519	77596_at	77596	ENSMUSG00000041293	NM_133776|NP_598537
Clcn2	chloride channel 2	1.39129	0.00684066	12724_at	12724	ENSMUSG00000022843	NM_009900|NP_034030
Chtf8	CTF8, chromosome transmission fidelity factor 8 homolog (S. cerevisiae)	1.39211	0.00995038	214987_at	214987	ENSMUSG00000046691	NM_145412|NP_663387
Apcs	serum amyloid P-component	1.39238	0.0294096	20219_at	20219	ENSMUSG00000026542	NM_011318|NP_035448
Fam132a	family with sequence similarity 132, member A	1.39264	0.0132871	67389_at	67389	ENSMUSG00000023571	NM_026125|NP_080401
1300018J18Rik	RIKEN cDNA 1300018J18 gene	1.39295	0.00411457	223776_at	223776	ENSMUSG00000035757	NM_027905|NP_082181
Nme6	non-metastatic cells 6, protein expressed in (nucleoside-diphosphate kinase)	1.39308	0.0129468	54369_at	54369	ENSMUSG00000032478	NM_018757|NP_061227
Pctp	phosphatidylcholine transfer protein	1.3947	0.00762611	18559_at	18559	ENSMUSG00000020553	NM_008796|NP_032822
Alx3	aristaless-like homeobox 3	1.39491	0.040377	11694_at	11694	ENSMUSG00000014603	NM_007441|NP_031467
Tuft1	tuftelin 1	1.39659	0.0260434	22156_at	22156	ENSMUSG00000005968	NM_011656|NP_035786
Slc1a4	solute carrier family 1 (glutamate/neutral amino acid transporter), member 4	1.39788	0.0362952	55963_at	55963	ENSMUSG00000020142	NM_018861|NP_061349
Gjb2	gap junction protein, beta 2	1.3979	0.00110878	14619_at	14619	ENSMUSG00000046352	NM_008125|NP_032151
Gstt3	glutathione S-transferase, theta 3	1.39888	0.0189336	103140_at	103140	ENSMUSG00000001665	NM_133994|NP_598755
Zfp738	zinc finger protein 738	1.40077	0.00417058	408068_at	408068	ENSMUSG00000048280	NM_001001187|NP_001001187
Slc41a3	solute carrier family 41, member 3	1.40219	0.00979059	71699_at	71699	ENSMUSG00000030089	NM_001037493|NM_027868|NP_001032570|NP_082144
Mobkl2a	MOB1, Mps One Binder kinase activator-like 2A (yeast)	1.40394	0.00334408	208228_at	208228	ENSMUSG00000003348	NM_172457|NP_766045
Elp2	elongation protein 2 homolog (S. cerevisiae)	1.40498	0.0303701	58523_at	58523	ENSMUSG00000024271	NM_021448|NP_067423
Cd68	CD68 antigen	1.40516	0.00551214	12514_at	12514	ENSMUSG00000018774	NM_009853|NP_033983
Cyp3a25	cytochrome P450, family 3, subfamily a, polypeptide 25	1.4078	0.00783859	56388_at	56388	ENSMUSG00000029630	NM_019792|NP_062766|NR_030782
2610024G14Rik	RIKEN cDNA 2610024G14 gene	1.40883	0.0125298	56412_at	56412	ENSMUSG00000036285	NM_019836|NP_062810
Slc44a3	solute carrier family 44, member 3	1.40884	0.0160333	213603_at	213603	ENSMUSG00000039865	NM_145394|NP_663369
Cyp4f15	cytochrome P450, family 4, subfamily f, polypeptide 15	1.41037	0.000241919	106648_at	106648	ENSMUSG00000073424	NM_134127|NP_598888
Qsox1	quiescin Q6 sulfhydryl oxidase 1	1.41261	0.0394329	104009_at	104009	ENSMUSG00000033684	NM_001024945|NM_023268|NP_001020116|NP_075757
Maff	v-maf musculoaponeurotic fibrosarcoma oncogene family, protein F (avian)	1.41483	0.0457791	17133_at	17133	ENSMUSG00000042622	NM_010755|NP_034885
Apon	apolipoprotein N	1.41741	0.0191106	28194_at	28194	ENSMUSG00000051716	NM_133996|NP_598757
Fars2	phenylalanine-tRNA synthetase 2 (mitochondrial)	1.41843	0.00184919	69955_at	69955	ENSMUSG00000021420	NM_001039189|NM_024274|NP_001034278|NP_077236
Uba7	ubiquitin-like modifier activating enzyme 7	1.41895	0.00382836	74153_at	74153	ENSMUSG00000032596	NM_023738|NP_076227
Akt2	thymoma viral proto-oncogene 2	1.41943	0.0195278	11652_at	11652	ENSMUSG00000004056	NM_001110208|NM_007434|NP_001103678|NP_031460
Fbxo6	F-box protein 6	1.41992	0.0285661	50762_at	50762	ENSMUSG00000055401	NM_001163704|NM_001163705|NM_001163706|NM_001163707|NM_015797|NP_001157176|NP_001157177|NP_001157178|NP_001157179|NP_056612
Btd	biotinidase	1.42014	0.0177395	26363_at	26363	ENSMUSG00000021900	NM_025295|NP_079571
Rab4a	RAB4A, member RAS oncogene family	1.42119	0.0369766	19341_at	19341	ENSMUSG00000019478	NM_009003|NP_033029
Echdc3	enoyl Coenzyme A hydratase domain containing 3	1.42131	0.037248	67856_at	67856	ENSMUSG00000039063	NM_024208|NP_077170
Tgfb1	transforming growth factor, beta 1	1.42495	0.00925929	21803_at	21803	ENSMUSG00000002603	NM_011577|NP_035707
Mepce	methylphosphate capping enzyme	1.4254	0.00510689	231803_at	231803	ENSMUSG00000029726	NM_144913|NP_659162
Egln3	EGL nine homolog 3 (C. elegans)	1.42589	0.0382808	112407_at	112407	ENSMUSG00000035105	NM_028133|NP_082409
Epha1	Eph receptor A1	1.42851	0.00509063	13835_at	13835	ENSMUSG00000029859	NM_023580|NP_076069
Map4k1	mitogen-activated protein kinase kinase kinase kinase 1	1.42872	0.000134669	26411_at	26411	ENSMUSG00000037337	NM_008279|NP_032305
Mthfd2l	methylenetetrahydrofolate dehydrogenase (NADP+ dependent) 2-like	1.42885	0.00270619	665563_at	665563	ENSMUSG00000029376	NM_026788|NP_081064
Tmem219	transmembrane protein 219	1.43453	0.00428338	68742_at	68742	ENSMUSG00000060538	NM_026827|NM_028389|NP_081103|NP_082665
H6pd	hexose-6-phosphate dehydrogenase (glucose 1-dehydrogenase)	1.43552	0.00995381	100198_at	100198	ENSMUSG00000028980	NM_173371|NP_775547
Hfe2	hemochromatosis type 2 (juvenile) (human homolog)	1.43762	0.00888469	69585_at	69585	ENSMUSG00000038403	NM_027126|NP_081402
Scd1	stearoyl-Coenzyme A desaturase 1	1.43818	0.0275598	20249_at	20249	ENSMUSG00000037071	NM_009127|NP_033153
Nlrx1	NLR family member X1	1.43869	0.0210737	270151_at	270151	ENSMUSG00000032109	NM_001163742|NM_001163743|NM_178420|NP_001157214|NP_001157215|NP_848507
Lgals3bp	lectin, galactoside-binding, soluble, 3 binding protein	1.43966	0.0112533	19039_at	19039	ENSMUSG00000033880	NM_011150|NP_035280
Pml	promyelocytic leukemia	1.44177	0.00663313	18854_at	18854	ENSMUSG00000036986	NM_008884|NM_178087|NP_032910|NP_835188
Tcf20	transcription factor 20	1.44475	0.00879391	21411_at	21411	ENSMUSG00000041852	NM_001114140|NM_013836|NP_001107612|NP_038864
Il1rap	interleukin 1 receptor accessory protein	1.4463	0.00510035	16180_at	16180	ENSMUSG00000022514	NM_001159317|NM_001159318|NM_008364|NM_134103|NP_001152789|NP_001152790|NP_032390|NP_598864
H2-DMa	histocompatibility 2, class II, locus DMa	1.4478	0.0239405	14998_at	14998	ENSMUSG00000037649	NM_010386|NP_034516
Myof	myoferlin	1.44901	0.0410556	226101_at	226101	ENSMUSG00000048612	NM_001099634|NP_001093104
BC003266	cDNA sequence BC003266	1.4504	0.00184682	80284_at	80284	ENSMUSG00000042380	NM_030252|NP_084528
Rbp2	retinol binding protein 2, cellular	1.45043	0.0355055	19660_at	19660	ENSMUSG00000032454	NM_009034|NP_033060
Vars	valyl-tRNA synthetase	1.45213	0.000143049	22321_at	22321	ENSMUSG00000007029	NM_011690|NP_035820
Fam53b	family with sequence similarity 53, member B	1.45422	0.012526	77938_at	77938	ENSMUSG00000030956	NM_175268|NM_212473|NP_780477|NP_997638
Pcca	propionyl-Coenzyme A carboxylase, alpha polypeptide	1.45491	0.00672482	110821_at	110821	ENSMUSG00000041650	NM_144844|NP_659093
1810063B07Rik	RIKEN cDNA 1810063B07 gene	1.45666	0.00880885	67509_at	67509	ENSMUSG00000045107	NM_026209|NP_080485
Ethe1	ethylmalonic encephalopathy 1	1.45813	0.00376607	66071_at	66071	ENSMUSG00000064254	NM_023154|NP_075643
Khk	ketohexokinase	1.4589	0.0136011	16548_at	16548	ENSMUSG00000029162	NM_008439|NP_032465
A830035A12Rik	RIKEN cDNA A830035A12 gene	1.4636	0.0245983	442842_at	442842	NA	XM_920516|XM_986896|XP_925609|XP_991990
Ctnnbl1	catenin, beta like 1	1.46836	0.0147445	66642_at	66642	ENSMUSG00000027649	NM_025680|NP_079956
Acsf3	acyl-CoA synthetase family member 3	1.47074	0.00283552	257633_at	257633	ENSMUSG00000015016	NM_144932|NP_659181
Abca8b	ATP-binding cassette, sub-family A (ABC1), member 8b	1.47078	0.0136104	27404_at	27404	ENSMUSG00000020620	NM_013851|NP_038879
Tmem86b	transmembrane protein 86B	1.47181	0.0024722	68255_at	68255	ENSMUSG00000045282	NM_023440|NP_075929
Cyp2c70	cytochrome P450, family 2, subfamily c, polypeptide 70	1.47223	0.0385715	226105_at	226105	ENSMUSG00000060613	NM_145499|NP_663474
Slc15a3	solute carrier family 15, member 3	1.47523	0.00820431	65221_at	65221	ENSMUSG00000024737	NM_023044|NP_075531
Smoc1	SPARC related modular calcium binding 1	1.47699	0.0127501	64075_at	64075	ENSMUSG00000021136	NM_001146217|NM_022316|NP_001139689|NP_071711
Ddx56	DEAD (Asp-Glu-Ala-Asp) box polypeptide 56	1.47848	0.0112075	52513_at	52513	ENSMUSG00000004393	NM_026538|NP_080814
Bhlhe40	basic helix-loop-helix family, member e40	1.47917	0.00708858	20893_at	20893	ENSMUSG00000030103	NM_011498|NP_035628
Slpi	secretory leukocyte peptidase inhibitor	1.488	0.000910726	20568_at	20568	ENSMUSG00000017002	NM_011414|NP_035544
Rasd2	RASD family, member 2	1.48933	5.2327e-05	75141_at	75141	ENSMUSG00000034472	NM_029182|NP_083458
Ddb2	damage specific DNA binding protein 2	1.49252	0.00337544	107986_at	107986	ENSMUSG00000002109	NM_028119|NP_082395
Ppp1r3g	protein phosphatase 1, regulatory (inhibitor) subunit 3G	1.49569	0.00283277	76487_at	76487	ENSMUSG00000050423	NM_029628|NP_083904
Agxt2l1	alanine-glyoxylate aminotransferase 2-like 1	1.50128	0.000928059	71760_at	71760	ENSMUSG00000019232	NM_001163587|NM_027907|NP_001157059|NP_082183
Slc27a5	solute carrier family 27 (fatty acid transporter), member 5	1.50695	0.00344219	26459_at	26459	ENSMUSG00000030382	NM_009512|NP_033538
Prlr	prolactin receptor	1.50758	0.00635445	19116_at	19116	ENSMUSG00000005268	NM_011169|NP_035299
Selplg	selectin, platelet (p-selectin) ligand	1.50981	0.0108239	20345_at	20345	ENSMUSG00000048163	NM_009151|NP_033177
Fam167b	family with sequence similarity 167, member B	1.51401	1.22535e-05	230766_at	230766	ENSMUSG00000050493	NM_182783|NP_877584
Psmd9	proteasome (prosome, macropain) 26S subunit, non-ATPase, 9	1.51572	0.00129523	67151_at	67151	ENSMUSG00000029440	NM_026000|NP_080276
Fmo1	flavin containing monooxygenase 1	1.51826	0.0233019	14261_at	14261	ENSMUSG00000040181	NM_010231|NP_034361
Ces1e	carboxylesterase 1E	1.51938	0.00068784	13897_at	13897	ENSMUSG00000061959	NM_133660|NP_598421
Prrg2	proline-rich Gla (G-carboxyglutamic acid) polypeptide 2	1.52042	0.00112752	65116_at	65116	ENSMUSG00000007837	NM_022999|NP_075375
Pus7	pseudouridylate synthase 7 homolog (S. cerevisiae)	1.52147	0.019608	78697_at	78697	ENSMUSG00000057541	NM_178403|NP_848490
Entpd2	ectonucleoside triphosphate diphosphohydrolase 2	1.52651	0.0130301	12496_at	12496	ENSMUSG00000015085	NM_009849|NP_033979
Keg1	kidney expressed gene 1	1.52906	0.0213361	64697_at	64697	ENSMUSG00000024694	NM_029550|NP_083826
Cyp2d9	cytochrome P450, family 2, subfamily d, polypeptide 9	1.53204	0.0217201	13105_at	13105	ENSMUSG00000068086	NM_010006|NP_034136
Plin5	perilipin 5	1.54596	0.00458446	66968_at	66968	ENSMUSG00000011305	NM_001077348|NM_025874|NP_001070816|NP_080150
Rsad2	radical S-adenosyl methionine domain containing 2	1.54667	0.00344446	58185_at	58185	ENSMUSG00000020641	NM_021384|NP_067359
Ccs	copper chaperone for superoxide dismutase	1.54826	0.000500509	12460_at	12460	ENSMUSG00000034108	NM_016892|NP_058588
Aox3	aldehyde oxidase 3	1.56002	0.0183158	71724_at	71724	ENSMUSG00000064294	NM_023617|NP_076106
AI467606	expressed sequence AI467606	1.574	0.000983172	101602_at	101602	ENSMUSG00000045165	NM_178901|NP_849232
Csta	cystatin A	1.57777	0.0390013	209294_at	209294	ENSMUSG00000034362	NM_001033239|NP_001028411
D4Bwg0951e	DNA segment, Chr 4, Brigham & Women's Genetics 0951 expressed	1.57917	0.0236042	52829_at	52829	ENSMUSG00000048706	NM_026821|NP_081097
Agxt	alanine-glyoxylate aminotransferase	1.59056	0.00199299	11611_at	11611	ENSMUSG00000026272	NM_016702|NP_057911
Saa3	serum amyloid A 3	1.59112	0.0391151	20210_at	20210	ENSMUSG00000040026	NM_011315|NP_035445
Cyp3a13	cytochrome P450, family 3, subfamily a, polypeptide 13	1.59117	0.0353505	13113_at	13113	ENSMUSG00000029727	NM_007819|NP_031845
Hist1h4i	histone cluster 1, H4i	1.59228	0.0197574	319158_at	319158	ENSMUSG00000060639	NM_175656|NP_783587
Dnajb11	DnaJ (Hsp40) homolog, subfamily B, member 11	1.59774	0.00280756	67838_at	67838	ENSMUSG00000004460	NM_001190804|NM_001190805|NM_026400|NP_001177733|NP_001177734|NP_080676
Nubpl	nucleotide binding protein-like	1.59811	0.0141996	76826_at	76826	ENSMUSG00000035142	NM_029760|NP_084036
Ifi47	interferon gamma inducible protein 47	1.60071	0.00860274	15953_at	15953	ENSMUSG00000078920	NM_008330|NP_032356
Por	P450 (cytochrome) oxidoreductase	1.60325	0.00356021	18984_at	18984	ENSMUSG00000005514	NM_008898|NP_032924
Slc13a3	solute carrier family 13 (sodium-dependent dicarboxylate transporter), member 3	1.61399	0.00269263	114644_at	114644	ENSMUSG00000018459	NM_054055|NP_473396
Pxmp4	peroxisomal membrane protein 4	1.61709	0.00106384	59038_at	59038	ENSMUSG00000000876	NM_021534|NP_067509
Arl16	ADP-ribosylation factor-like 16	1.62449	0.000903847	70317_at	70317	ENSMUSG00000057594	NM_197995|NP_932112
Bri3	brain protein I3	1.63395	0.000838797	55950_at	55950	ENSMUSG00000047843	NM_001163709|NM_018772|NP_001157181|NP_061242
Lpin1	lipin 1	1.64559	0.0203625	14245_at	14245	ENSMUSG00000020593	NM_001130412|NM_015763|NM_172950|NP_001123884|NP_056578|NP_766538
1190003J15Rik	RIKEN cDNA 1190003J15 gene	1.64998	0.00379744	76974_at	76974	ENSMUSG00000025481	NM_029821|NP_084097
Akr1b8	aldo-keto reductase family 1, member B8	1.65115	0.0112054	14187_at	14187	ENSMUSG00000029762	NM_008012|NP_032038
Hal	histidine ammonia lyase	1.65969	0.0121684	15109_at	15109	ENSMUSG00000020017	NM_010401|NP_034531
Cml1	camello-like 1	1.66648	0.00909535	66116_at	66116	ENSMUSG00000057103	NM_023160|NP_075649
Aqp9	aquaporin 9	1.67844	0.000452002	64008_at	64008	ENSMUSG00000032204	NM_022026|NP_071309
2510049J12Rik	RIKEN cDNA 2510049J12 gene	1.68559	0.0023604	70291_at	70291	ENSMUSG00000068011	NM_001101431|NP_001094901
Gkn2	gastrokine 2	1.68731	0.016261	66284_at	66284	ENSMUSG00000030049	NM_025467|NP_079743
Vnn3	vanin 3	1.69243	0.0359852	26464_at	26464	ENSMUSG00000020010	NM_011979|NP_036109
Fetub	fetuin beta	1.69713	0.0201438	59083_at	59083	ENSMUSG00000022871	NM_001083904|NM_001083905|NM_021564|NP_001077373|NP_001077374|NP_067539
Cish	cytokine inducible SH2-containing protein	1.70242	0.00126952	12700_at	12700	ENSMUSG00000032578	NM_009895|NP_034025
Fxn	frataxin	1.73923	0.00949612	14297_at	14297	ENSMUSG00000059363	NM_008044|NP_032070
Hacl1	2-hydroxyacyl-CoA lyase 1	1.74083	0.0104445	56794_at	56794	ENSMUSG00000021884	NM_019975|NP_064359
Capn10	calpain 10	1.75123	0.00024668	23830_at	23830	ENSMUSG00000026270	NM_011796|NP_035926
Gpr146	G protein-coupled receptor 146	1.75254	0.0129802	80290_at	80290	ENSMUSG00000044197	NM_001038703|NM_030258|NP_001033792|NP_084534
Lrg1	leucine-rich alpha-2-glycoprotein 1	1.8456	0.0144186	76905_at	76905	ENSMUSG00000037095	NM_029796|NP_084072
Acsm1	acyl-CoA synthetase medium-chain family member 1	1.89557	0.00710361	117147_at	117147	ENSMUSG00000033533	NM_054094|NP_473435
Hist3h2ba	histone cluster 3, H2ba	1.89892	0.00251832	78303_at	78303	ENSMUSG00000056895	NM_030082|NP_084358
Pfkfb1	6-phosphofructo-2-kinase/fructose-2,6-biphosphatase 1	1.96409	0.00701908	18639_at	18639	ENSMUSG00000025271	NM_008824|NP_032850
Nr1h4	nuclear receptor subfamily 1, group H, member 4	2.00543	0.000891349	20186_at	20186	ENSMUSG00000047638	NM_001163504|NM_001163700|NM_009108|NP_001156976|NP_001157172|NP_033134
Pemt	phosphatidylethanolamine N-methyltransferase	2.05004	0.021125	18618_at	18618	ENSMUSG00000000301	NM_008819|NP_032845
Serpine1	serine (or cysteine) peptidase inhibitor, clade E, member 1	2.10845	0.000796224	18787_at	18787	ENSMUSG00000037411	NM_008871|NP_032897
LOC100503019	hypothetical protein LOC100503019	2.49898	0.0182225	100503019_at	100503019	NA	XM_003084797|XP_003084845
Cyp2e1	cytochrome P450, family 2, subfamily e, polypeptide 1	2.66323	0.0115063	13106_at	13106	ENSMUSG00000025479	NM_021282|NP_067257
Asgr1	asialoglycoprotein receptor 1	2.80053	0.0097354	11889_at	11889	ENSMUSG00000020884	NM_009714|NP_033844
Hamp	hepcidin antimicrobial peptide	3.34075	0.000673075	84506_at	84506	ENSMUSG00000050440	NM_032541|NP_115930

## Sheet: Supplementary Table 3
Supplementatry Table 3: List of genes encoding transcription factors differentially expressed in the fetal liver in reponse to low maternal folate. Genes were considered to be significantly differentially expressed in response to low maternal folate if (a) the p value for t-test between dietary groups was < 0.05 and (b) if there was a fold change of ±1.2. B1
Gene symbol	Fold Change	P Value
AKNA	1.2695	0.0146213
ALX3	1.39491	0.040377
ATOH1	-1.21285	0.000442919
BCL11B	-1.2278	0.0133812
BHLHE40	1.47917	0.00708858
CBX6	-1.3663	0.0214314
CCND1	-1.2681	0.0155649
DACH1	-1.30938	0.0184719
DEDD2	1.21752	0.0428598
ELK3	-1.20198	0.0342526
ELP2	1.40498	0.0303701
EPC1	-1.21374	0.00362962
FBXO11	-1.67851	0.0408124
FOXP2	-1.56638	0.0369985
FOXQ1	1.30597	0.0403463
GFI1B	1.35796	0.0121566
GMEB2	1.34858	0.00799271
GTF2E1	-1.41152	0.00556255
GTF3C5	1.23354	0.00781593
HAND2	1.33434	0.0258269
HCLS1	1.29912	0.0107978
HDAC8	-1.29921	0.0157872
HES6	1.20567	0.0461211
HOXA5	-1.63382	0.0343225
IRF8	1.20157	0.0280992
IRX3	-1.81839	0.0379571
JMY	1.22231	0.0283486
LASS2	1.20301	0.0466445
MAFF	1.41483	0.0457791
MED19	-1.28423	0.0349144
MED6	-1.35858	0.00864045
MEF2C	-1.64804	0.00195736
MTERF	-1.72346	0.0293676
MYCN	-1.34158	0.00488066
MYF6	-1.42267	0.000528288
NFKB2	1.20539	0.00675743
NR1H2	1.24072	0.0480453
NR1H4	2.00543	0.000891349
NR2C1	1.21092	0.0251509
NR2F1	-1.4609	0.0435926
PBRM1	-1.22514	0.0480625
PBX1	-1.28631	0.0033898
PML	1.44177	0.00663313
POU2AF1	1.33597	0.0184604
PPARA	1.20296	0.0136051
PROX1	-1.26445	0.00838198
PRPF6	1.34016	0.0210132
RAD54L2	-1.23933	0.00274887
RFXAP	-1.24791	0.0264431
RUNX3	1.32873	0.00164862
RXRA	1.2117	0.00105713
SAP30BP	1.30238	0.00573144
SATB1	-1.2519	0.0262849
SCAND1	1.30604	0.0134724
SETD7	-1.21326	0.0146177
SETD8	1.25245	0.0469805
SIN3A	-1.21423	0.0345056
SMAD5	-1.28686	0.027026
SMAD6	1.29222	0.0336221
SMARCD3	-1.51694	0.00938401
SOX10	1.2148	0.0219458
SOX30	-1.25885	0.0137421
STAT5A	1.28769	0.00899993
TARDBP	-1.51868	0.0450803
TBX5	-1.43755	0.00589846
TCEAL1	-1.40536	0.0350913
TCF20	1.44475	0.00879391
TSC22D3	-1.28119	0.0226679
VEZF1	-1.39147	0.0322088
VGLL2	-1.25613	0.0147093
WWTR1	-1.56637	0.0279579
ZBTB33	-1.36965	0.0300295
ZFP105	-1.23064	0.0277118

## Sheet: Supplementary Table 4
Supplementatry Table 4: List of genes differentially expressed in the placenta in reponse to low maternal folate. Genes were considered to be significantly differentially expressed in response to low maternal folate if (a) the p value for t-test between dietary groups was < 0.05 and (b) if there was a fold change of ±1.2. D1
Gene Symbol	Gene Name	Fold change in reponse to low folate	P value	Affy ID	Entrez ID	Ensembl ID	RefSeq
Cyp21a1	cytochrome P450, family 21, subfamily a, polypeptide 1	-2.52213	0.00200266	13079_at	13079	ENSMUSG00000024365	NM_009995|NP_034125
Hbb-y	hemoglobin Y, beta-like embryonic chain	-2.15493	0.0344558	15135_at	15135	ENSMUSG00000052187	NM_008221|NP_032247
Slco1b2	solute carrier organic anion transporter family, member 1b2	-2.04584	0.0108053	28253_at	28253	ENSMUSG00000030236	NM_020495|NP_065241
Rbp2	retinol binding protein 2, cellular	-1.86211	0.00104495	19660_at	19660	ENSMUSG00000032454	NM_009034|NP_033060
Nnat	neuronatin	-1.85495	0.0385235	18111_at	18111	ENSMUSG00000067786	NM_010923|NM_180960|NP_035053|NP_851291
Mettl7b	methyltransferase like 7B	-1.82964	0.00354166	71664_at	71664	ENSMUSG00000025347	NM_027853|NP_082129
Aldob	aldolase B, fructose-bisphosphate	-1.81206	0.00313442	230163_at	230163	ENSMUSG00000028307	NM_144903|NP_659152
Lamb3	laminin, beta 3	-1.71489	0.000762889	16780_at	16780	ENSMUSG00000026639	NM_008484|NP_032510
C3	complement component 3	-1.70438	0.0184485	12266_at	12266	ENSMUSG00000024164	NM_009778|NP_033908
Selenbp1	selenium binding protein 1	-1.70067	0.00277019	20341_at	20341	ENSMUSG00000068874	NM_009150|NP_033176
Mosc1	MOCO sulphurase C-terminal domain containing 1	-1.59519	0.0125727	66112_at	66112	ENSMUSG00000026621	NM_001081361|NP_001074830
Hba-x	hemoglobin X, alpha-like embryonic chain in Hba complex	-1.58521	0.0406542	15126_at	15126	ENSMUSG00000055609	NM_010405|NP_034535
Myo1c	myosin IC	-1.58479	0.00242168	17913_at	17913	ENSMUSG00000017774	NM_001080774|NM_001080775|NM_008659|NP_001074243|NP_001074244|NP_032685
Siglec1	sialic acid binding Ig-like lectin 1, sialoadhesin	-1.56541	0.0140553	20612_at	20612	ENSMUSG00000027322	NM_011426|NP_035556
Dhcr7	7-dehydrocholesterol reductase	-1.55146	0.00196562	13360_at	13360	ENSMUSG00000058454	NM_007856|NP_031882
Osbpl6	oxysterol binding protein-like 6	-1.55115	0.00590861	99031_at	99031	ENSMUSG00000042359	NM_145525|NP_663500
Tomm40	translocase of outer mitochondrial membrane 40 homolog (yeast)	-1.54464	0.00115207	53333_at	53333	ENSMUSG00000002984	NM_001109748|NM_016871|NP_001103218|NP_058567
Enam	enamelin	-1.53109	0.0114201	13801_at	13801	ENSMUSG00000029286	NM_017468|NP_059496
Slc45a3	solute carrier family 45, member 3	-1.52544	0.02472	212980_at	212980	ENSMUSG00000026435	NM_001177628|NM_145977|NP_001171099|NP_666089
Islr	immunoglobulin superfamily containing leucine-rich repeat	-1.52494	0.0373539	26968_at	26968	ENSMUSG00000037206	NM_001195431|NM_012043|NP_001182360|NP_036173
Tmem59l	transmembrane protein 59-like	-1.52026	0.00196999	67937_at	67937	ENSMUSG00000035964	NM_182991|NP_892036
Sema4a	sema domain, immunoglobulin domain (Ig), transmembrane domain (TM) and short cytoplasmic domain, (semaphorin) 4A	-1.51252	0.00272714	20351_at	20351	ENSMUSG00000028064	NM_001163489|NM_001163490|NM_001163491|NM_013658|NP_001156961|NP_001156962|NP_001156963|NP_038686
Slc11a2	solute carrier family 11 (proton-coupled divalent metal ion transporters), member 2	-1.50161	0.000272702	18174_at	18174	ENSMUSG00000023030	NM_001146161|NM_008732|NP_001139633|NP_032758
A830035A12Rik	RIKEN cDNA A830035A12 gene	-1.48975	0.0192229	442842_at	442842	NA	XM_920516|XM_986896|XP_925609|XP_991990
Sepw1	selenoprotein W, muscle 1	-1.4884	0.0322317	20364_at	20364	ENSMUSG00000041571	NM_009156|NP_033182
Hpn	hepsin	-1.48781	0.00493346	15451_at	15451	ENSMUSG00000001249	NM_001110252|NM_008281|NP_001103722|NP_032307
Ephx2	epoxide hydrolase 2, cytoplasmic	-1.48302	0.0255102	13850_at	13850	ENSMUSG00000022040	NM_007940|NP_031966
Igfbp1	insulin-like growth factor binding protein 1	-1.47092	0.034488	16006_at	16006	ENSMUSG00000020429	NM_008341|NP_032367
Apol7a	apolipoprotein L 7a	-1.46601	0.0155967	75761_at	75761	ENSMUSG00000010601	NM_001164640|NM_029419|NP_001158112|NP_083695
Hook2	hook homolog 2 (Drosophila)	-1.44788	0.0211796	170833_at	170833	ENSMUSG00000052566	NM_001167991|NM_133255|NP_001161463|NP_573518
Dcxr	dicarbonyl L-xylulose reductase	-1.44009	0.0362315	67880_at	67880	ENSMUSG00000039450	NM_026428|NP_080704
Slc13a3	solute carrier family 13 (sodium-dependent dicarboxylate transporter), member 3	-1.43905	0.0178553	114644_at	114644	ENSMUSG00000018459	NM_054055|NP_473396
Slc2a2	solute carrier family 2 (facilitated glucose transporter), member 2	-1.43688	0.0326841	20526_at	20526	ENSMUSG00000027690	NM_031197|NP_112474
Mapk14	mitogen-activated protein kinase 14	-1.4365	0.00961416	26416_at	26416	ENSMUSG00000053436	NM_001168508|NM_001168513|NM_001168514|NM_011951|NP_001161980|NP_001161985|NP_001161986|NP_036081
Ahr	aryl-hydrocarbon receptor	-1.43422	0.0171225	11622_at	11622	ENSMUSG00000019256	NM_013464|NP_038492
Pcyt1a	phosphate cytidylyltransferase 1, choline, alpha isoform	-1.43094	0.0309005	13026_at	13026	ENSMUSG00000005615	NM_001163159|NM_001163160|NM_009981|NP_001156631|NP_001156632|NP_034111
Sh2b1	SH2B adaptor protein 1	-1.42296	0.00139503	20399_at	20399	ENSMUSG00000030733	NM_001081459|NM_011363|NP_001074928|NP_035493
Lrp2	low density lipoprotein receptor-related protein 2	-1.41453	0.0123053	14725_at	14725	ENSMUSG00000027070	NM_001081088|NP_001074557
Tst	thiosulfate sulfurtransferase, mitochondrial	-1.41311	0.000925207	22117_at	22117	ENSMUSG00000044986	NM_009437|NP_033463
Serpina1c	serine (or cysteine) peptidase inhibitor, clade A, member 1C	-1.41103	0.0405859	20702_at	20702	ENSMUSG00000079015	NM_009245|NP_033271
Fbxw11	F-box and WD-40 domain protein 11	-1.41026	0.0081234	103583_at	103583	ENSMUSG00000020271	NM_134015|NP_598776
Apon	apolipoprotein N	-1.41022	0.0207332	28194_at	28194	ENSMUSG00000051716	NM_133996|NP_598757
Abcb6	ATP-binding cassette, sub-family B (MDR/TAP), member 6	-1.40983	0.000306027	74104_at	74104	ENSMUSG00000026198	NM_023732|NP_076221
Lsr	lipolysis stimulated lipoprotein receptor	-1.39912	0.0121836	54135_at	54135	ENSMUSG00000001247	NM_001164184|NM_001164185|NM_017405|NP_001157656|NP_001157657|NP_059101
Gc	group specific component	-1.39877	0.00251424	14473_at	14473	ENSMUSG00000035540	NM_008096|NP_032122
Asl	argininosuccinate lyase	-1.39605	0.00375963	109900_at	109900	ENSMUSG00000025533	NM_133768|NP_598529
Slc39a5	solute carrier family 39 (metal ion transporter), member 5	-1.39523	0.0365188	72002_at	72002	ENSMUSG00000039878	NM_001136237|NM_028051|NM_028092|NP_001129709|NP_082327|NP_082368
Gzmb	granzyme B	-1.39497	0.0318073	14939_at	14939	ENSMUSG00000015437	NM_013542|NP_038570
Wfdc1	WAP four-disulfide core domain 1	-1.39479	0.0106496	67866_at	67866	ENSMUSG00000023336	NM_023395|NP_075884
Apoc2	apolipoprotein C-II	-1.38804	0.00262845	11813_at	11813	ENSMUSG00000002992	NM_009695|NP_033825
Rtn1	reticulon 1	-1.38317	0.0129238	104001_at	104001	ENSMUSG00000021087	NM_001007596|NM_153457|NP_001007597|NP_703187
Map3k6	mitogen-activated protein kinase kinase kinase 6	-1.38218	0.010727	53608_at	53608	ENSMUSG00000028862	NM_016693|NP_057902
Sgk2	serum/glucocorticoid regulated kinase 2	-1.38085	0.023196	27219_at	27219	ENSMUSG00000017868	NM_013731|NP_038759
Slc16a13	solute carrier family 16 (monocarboxylic acid transporters), member 13	-1.3783	0.00990199	69309_at	69309	ENSMUSG00000044367	NM_172371|NP_758959
Dgkz	diacylglycerol kinase zeta	-1.37411	0.00716958	104418_at	104418	ENSMUSG00000040479	NM_001166597|NM_138306|NP_001160069|NP_612179
Igk-V21-10	immunoglobulin kappa chain variable 21 (V21)-10	-1.37401	0.0192928	667924_at	667924	NA	NA
Zfpm1	zinc finger protein, multitype 1	-1.37274	0.00914723	22761_at	22761	ENSMUSG00000049577	NM_009569|NP_033595
Lpar3	lysophosphatidic acid receptor 3	-1.36852	0.0179423	65086_at	65086	ENSMUSG00000036832	NM_022983|NP_075359
Scamp1	secretory carrier membrane protein 1	-1.36581	0.0347794	107767_at	107767	ENSMUSG00000021687	NM_029153|NP_083429
Slc16a3	solute carrier family 16 (monocarboxylic acid transporters), member 3	-1.36396	0.00481331	80879_at	80879	ENSMUSG00000025161	NM_001038653|NM_001038654|NM_030696|NP_001033742|NP_001033743|NP_109621
Hsd17b10	hydroxysteroid (17-beta) dehydrogenase 10	-1.36314	0.00939533	15108_at	15108	ENSMUSG00000025260	NM_016763|NP_058043
Uap1l1	UDP-N-acteylglucosamine pyrophosphorylase 1-like 1	-1.35935	0.0168132	227620_at	227620	ENSMUSG00000026956	NM_001033293|NP_001028465
Usp21	ubiquitin specific peptidase 21	-1.35757	0.0200299	30941_at	30941	ENSMUSG00000053483	NM_013919|NP_038947
Zdhhc5	zinc finger, DHHC domain containing 5	-1.35671	0.00963731	228136_at	228136	ENSMUSG00000034075	NM_144887|NP_659136
LOC100502915	hypothetical LOC100502915	-1.35189	0.00205622	100502915_at	100502915	NA	XR_106141|XR_108064
Mrgprg	MAS-related GPR, member G	-1.35029	0.0125556	381974_at	381974	ENSMUSG00000050276	NM_203492|NP_987077
Mylk3	myosin light chain kinase 3	-1.35007	0.00495642	213435_at	213435	ENSMUSG00000031698	NM_175441|NP_780650
Gpr56	G protein-coupled receptor 56	-1.34925	0.0043173	14766_at	14766	ENSMUSG00000031785	NM_001198894|NM_018882|NP_001185823|NP_061370
Slc4a1	solute carrier family 4 (anion exchanger), member 1	-1.34732	0.0211559	20533_at	20533	ENSMUSG00000006574	NM_011403|NP_035533
Gle1	GLE1 RNA export mediator (yeast)	-1.34652	0.0170944	74412_at	74412	ENSMUSG00000019715	NM_028923|NP_083199
Arhgap10	Rho GTPase activating protein 10	-1.34568	0.00851582	78514_at	78514	ENSMUSG00000037148	NM_030113|NP_084389
Cideb	cell death-inducing DNA fragmentation factor, alpha subunit-like effector B	-1.34421	0.017266	12684_at	12684	ENSMUSG00000022219	NM_009894|NP_034024
Akr7a5	aldo-keto reductase family 7, member A5 (aflatoxin aldehyde reductase)	-1.34335	0.00254422	110198_at	110198	ENSMUSG00000028743	NM_025337|NP_079613
Fah	fumarylacetoacetate hydrolase	-1.3433	0.0391224	14085_at	14085	ENSMUSG00000030630	NM_010176|NP_034306
Acss1	acyl-CoA synthetase short-chain family member 1	-1.34258	0.0356683	68738_at	68738	ENSMUSG00000027452	NM_080575|NP_542142
Ppard	peroxisome proliferator activator receptor delta	-1.34098	0.0195625	19015_at	19015	ENSMUSG00000002250	NM_011145|NP_035275
2010011I20Rik	RIKEN cDNA 2010011I20 gene	-1.3373	0.0319783	67017_at	67017	ENSMUSG00000027495	NM_025912|NP_080188
Tmem63b	transmembrane protein 63b	-1.33646	7.23939e-05	224807_at	224807	ENSMUSG00000036026	NM_198167|NP_937810
Slc47a1	solute carrier family 47, member 1	-1.33087	0.00190593	67473_at	67473	ENSMUSG00000010122	NM_026183|NP_080459
Plcb2	phospholipase C, beta 2	-1.3299	0.0415052	18796_at	18796	ENSMUSG00000040061	NM_177568|NP_808236
Paqr7	progestin and adipoQ receptor family member VII	-1.32705	0.00576684	71904_at	71904	ENSMUSG00000037348	NM_027995|NP_082271
Herpud1	homocysteine-inducible, endoplasmic reticulum stress-inducible, ubiquitin-like domain member 1	-1.32414	0.0149279	64209_at	64209	ENSMUSG00000031770	NM_022331|NP_071726
Aldh18a1	aldehyde dehydrogenase 18 family, member A1	-1.32295	0.0165241	56454_at	56454	ENSMUSG00000025007	NM_019698|NM_153554|NP_062672|NP_705782
Rab17	RAB17, member RAS oncogene family	-1.32263	0.0439838	19329_at	19329	ENSMUSG00000026304	NM_001159725|NM_008998|NP_001153197|NP_033024
Cfhr1	complement factor H-related 1	-1.31834	0.0157882	50702_at	50702	ENSMUSG00000057037	NM_015780|NP_056595
Spata13	spermatogenesis associated 13	-1.31768	0.00944605	219140_at	219140	ENSMUSG00000021990	NM_001033272|NP_001028444
Tmem98	transmembrane protein 98	-1.31663	0.0439588	103743_at	103743	ENSMUSG00000035413	NM_029537|NP_083813
Acad11	acyl-Coenzyme A dehydrogenase family, member 11	-1.315	0.00331171	102632_at	102632	ENSMUSG00000090150	NM_175324|NP_780533
Olfm2	olfactomedin 2	-1.314	0.00193596	244723_at	244723	ENSMUSG00000032172	NM_173777|NP_776138
Gmppb	GDP-mannose pyrophosphorylase B	-1.31263	0.0190224	331026_at	331026	ENSMUSG00000070284	NM_177910|NP_808578
Serpina1b	serine (or cysteine) preptidase inhibitor, clade A, member 1B	-1.31244	0.0095738	20701_at	20701	ENSMUSG00000071178	NM_009244|NP_033270
Snx8	sorting nexin 8	-1.30996	0.0230487	231834_at	231834	ENSMUSG00000029560	NM_172277|NP_758481
Cldn6	claudin 6	-1.3075	0.0374562	54419_at	54419	ENSMUSG00000023906	NM_018777|NP_061247
Zfp143	zinc finger protein 143	-1.30497	0.0310293	20841_at	20841	ENSMUSG00000061079	NM_009281|NP_033307
Atp2a3	ATPase, Ca++ transporting, ubiquitous	-1.3044	0.00226549	53313_at	53313	ENSMUSG00000020788	NM_001163336|NM_001163337|NM_016745|NP_001156808|NP_001156809|NP_058025
C9	complement component 9	-1.30198	0.0219938	12279_at	12279	ENSMUSG00000022149	NM_013485|NP_038513
Acox2	acyl-Coenzyme A oxidase 2, branched chain	-1.30194	0.0424918	93732_at	93732	ENSMUSG00000021751	NM_001161667|NM_053115|NP_001155139|NP_444345
Tubb4	tubulin, beta 4	-1.30152	0.012107	22153_at	22153	ENSMUSG00000062591	NM_009451|NP_033477
Sbf1	SET binding factor 1	-1.30144	0.0160357	77980_at	77980	ENSMUSG00000036529	NM_001081030|NM_001170561|NP_001074499|NP_001164032
Abat	4-aminobutyrate aminotransferase	-1.30105	0.0189096	268860_at	268860	ENSMUSG00000057880	NM_001170978|NM_172961|NP_001164449|NP_766549
Mab21l3	mab-21-like 3 (C. elegans)	-1.30047	0.0248754	242125_at	242125	ENSMUSG00000044313	NM_172295|NP_758499
Hpcal1	hippocalcin-like 1	-1.30031	0.00826903	53602_at	53602	ENSMUSG00000071379	NM_016677|NP_057886
Ergic1	endoplasmic reticulum-golgi intermediate compartment (ERGIC) 1	-1.29981	0.0359833	67458_at	67458	ENSMUSG00000001576	NM_026170|NP_080446
BC056474	cDNA sequence BC056474	-1.29962	0.042332	414077_at	414077	ENSMUSG00000059355	NM_001001493|NP_001001493
Gm4924	predicted gene 4924	-1.29766	0.0112018	237412_at	237412	ENSMUSG00000073427	XR_035281|XR_035297
Galntl1	UDP-N-acetyl-alpha-D-galactosamine:polypeptide N-acetylgalactosaminyltransferase-like 1	-1.29736	0.00258716	108760_at	108760	ENSMUSG00000021130	NM_001081421|NP_001074890
Fam59a	family with sequence similarity 59, member A	-1.29348	0.0406794	381126_at	381126	ENSMUSG00000042680	NM_001033445|NP_001028617
Pdk2	pyruvate dehydrogenase kinase, isoenzyme 2	-1.29346	0.0496883	18604_at	18604	ENSMUSG00000038967	NM_133667|NP_598428
Tecr	trans-2,3-enoyl-CoA reductase	-1.2921	0.00735046	106529_at	106529	ENSMUSG00000031708	NM_027179|NM_134118|NP_081455|NP_598879
Sox13	SRY-box containing gene 13	-1.29162	0.00867259	20668_at	20668	ENSMUSG00000070643	NM_011439|NP_035569
Acpl2	acid phosphatase-like 2	-1.29072	0.0239993	235534_at	235534	ENSMUSG00000043587	NM_153420|NP_700469
Vmn1r218	vomeronasal 1 receptor 218	-1.28968	0.00250316	171256_at	171256	ENSMUSG00000060490	NM_134222|NP_598983
Itga3	integrin alpha 3	-1.289	0.0410654	16400_at	16400	ENSMUSG00000001507	NM_013565|NP_038593
Hnf4a	hepatic nuclear factor 4, alpha	-1.28743	0.011334	15378_at	15378	ENSMUSG00000017950	NM_008261|NP_032287
Aadat	aminoadipate aminotransferase	-1.28629	0.0313302	23923_at	23923	ENSMUSG00000057228	NM_011834|NP_035964
Sec16b	SEC16 homolog B (S. cerevisiae)	-1.28567	0.0143716	89867_at	89867	ENSMUSG00000026589	NM_001159986|NM_033354|NP_001153458|NP_203505|NR_027641
Grb7	growth factor receptor bound protein 7	-1.28496	0.0106822	14786_at	14786	ENSMUSG00000019312	NM_010346|NP_034476
B4galnt1	beta-1,4-N-acetyl-galactosaminyl transferase 1	-1.2822	0.0480876	14421_at	14421	ENSMUSG00000006731	NM_008080|NM_027739|NP_032106|NP_082015
Nfe2l3	nuclear factor, erythroid derived 2, like 3	-1.28123	0.020707	18025_at	18025	ENSMUSG00000029832	NM_010903|NP_035033
Fntb	farnesyltransferase, CAAX box, beta	-1.28115	0.0123781	110606_at	110606	ENSMUSG00000033373	NM_145927|NP_666039
Stra6	stimulated by retinoic acid gene 6	-1.28097	0.00654407	20897_at	20897	ENSMUSG00000032327	NM_001162475|NM_001162476|NM_001162479|NM_009291|NP_001155947|NP_001155948|NP_001155951|NP_033317
Apoe	apolipoprotein E	-1.27974	0.00859122	11816_at	11816	ENSMUSG00000002985	NM_009696|NP_033826
Sorbs3	sorbin and SH3 domain containing 3	-1.27964	0.0150889	20410_at	20410	ENSMUSG00000022091	NM_011366|NP_035496
F2	coagulation factor II	-1.27964	0.0188161	14061_at	14061	ENSMUSG00000027249	NM_010168|NP_034298
Pglyrp1	peptidoglycan recognition protein 1	-1.27928	0.0200603	21946_at	21946	ENSMUSG00000030413	NM_009402|NP_033428
Atp6v0a1	ATPase, H+ transporting, lysosomal V0 subunit A1	-1.27831	0.00690502	11975_at	11975	ENSMUSG00000019302	NM_016920|NP_058616
Dgat2	diacylglycerol O-acyltransferase 2	-1.27745	0.0437497	67800_at	67800	ENSMUSG00000030747	NM_026384|NP_080660
Fabp1	fatty acid binding protein 1, liver	-1.27726	0.0432453	14080_at	14080	ENSMUSG00000054422	NM_017399|NP_059095
Tspan4	tetraspanin 4	-1.27654	0.0275084	64540_at	64540	ENSMUSG00000025511	NM_053082|NP_444312
Tmem51	transmembrane protein 51	-1.27649	0.0108654	214359_at	214359	ENSMUSG00000040616	NM_145402|NP_663377
Tbc1d2b	TBC1 domain family, member 2B	-1.27537	0.0388107	67016_at	67016	ENSMUSG00000037410	NM_194334|NP_919315
Fkbp8	FK506 binding protein 8	-1.27528	0.0197254	14232_at	14232	ENSMUSG00000019428	NM_001111066|NM_001199631|NM_010223|NP_001104536|NP_001186560|NP_034353
Gm5141	predicted gene 5141	-1.27432	0.0323887	380850_at	380850	ENSMUSG00000091183	XM_001472146|XM_001477745|XP_001472196|XP_001477795
Tomm6	translocase of outer mitochondrial membrane 6 homolog (yeast)	-1.27411	0.00791203	66119_at	66119	ENSMUSG00000033475	NM_001164729|NM_025365|NP_001158201|NP_079641
E130114P18Rik	RIKEN cDNA E130114P18 gene	-1.27231	0.0312301	319865_at	319865	NA	NR_015513
Trim10	tripartite motif-containing 10	-1.27218	0.0282633	19824_at	19824	ENSMUSG00000073400	NM_011280|NP_035410
Myo7b	myosin VIIB	-1.27148	0.0181748	17922_at	17922	ENSMUSG00000024388	NM_032394|NP_115770
Tmem176b	transmembrane protein 176B	-1.27038	0.0371076	65963_at	65963	ENSMUSG00000029810	NM_001164207|NM_001164208|NM_001164209|NM_023056|NP_001157679|NP_001157680|NP_001157681|NP_075543
H2-M10.5	histocompatibility 2, M region locus 10.5	-1.26992	0.0140029	224761_at	224761	ENSMUSG00000037246	NM_177637|NP_808305
Gm5629	predicted gene 5629	-1.26959	0.0376734	434609_at	434609	NA	NA
Lass4	LAG1 homolog, ceramide synthase 4	-1.26917	0.0379865	67260_at	67260	ENSMUSG00000008206	NM_026058|NP_080334
Adck2	aarF domain containing kinase 2	-1.26856	0.0212947	57869_at	57869	ENSMUSG00000046947	NM_178873|NP_849204
Asgr2	asialoglycoprotein receptor 2	-1.26798	0.00461988	11890_at	11890	ENSMUSG00000040963	NM_007493|NP_031519
Ppil1	peptidylprolyl isomerase (cyclophilin)-like 1	-1.26782	0.0328606	68816_at	68816	ENSMUSG00000024007	NM_026845|NP_081121
Rab7l1	RAB7, member RAS oncogene family-like 1	-1.26746	0.0335142	226422_at	226422	ENSMUSG00000026433	NM_144875|NP_659124
Krt20	keratin 20	-1.26635	0.0446046	66809_at	66809	ENSMUSG00000035775	NM_023256|NP_075745
Anapc5	anaphase-promoting complex subunit 5	-1.26578	0.0131084	59008_at	59008	ENSMUSG00000029472	NM_001042491|NM_021505|NP_001035956|NP_067480
Pgm3	phosphoglucomutase 3	-1.26491	0.0281519	109785_at	109785	ENSMUSG00000056131	NM_001163746|NM_028352|NP_001157218|NP_082628
Pgm2	phosphoglucomutase 2	-1.26423	0.00346128	72157_at	72157	ENSMUSG00000025791	NM_028132|NP_082408
Sigirr	single immunoglobulin and toll-interleukin 1 receptor (TIR) domain	-1.26268	0.035467	24058_at	24058	ENSMUSG00000025494	NM_023059|NP_075546
Kars	lysyl-tRNA synthetase	-1.26232	0.00461787	85305_at	85305	ENSMUSG00000031948	NM_001130868|NM_053092|NP_001124340|NP_444322
Card10	caspase recruitment domain family, member 10	-1.26216	0.0288428	105844_at	105844	ENSMUSG00000033170	NM_130859|NP_570929
Sepx1	selenoprotein X 1	-1.26004	0.026002	27361_at	27361	ENSMUSG00000075705	NM_013759|NP_038787
Igfbp4	insulin-like growth factor binding protein 4	-1.25912	0.010932	16010_at	16010	ENSMUSG00000017493	NM_010517|NP_034647
Vmn1r22	vomeronasal 1 receptor 22	-1.25886	0.00957679	171196_at	171196	ENSMUSG00000059362	NM_134178|NP_598939
Alpl	alkaline phosphatase, liver/bone/kidney	-1.25836	0.0487959	11647_at	11647	ENSMUSG00000028766	NM_007431|NP_031457
Rbck1	RanBP-type and C3HC4-type zinc finger containing 1	-1.25801	0.0383236	24105_at	24105	ENSMUSG00000027466	NM_001083921|NM_019705|NP_001077390|NP_062679
Gpr34	G protein-coupled receptor 34	-1.25739	0.0342992	23890_at	23890	ENSMUSG00000040229	NM_011823|NP_035953
Vill	villin-like	-1.25714	0.0275627	22351_at	22351	ENSMUSG00000038775	NM_001164567|NM_011700|NP_001158039|NP_035830
Tepp	testis, prostate and placenta expressed	-1.25671	0.0202346	73407_at	73407	ENSMUSG00000090206	NM_028532|NM_199455|NP_082808|NP_955534
Spns2	spinster homolog 2 (Drosophila)	-1.25664	0.0358011	216892_at	216892	ENSMUSG00000040447	NM_153060|NP_694700
Btnl9	butyrophilin-like 9	-1.25403	0.00765556	237754_at	237754	ENSMUSG00000040283	NM_172793|NP_766381
Apoc4	apolipoprotein C-IV	-1.25371	0.0298633	11425_at	11425	ENSMUSG00000074336	NM_007385|NP_031411
Klhdc3	kelch domain containing 3	-1.25336	0.00225221	71765_at	71765	ENSMUSG00000063576	NM_001163729|NM_027910|NP_001157201|NP_082186
Ncln	nicalin homolog (zebrafish)	-1.2526	0.0376091	103425_at	103425	ENSMUSG00000020238	NM_134009|NP_598770
Bysl	bystin-like	-1.25237	0.031809	53414_at	53414	ENSMUSG00000023988	NM_016859|NP_058555
Eps8l2	EPS8-like 2	-1.252	0.0135512	98845_at	98845	ENSMUSG00000025504	NM_133191|NP_573454
Txndc11	thioredoxin domain containing 11	-1.24837	0.0333074	106200_at	106200	ENSMUSG00000022498	NM_029582|NM_134105|NP_083858|NP_598866
Dapk3	death-associated protein kinase 3	-1.24826	0.0469998	13144_at	13144	ENSMUSG00000034974	NM_001190473|NM_001190474|NM_007828|NP_001177402|NP_001177403|NP_031854
Rhobtb1	Rho-related BTB domain containing 1	-1.24776	0.00539166	69288_at	69288	ENSMUSG00000019944	NM_001081347|NP_001074816
5930434B04Rik	RIKEN cDNA 5930434B04 gene	-1.2477	0.0492861	381356_at	381356	ENSMUSG00000015488	NM_029862|NP_084138
Nudt5	nudix (nucleoside diphosphate linked moiety X)-type motif 5	-1.24746	0.0231209	53893_at	53893	ENSMUSG00000025817	NM_016918|NP_058614
Cx3cr1	chemokine (C-X3-C) receptor 1	-1.24739	0.00366439	13051_at	13051	ENSMUSG00000052336	NM_009987|NP_034117
Nnt	nicotinamide nucleotide transhydrogenase	-1.24732	0.0249618	18115_at	18115	ENSMUSG00000025453	NM_008710|NP_032736|NR_003544
Zfyve26	zinc finger, FYVE domain containing 26	-1.24693	0.0126972	211978_at	211978	ENSMUSG00000066440	NM_001008550|NP_001008550
Gmpr	guanosine monophosphate reductase	-1.24528	0.0241366	66355_at	66355	ENSMUSG00000000253	NM_025508|NP_079784
Prr12	proline rich 12	-1.24519	0.0153632	233210_at	233210	ENSMUSG00000046574	NM_175022|NP_778187
Ttr	transthyretin	-1.24465	0.0251295	22139_at	22139	ENSMUSG00000061808	NM_013697|NP_038725
Rabep2	rabaptin, RAB GTPase binding effector protein 2	-1.24438	0.00423651	70314_at	70314	ENSMUSG00000030727	NM_030566|NP_085043
Lbp	lipopolysaccharide binding protein	-1.2432	0.0223441	16803_at	16803	ENSMUSG00000016024	NM_008489|NP_032515
Txlna	taxilin alpha	-1.24178	0.0078057	109658_at	109658	ENSMUSG00000053841	NM_001005506|NM_001199695|NP_001005506|NP_001186624
Plxnb2	plexin B2	-1.24122	0.0215457	140570_at	140570	ENSMUSG00000036606	NM_001159521|NM_138749|NP_001152993|NP_620088
Bap1	Brca1 associated protein 1	-1.24044	0.0118096	104416_at	104416	ENSMUSG00000021901	NM_027088|NP_081364
Abtb2	ankyrin repeat and BTB (POZ) domain containing 2	-1.24033	0.028249	99382_at	99382	ENSMUSG00000032724	NM_178890|NP_849221
Col15a1	collagen, type XV, alpha 1	-1.24013	0.0287869	12819_at	12819	ENSMUSG00000028339	NM_009928|NP_034058
Med15	mediator complex subunit 15	-1.23987	0.00463467	94112_at	94112	ENSMUSG00000012114	NM_001040683|NM_033609|NP_001035773|NP_291087
Nrsn1	neurensin 1	-1.23841	0.00885043	22360_at	22360	ENSMUSG00000048978	NM_009513|NP_033539
Itgb4	integrin beta 4	-1.23744	0.0393627	192897_at	192897	ENSMUSG00000020758	NM_001005608|NM_133663|NP_001005608|NP_598424
Abca14	ATP-binding cassette, sub-family A (ABC1), member 14	-1.23732	0.0300001	67928_at	67928	ENSMUSG00000062017	NM_026458|NP_080734
Rab1b	RAB1B, member RAS oncogene family	-1.23716	0.0337749	76308_at	76308	ENSMUSG00000024870	NM_029576|NP_083852
Zfp128	zinc finger protein 128	-1.23697	0.0200171	243833_at	243833	ENSMUSG00000060397	NM_153802|NP_722497
Slc25a37	solute carrier family 25, member 37	-1.23643	0.0188412	67712_at	67712	ENSMUSG00000034248	NM_026331|NP_080607
Notch4	Notch gene homolog 4 (Drosophila)	-1.23558	0.0338384	18132_at	18132	ENSMUSG00000015468	NM_010929|NP_035059
Btn3a3	butyrophilin, subfamily 3, member A3	-1.23383	0.0177122	632126_at	632126	ENSMUSG00000058435	NM_030746|NP_109671
Kifc3	kinesin family member C3	-1.23276	0.0100476	16582_at	16582	ENSMUSG00000031788	NM_001145831|NM_001145832|NM_010631|NP_001139303|NP_001139304|NP_034761
Olfr853	olfactory receptor 853	-1.23163	0.000888958	258908_at	258908	ENSMUSG00000051160	NM_146906|NP_667117
Smcr7l	Smith-Magenis syndrome chromosome region, candidate 7-like (human)	-1.23115	0.00639797	239555_at	239555	ENSMUSG00000022412	NM_178719|NP_848834
Serpinf1	serine (or cysteine) peptidase inhibitor, clade F, member 1	-1.23112	0.0382158	20317_at	20317	ENSMUSG00000000753	NM_011340|NP_035470
Nr4a1	nuclear receptor subfamily 4, group A, member 1	-1.23001	0.0186644	15370_at	15370	ENSMUSG00000023034	NM_010444|NP_034574
Sfxn1	sideroflexin 1	-1.22998	0.0176954	14057_at	14057	ENSMUSG00000021474	NM_027324|NP_081600
Me2	malic enzyme 2, NAD(+)-dependent, mitochondrial	-1.22958	0.0437159	107029_at	107029	ENSMUSG00000024556	NM_145494|NP_663469
Cryz	crystallin, zeta	-1.22918	0.0174181	12972_at	12972	ENSMUSG00000028199	NM_009968|NP_034098
4931422A03Rik	RIKEN cDNA 4931422A03 gene	-1.22722	0.0399873	70986_at	70986	NA	XR_104697|XR_107381
Slc6a13	solute carrier family 6 (neurotransmitter transporter, GABA), member 13	-1.22659	0.0476641	14412_at	14412	ENSMUSG00000030108	NM_144512|NP_653095
Dusp14	dual specificity phosphatase 14	-1.22655	0.0173227	56405_at	56405	ENSMUSG00000018648	NM_019819|NP_062793
Aldoart2	aldolase 1 A retrogene 2	-1.22623	0.0337046	79459_at	79459	ENSMUSG00000063129	NR_003959
D730039F16Rik	RIKEN cDNA D730039F16 gene	-1.22617	0.0385488	77996_at	77996	ENSMUSG00000026870	NM_030021|NP_084297
Cog1	component of oligomeric golgi complex 1	-1.22547	0.0101854	16834_at	16834	ENSMUSG00000018661	NM_013581|NP_038609
Tmem106c	transmembrane protein 106C	-1.22383	0.0364057	380967_at	380967	ENSMUSG00000052369	NM_201359|NP_958747
Ica1l	islet cell autoantigen 1-like	-1.22372	0.0105194	70375_at	70375	ENSMUSG00000026018	NM_027407|NP_081683
Dbnl	drebrin-like	-1.2233	0.0123864	13169_at	13169	ENSMUSG00000020476	NM_001146308|NM_001146309|NM_013810|NP_001139780|NP_001139781|NP_038838
Fam196b	family with sequence similarity 196, member B	-1.22322	0.0436933	574403_at	574403	ENSMUSG00000069911	NM_001025382|NP_001020553
Tas2r138	taste receptor, type 2, member 138	-1.22149	0.00126486	387513_at	387513	ENSMUSG00000058250	NM_001001451|NP_001001451
4931414P19Rik	RIKEN cDNA 4931414P19 gene	-1.21973	0.032533	74359_at	74359	ENSMUSG00000022179	NM_028890|NP_083166
Stat5b	signal transducer and activator of transcription 5B	-1.2186	0.0294777	20851_at	20851	ENSMUSG00000020919	NM_001113563|NM_011489|NP_001107035|NP_035619
AY026312	cDNA sequence AY026312	-1.21852	0.0286086	170939_at	170939	ENSMUSG00000057174	NM_133359|NP_579937
Aco1	aconitase 1	-1.21832	0.03573	11428_at	11428	ENSMUSG00000028405	NM_007386|NP_031412
Zfp362	zinc finger protein 362	-1.21787	0.0310572	230761_at	230761	ENSMUSG00000028799	NM_001081098|NP_001074567
Cln6	ceroid-lipofuscinosis, neuronal 6	-1.21781	0.0238979	76524_at	76524	ENSMUSG00000032245	NM_001033175|NP_001028347
Mttp	microsomal triglyceride transfer protein	-1.21781	0.0458378	17777_at	17777	ENSMUSG00000028158	NM_001163457|NM_008642|NP_001156929|NP_032668
Myo7a	myosin VIIA	-1.21737	0.00944435	17921_at	17921	ENSMUSG00000030761	NM_008663|NP_032689
Lace1	lactation elevated 1	-1.2165	0.0451027	215951_at	215951	ENSMUSG00000038302	NM_145743|NP_665686
Serpinb8	serine (or cysteine) peptidase inhibitor, clade B, member 8	-1.21624	0.00973312	20725_at	20725	ENSMUSG00000026315	NM_001159748|NM_011459|NP_001153220|NP_035589
Gm9753	predicted gene 9753	-1.2161	0.0120474	791382_at	791382	NA	XM_003085133|XM_003086071|XP_003085181|XP_003086119
Ftmt	ferritin mitochondrial	-1.21606	0.0406114	67634_at	67634	ENSMUSG00000024510	NM_026286|NP_080562
Ubtd1	ubiquitin domain containing 1	-1.2157	0.0379307	226122_at	226122	ENSMUSG00000025171	NM_145500|NP_663475
Pnpo	pyridoxine 5'-phosphate oxidase	-1.21448	0.0171662	103711_at	103711	ENSMUSG00000018659	NM_134021|NP_598782
Bcas3	breast carcinoma amplified sequence 3	-1.21431	0.0346034	192197_at	192197	ENSMUSG00000059439	NM_001166642|NM_001166643|NM_138681|NP_001160114|NP_001160115|NP_619622
4933428M09Rik	RIKEN cDNA 4933428M09 gene	-1.21405	0.0249775	71248_at	71248	ENSMUSG00000042525	XM_001473792|XM_001475652|XP_001473842|XP_001475702
Pdgfb	platelet derived growth factor, B polypeptide	-1.21347	0.0223329	18591_at	18591	ENSMUSG00000000489	NM_011057|NP_035187
Zfp92	zinc finger protein 92	-1.21337	0.037381	22754_at	22754	ENSMUSG00000031374	NM_009566|NP_033592
Inpp1	inositol polyphosphate-1-phosphatase	-1.21245	0.0256188	16329_at	16329	ENSMUSG00000026102	NM_008384|NP_032410
Cdc25b	cell division cycle 25 homolog B (S. pombe)	-1.21241	0.0104337	12531_at	12531	ENSMUSG00000027330	NM_001111075|NM_023117|NP_001104545|NP_075606
Zfp710	zinc finger protein 710	-1.21178	0.0247685	209225_at	209225	ENSMUSG00000048897	NM_001145999|NM_001146000|NM_175433|NP_001139471|NP_001139472|NP_780642
Hn1l	hematological and neurological expressed 1-like	-1.21146	0.0391132	52009_at	52009	ENSMUSG00000024165	NM_198937|NP_945175
Slc6a8	solute carrier family 6 (neurotransmitter transporter, creatine), member 8	-1.21114	0.0143057	102857_at	102857	ENSMUSG00000019558	NM_001142809|NM_001142810|NM_133987|NP_001136281|NP_001136282|NP_598748
Slc48a1	solute carrier family 48 (heme transporter), member 1	-1.21069	0.0412868	67739_at	67739	ENSMUSG00000081534	NM_026353|NP_080629
Qars	glutaminyl-tRNA synthetase	-1.21055	0.01308	97541_at	97541	ENSMUSG00000032604	NM_001168270|NM_133794|NP_001161742|NP_598555
Fam83c	family with sequence similarity 83, member C	-1.21023	0.0146164	71405_at	71405	ENSMUSG00000074647	NM_027788|NP_082064
Arhgef10	Rho guanine nucleotide exchange factor (GEF) 10	-1.20901	0.0388712	234094_at	234094	ENSMUSG00000071176	NM_001037736|NM_172751|NP_001032825|NP_766339
Zfp668	zinc finger protein 668	-1.20884	0.040298	244219_at	244219	ENSMUSG00000049728	NM_146259|NP_666371
Lpcat3	lysophosphatidylcholine acyltransferase 3	-1.20766	0.0170157	14792_at	14792	ENSMUSG00000004270	NM_145130|NP_660112
Pnmal1	PNMA-like 1	-1.20727	0.0252047	71691_at	71691	ENSMUSG00000041141	NM_001007569|NP_001007570
Hapln4	hyaluronan and proteoglycan link protein 4	-1.20576	0.0129233	330790_at	330790	ENSMUSG00000007594	NM_177900|NP_808568
Fgf4	fibroblast growth factor 4	-1.20533	0.0331314	14175_at	14175	ENSMUSG00000050917	NM_010202|NP_034332
Apeh	acylpeptide hydrolase	-1.20518	0.046029	235606_at	235606	ENSMUSG00000032590	NM_146226|NP_666338
Atg13	ATG13 autophagy related 13 homolog (S. cerevisiae)	-1.20502	0.0360023	51897_at	51897	ENSMUSG00000027244	NM_145528|NP_663503
Tspan7	tetraspanin 7	-1.20478	0.0175286	21912_at	21912	ENSMUSG00000058254	NM_019634|NP_062608
Zfat	zinc finger and AT hook domain containing	-1.20437	0.0131401	380993_at	380993	ENSMUSG00000022335	NM_001145888|NM_198644|NP_001139360|NP_941046
Atrip	ATR interacting protein	-1.20427	0.0139129	235610_at	235610	ENSMUSG00000025646	NM_172774|NP_766362
Rbm38	RNA binding motif protein 38	-1.20419	0.0409893	56190_at	56190	ENSMUSG00000027510	NM_019547|NP_062420
Flt4	FMS-like tyrosine kinase 4	-1.20263	0.0162063	14257_at	14257	ENSMUSG00000020357	NM_008029|NP_032055
E130309D02Rik	RIKEN cDNA E130309D02 gene	-1.20261	0.0268116	231868_at	231868	ENSMUSG00000039244	NM_172726|NP_766314
Nosip	nitric oxide synthase interacting protein	-1.20258	0.0108844	66394_at	66394	ENSMUSG00000003421	NM_001163684|NM_025533|NP_001157156|NP_079809
Bag2	BCL2-associated athanogene 2	-1.20169	0.0485575	213539_at	213539	ENSMUSG00000042215	NM_145392|NP_663367
Qpct	glutaminyl-peptide cyclotransferase (glutaminyl cyclase)	1.2001	0.0255927	70536_at	70536	ENSMUSG00000024084	NM_027455|NP_081731
Gm9883	predicted gene 9883	1.20207	0.0186074	791409_at	791409	NA	XM_003085247|XM_003086119|XP_003085295|XP_003086167
Olfr220	olfactory receptor 220	1.20214	0.0301708	546747_at	546747	ENSMUSG00000066671	NM_207694|NP_997577
Snrnp40	small nuclear ribonucleoprotein 40 (U5)	1.2024	0.010165	66585_at	66585	ENSMUSG00000074088	NM_025645|NP_079921
Olfr732	olfactory receptor 732	1.2024	0.0191619	258659_at	258659	ENSMUSG00000091873	NM_146665|NP_666876
Wdr35	WD repeat domain 35	1.20318	0.0304086	74682_at	74682	ENSMUSG00000066643	NM_001159527|NM_172470|NP_001152999|NP_766058
Map3k1	mitogen-activated protein kinase kinase kinase 1	1.20349	0.0175325	26401_at	26401	ENSMUSG00000021754	NM_011945|NP_036075
Olfr735	olfactory receptor 735	1.20692	0.00397259	257909_at	257909	ENSMUSG00000046210	NM_001011754|NP_001011754
Uap1	UDP-N-acetylglucosamine pyrophosphorylase 1	1.20718	0.0478298	107652_at	107652	ENSMUSG00000026670	NM_133806|NP_598567
Prl8a1	prolactin family 8, subfamily a, member 1	1.20765	0.0205468	73244_at	73244	ENSMUSG00000019756	NM_028477|NP_082753
Trim68	tripartite motif-containing 68	1.20902	0.033054	101700_at	101700	ENSMUSG00000073968	NM_198012|NP_932129
Klf8	Kruppel-like factor 8	1.20968	0.0195847	245671_at	245671	ENSMUSG00000041649	NM_173780|NP_776141
Ipo8	importin 8	1.21005	0.011485	320727_at	320727	ENSMUSG00000040029	NM_001081113|NP_001074582
Adm	adrenomedullin	1.2102	0.0217318	11535_at	11535	ENSMUSG00000030790	NM_009627|NP_033757
Adora2b	adenosine A2b receptor	1.21092	0.00877818	11541_at	11541	ENSMUSG00000018500	NM_007413|NP_031439
2410066E13Rik	RIKEN cDNA 2410066E13 gene	1.21171	0.0283805	68235_at	68235	ENSMUSG00000038065	NM_026629|NP_080905
Nop14	NOP14 nucleolar protein homolog (yeast)	1.21181	0.0440282	75416_at	75416	ENSMUSG00000036693	NM_029278|NP_083554
Ocrl	oculocerebrorenal syndrome of Lowe	1.21225	0.0472037	320634_at	320634	ENSMUSG00000001173	NM_177215|NP_796189
1110008L16Rik	RIKEN cDNA 1110008L16 gene	1.21247	0.0167382	66132_at	66132	ENSMUSG00000021023	NM_025373|NP_079649
Ccbe1	collagen and calcium binding EGF domains 1	1.21285	0.0254997	320924_at	320924	ENSMUSG00000046318	NM_178793|NP_848908
Coch	coagulation factor C homolog (Limulus polyphemus)	1.21324	0.02361	12810_at	12810	ENSMUSG00000020953	NM_001198835|NM_007728|NP_001185764|NP_031754
BC065397	cDNA sequence BC065397	1.21336	0.00241551	436230_at	436230	NA	NR_033324
Clec2e	C-type lectin domain family 2, member e	1.21462	0.00225826	232409_at	232409	ENSMUSG00000030155	NM_153506|NP_705726
Rab33a	RAB33A, member of RAS oncogene family	1.21559	0.00984037	19337_at	19337	ENSMUSG00000031104	NM_011228|NP_035358
Veph1	ventricular zone expressed PH domain homolog 1 (zebrafish)	1.21582	0.015023	72789_at	72789	ENSMUSG00000027831	NM_028357|NM_145820|NP_082633|NP_665819
Sctr	secretin receptor	1.21686	0.005764	319229_at	319229	ENSMUSG00000026387	NM_001012322|NP_001012322
3110043O21Rik	RIKEN cDNA 3110043O21 gene	1.21829	0.0370257	73205_at	73205	ENSMUSG00000028300	NM_001081343|NP_001074812
Lrig3	leucine-rich repeats and immunoglobulin-like domains 3	1.21929	0.0176182	320398_at	320398	ENSMUSG00000020105	NM_177152|NP_796126
Mrpl41	mitochondrial ribosomal protein L41	1.21966	0.0433093	107733_at	107733	ENSMUSG00000036850	NM_001031808|NP_001026978
Ttc39b	tetratricopeptide repeat domain 39B	1.22041	0.0110987	69863_at	69863	ENSMUSG00000038172	NM_027238|NP_081514
Ccl7	chemokine (C-C motif) ligand 7	1.22106	0.00542532	20306_at	20306	ENSMUSG00000035373	NM_013654|NP_038682
Pthlh	parathyroid hormone-like peptide	1.2213	0.00357134	19227_at	19227	ENSMUSG00000048776	NM_008970|NP_032996
Lama4	laminin, alpha 4	1.22198	0.00334598	16775_at	16775	ENSMUSG00000019846	NM_010681|NP_034811
Eif2a	eukaryotic translation initiation factor 2A	1.22222	0.0269194	229317_at	229317	ENSMUSG00000027810	NM_001005509|NP_001005509
Nsun6	NOL1/NOP2/Sun domain family member 6	1.2237	0.0052732	74455_at	74455	ENSMUSG00000026707	NM_001165941|NM_001165942|NM_001165943|NM_028950|NP_001159413|NP_001159414|NP_001159415|NP_083226
Serpini1	serine (or cysteine) peptidase inhibitor, clade I, member 1	1.22371	0.0163173	20713_at	20713	ENSMUSG00000027834	NM_009250|NP_033276
Adcyap1r1	adenylate cyclase activating polypeptide 1 receptor 1	1.22417	0.0241433	11517_at	11517	ENSMUSG00000029778	NM_001025372|NM_007407|NP_001020543|NP_031433
Rc3h1	RING CCCH (C3H) domains 1	1.22522	0.0452975	381305_at	381305	ENSMUSG00000040423	NM_001024952|NP_001020123
Alkbh2	alkB, alkylation repair homolog 2 (E. coli)	1.22612	0.0302393	231642_at	231642	ENSMUSG00000044339	NM_175016|NP_778181
4933427G17Rik	RIKEN cDNA 4933427G17 gene	1.22615	0.0155669	74466_at	74466	ENSMUSG00000030877	NM_028955|NP_083231|XM_003084731|XM_003086638|XM_133717|XM_915104|XP_003084779|XP_003086686|XP_133717|XP_920197
Cog5	component of oligomeric golgi complex 5	1.22619	0.00486962	238123_at	238123	ENSMUSG00000035933	NM_001163126|NP_001156598
Dnajc15	DnaJ (Hsp40) homolog, subfamily C, member 15	1.22692	0.015052	66148_at	66148	ENSMUSG00000022013	NM_025384|NP_079660
Pwp1	PWP1 homolog (S. cerevisiae)	1.22717	0.0139433	103136_at	103136	ENSMUSG00000001785	NM_133993|NP_598754
Atp6v0a4	ATPase, H+ transporting, lysosomal V0 subunit A4	1.22781	0.00639761	140494_at	140494	ENSMUSG00000038600	NM_080467|NP_536715
A030009H04Rik	RIKEN cDNA A030009H04 gene	1.22784	0.0255386	80515_at	80515	NA	NR_027827
Pdcd2	programmed cell death 2	1.22799	0.016046	18567_at	18567	ENSMUSG00000014771	NM_008799|NP_032825
Mrpl33	mitochondrial ribosomal protein L33	1.22861	0.0322939	66845_at	66845	ENSMUSG00000029142	NM_025796|NP_080072
Urb2	URB2 ribosome biogenesis 2 homolog (S. cerevisiae)	1.22885	0.0490354	382038_at	382038	ENSMUSG00000031976	NM_001029876|NP_001025047
Sec22c	SEC22 vesicle trafficking protein homolog C (S. cerevisiae)	1.229	0.00464295	215474_at	215474	ENSMUSG00000061536	NM_001164562|NM_178677|NP_001158034|NP_848792
1500011K16Rik	RIKEN cDNA 1500011K16 gene	1.23023	0.0251875	67885_at	67885	NA	NR_015476
Myl10	myosin, light chain 10, regulatory	1.23078	0.00500765	59310_at	59310	ENSMUSG00000005474	NM_001085387|NM_021611|NP_001078856|NP_067624
Gm4907	predicted gene 4907	1.23163	0.0148405	236749_at	236749	ENSMUSG00000068113	NM_001034864|NP_001030036
Cysltr2	cysteinyl leukotriene receptor 2	1.23164	0.02853	70086_at	70086	ENSMUSG00000033470	NM_001162412|NM_133720|NP_001155884|NP_598481
Cyp26b1	cytochrome P450, family 26, subfamily b, polypeptide 1	1.23212	0.00421457	232174_at	232174	ENSMUSG00000063415	NM_001177713|NM_175475|NP_001171184|NP_780684
Svil	supervillin	1.2324	0.0062986	225115_at	225115	ENSMUSG00000024236	NM_153153|NP_694793
Haus1	HAUS augmin-like complex, subunit 1	1.23259	0.0367941	225745_at	225745	ENSMUSG00000041840	NM_146089|NP_666201
Csf2rb	colony stimulating factor 2 receptor, beta, low-affinity (granulocyte-macrophage)	1.23403	0.0485113	12983_at	12983	ENSMUSG00000071713	NM_007780|NP_031806
Mccc2	methylcrotonoyl-Coenzyme A carboxylase 2 (beta)	1.23417	0.0384207	78038_at	78038	ENSMUSG00000021646	NM_030026|NP_084302
Ceacam3	carcinoembryonic antigen-related cell adhesion molecule 3	1.23497	0.0388807	384557_at	384557	ENSMUSG00000053228	NM_054059|NP_473400|XM_003086555|XM_357710|XP_003086603|XP_357710
Cd302	CD302 antigen	1.2366	0.00566614	66205_at	66205	ENSMUSG00000060703	NM_025422|NP_079698
Ccdc112	coiled-coil domain containing 112	1.23685	0.0376987	240261_at	240261	ENSMUSG00000071855	NM_001160399|NP_001153871
Olfr391-ps	olfactory receptor 391, pseudogene	1.23696	0.0102512	258236_at	258236	ENSMUSG00000070382	NM_001159775|NP_001153247
Pde6d	phosphodiesterase 6D, cGMP-specific, rod, delta	1.23808	0.0192718	18582_at	18582	ENSMUSG00000026239	NM_008801|NP_032827|XR_106084|XR_107270
P2rx6	purinergic receptor P2X, ligand-gated ion channel, 6	1.23966	0.0161037	18440_at	18440	ENSMUSG00000022758	NM_001159561|NM_011028|NP_001153033|NP_035158
6430573F11Rik	RIKEN cDNA 6430573F11 gene	1.24095	0.0312741	319582_at	319582	ENSMUSG00000039620	NM_176952|NP_795926
Mical2	microtubule associated monoxygenase, calponin and LIM domain containing 2	1.24111	0.0360016	320878_at	320878	ENSMUSG00000038244	NM_001193305|NM_177282|NP_001180234|NP_796256
1110007C09Rik	RIKEN cDNA 1110007C09 gene	1.24115	0.041557	68480_at	68480	ENSMUSG00000037960	NM_026738|NP_081014
Txndc16	thioredoxin domain containing 16	1.24164	0.0232597	70561_at	70561	ENSMUSG00000021830	NM_172597|NP_766185
Trnau1ap	tRNA selenocysteine 1 associated protein 1	1.24186	0.0367744	71787_at	71787	ENSMUSG00000028898	NM_027925|NP_082201
Prtg	protogenin homolog (Gallus gallus)	1.24344	0.0480787	235472_at	235472	ENSMUSG00000036030	NM_175485|NP_780694
Scgn	secretagogin, EF-hand calcium binding protein	1.24619	0.0238578	214189_at	214189	ENSMUSG00000021337	NM_145399|NP_663374
4930581F22Rik	RIKEN cDNA 4930581F22 gene	1.2473	0.00571731	78934_at	78934	NA	NR_029475
Oxnad1	oxidoreductase NAD-binding domain containing 1	1.24791	0.0209989	218885_at	218885	ENSMUSG00000021906	NM_145460|NP_663435
F11	coagulation factor XI	1.24815	0.0313946	109821_at	109821	ENSMUSG00000031645	NM_028066|NP_082342
Fam19a3	family with sequence similarity 19, member A3	1.24882	0.0401893	329731_at	329731	ENSMUSG00000055865	NM_183224|NP_899047
Tmpo	thymopoietin	1.24987	0.0118491	21917_at	21917	ENSMUSG00000019961	NM_001080129|NM_001080130|NM_001080131|NM_001080132|NM_001080134|NM_011605|NP_001073598|NP_001073599|NP_001073600|NP_001073601|NP_001073603|NP_035735
2810021J22Rik	RIKEN cDNA 2810021J22 gene	1.24995	0.0290018	69944_at	69944	ENSMUSG00000020491	NM_172403|NP_765991
1700067K01Rik	RIKEN cDNA 1700067K01 gene	1.25	0.0177664	73453_at	73453	ENSMUSG00000046408	NM_183097|NP_898920
1700012D01Rik	RIKEN cDNA 1700012D01 gene	1.25227	0.0304042	72243_at	72243	NA	XR_105395|XR_106571
A4galt	alpha 1,4-galactosyltransferase	1.25227	0.0320527	239559_at	239559	ENSMUSG00000047878	NM_001004150|NM_001170954|NP_001004150|NP_001164425
Reep3	receptor accessory protein 3	1.25356	0.027458	28193_at	28193	ENSMUSG00000019873	NM_178606|NP_848721
Dpy19l4	dpy-19-like 4 (C. elegans)	1.2544	0.0376545	381510_at	381510	ENSMUSG00000045205	NM_001081201|NP_001074670
Ccdc84	coiled-coil domain containing 84	1.25781	0.0415589	382073_at	382073	ENSMUSG00000043923	NM_201372|NP_958760
Cyld	cylindromatosis (turban tumor syndrome)	1.25818	0.0242845	74256_at	74256	ENSMUSG00000036712	NM_001128169|NM_001128170|NM_001128171|NM_173369|NP_001121641|NP_001121642|NP_001121643|NP_775545
BC024814	cDNA sequence BC024814	1.25905	0.0274394	239706_at	239706	ENSMUSG00000039345	NM_146247|NP_666359
Hint3	histidine triad nucleotide binding protein 3	1.26085	0.0358902	66847_at	66847	ENSMUSG00000019791	NM_025798|NP_080074
Ankrd33b	ankyrin repeat domain 33B	1.26436	0.00257143	67434_at	67434	ENSMUSG00000022237	NM_001164441|NM_026153|NM_027496|NP_001157913|NP_080429|NP_081772
Unc5b	unc-5 homolog B (C. elegans)	1.26576	0.00152283	107449_at	107449	ENSMUSG00000020099	NM_029770|NP_084046
Rabgef1	RAB guanine nucleotide exchange factor (GEF) 1	1.26622	0.0138888	56715_at	56715	ENSMUSG00000025340	NM_001199059|NM_019983|NP_001185988|NP_064367
Mtch2	mitochondrial carrier homolog 2 (C. elegans)	1.26627	0.0294953	56428_at	56428	ENSMUSG00000027282	NM_019758|NP_062732
LOC100504230	hypothetical LOC100504230	1.26656	0.0479679	100504230_at	100504230	NA	XR_105121
Ypel1	yippee-like 1 (Drosophila)	1.26758	0.0362054	106369_at	106369	ENSMUSG00000022773	NM_023249|NP_075738
BC048403	cDNA sequence BC048403	1.26797	0.0269024	270802_at	270802	ENSMUSG00000053684	NM_173022|NP_766610
Ms4a4d	membrane-spanning 4-domains, subfamily A, member 4D	1.27002	0.0126805	66607_at	66607	ENSMUSG00000024678	NM_025658|NP_079934
Ipo5	importin 5	1.27316	0.00523626	70572_at	70572	ENSMUSG00000030662	NM_023579|NP_076068
Hist2h2ac	histone cluster 2, H2ac	1.27353	0.0337414	319176_at	319176	ENSMUSG00000068855	NM_175662|NP_783593
Mrpl47	mitochondrial ribosomal protein L47	1.27417	0.0492814	74600_at	74600	ENSMUSG00000037531	NM_029017|NP_083293
Bckdhb	branched chain ketoacid dehydrogenase E1, beta polypeptide	1.27599	0.00893791	12040_at	12040	ENSMUSG00000032263	NM_199195|NP_954665
Snph	syntaphilin	1.27606	0.0330584	241727_at	241727	ENSMUSG00000027457	NM_198214|NP_937857
Atrnl1	attractin like 1	1.27641	0.00818911	226255_at	226255	ENSMUSG00000054843	NM_181415|NP_852080
Gclc	glutamate-cysteine ligase, catalytic subunit	1.27663	0.0160595	14629_at	14629	ENSMUSG00000032350	NM_010295|NP_034425
2700046G09Rik	RIKEN cDNA 2700046G09 gene	1.27801	0.0266684	67188_at	67188	NA	NR_033198
Nipa1	non imprinted in Prader-Willi/Angelman syndrome 1 homolog (human)	1.27909	0.0154762	233280_at	233280	ENSMUSG00000047037	NM_153578|NP_705806
Olfr117	olfactory receptor 117	1.2793	0.0195412	258263_at	258263	ENSMUSG00000062337	NM_207155|NP_997038
C030044B11Rik	RIKEN cDNA C030044B11 gene	1.28019	0.0306958	68128_at	68128	NA	NR_015601
Gm6033	predicted gene 6033	1.28081	0.0318156	547328_at	547328	NA	NA
Sap30	sin3 associated polypeptide	1.28134	0.0477798	60406_at	60406	ENSMUSG00000031609	NM_021788|NP_068560
Nuak1	NUAK family, SNF1-like kinase, 1	1.28249	0.0437374	77976_at	77976	ENSMUSG00000020032	NM_001004363|NP_001004363
Ostb	organic solute transporter beta	1.28327	0.0106712	330962_at	330962	ENSMUSG00000053862	NM_178933|NP_849264
Med6	mediator of RNA polymerase II transcription, subunit 6 homolog (yeast)	1.28356	0.0286064	69792_at	69792	ENSMUSG00000002679	NM_027213|NP_081489
Tmc7	transmembrane channel-like gene family 7	1.28428	0.0340331	209760_at	209760	ENSMUSG00000042246	NM_172476|NP_766064
Efhc1	EF-hand domain (C-terminal) containing 1	1.28551	0.0438227	71877_at	71877	ENSMUSG00000041809	NM_027974|NP_082250
Efnb2	ephrin B2	1.28718	0.0228352	13642_at	13642	ENSMUSG00000001300	NM_010111|NP_034241
Lrrc51	leucine rich repeat containing 51	1.28768	0.0106356	69358_at	69358	ENSMUSG00000064307	NM_001162973|NM_001162974|NM_027053|NP_001156445|NP_001156446|NP_081329
Apol11b	apolipoprotein L 11b	1.29105	0.0303853	328563_at	328563	ENSMUSG00000091694	NM_001143686|NP_001137158
Hpcal4	hippocalcin-like 4	1.29173	0.0143941	170638_at	170638	ENSMUSG00000046093	NM_174998|NP_778163
Tbc1d19	TBC1 domain family, member 19	1.29258	0.0476959	67249_at	67249	ENSMUSG00000039178	NM_144517|NP_653100
Znrf3	zinc and ring finger 3	1.29339	0.0468223	407821_at	407821	ENSMUSG00000041961	NM_001080924|NP_001074393
Ift57	intraflagellar transport 57 homolog (Chlamydomonas)	1.29412	0.0412474	73916_at	73916	ENSMUSG00000032965	NM_028680|NP_082956
Cdkl2	cyclin-dependent kinase-like 2 (CDC2-related kinase)	1.29475	0.0262962	53886_at	53886	ENSMUSG00000029403	NM_016912|NM_177270|NP_058608|NP_796244
Fbxo32	F-box protein 32	1.29646	0.0228237	67731_at	67731	ENSMUSG00000022358	NM_026346|NP_080622
Casc4	cancer susceptibility candidate 4	1.29986	0.0234332	319996_at	319996	ENSMUSG00000060227	NM_177054|NM_199038|NP_796028|NP_950239
Gabpa	GA repeat binding protein, alpha	1.30194	0.0155833	14390_at	14390	ENSMUSG00000008976	NM_008065|NP_032091
4930518I15Rik	RIKEN cDNA 4930518I15 gene	1.3021	0.0361342	74704_at	74704	NA	XR_104749
2610528A11Rik	RIKEN cDNA 2610528A11 gene	1.30678	0.0301836	70045_at	70045	NA	XR_105647|XR_106843
Xpa	xeroderma pigmentosum, complementation group A	1.30694	0.0492466	22590_at	22590	ENSMUSG00000028329	NM_011728|NP_035858
Gem	GTP binding protein (gene overexpressed in skeletal muscle)	1.30802	0.0337237	14579_at	14579	ENSMUSG00000028214	NM_010276|NP_034406
Atg10	autophagy-related 10 (yeast)	1.3082	0.00309052	66795_at	66795	ENSMUSG00000021619	NM_025770|NP_080046
3110009E18Rik	RIKEN cDNA 3110009E18 gene	1.30981	0.0191386	73103_at	73103	ENSMUSG00000026388	NM_001172074|NM_028439|NP_001165545|NP_082715
9430091E24Rik	RIKEN cDNA 9430091E24 gene	1.31023	0.000380326	434350_at	434350	NA	XR_106174
Prr9	proline rich 9	1.31418	0.00645946	109314_at	109314	ENSMUSG00000056270	NM_175424|NP_780633
Tlr4	toll-like receptor 4	1.31459	0.0175581	21898_at	21898	ENSMUSG00000039005	NM_021297|NP_067272
Il13ra1	interleukin 13 receptor, alpha 1	1.31641	0.0252851	16164_at	16164	ENSMUSG00000017057	NM_133990|NP_598751
Ccdc50	coiled-coil domain containing 50	1.31687	0.0100712	67501_at	67501	ENSMUSG00000038127	NM_001025615|NM_026202|NP_001020786|NP_080478
Gpr133	G protein-coupled receptor 133	1.31688	0.0373306	243277_at	243277	ENSMUSG00000044017	NM_001081342|NP_001074811
Gm9803	predicted gene 9803	1.31774	0.0172154	100042179_at	100042179	ENSMUSG00000014301	XM_001477683|XM_003085679|XP_001477733|XP_003085727
Znhit3	zinc finger, HIT type 3	1.31781	0.039005	448850_at	448850	ENSMUSG00000020526	NM_001005223|NP_001005223
Pla2g7	phospholipase A2, group VII (platelet-activating factor acetylhydrolase, plasma)	1.32004	0.0369956	27226_at	27226	ENSMUSG00000023913	NM_013737|NP_038765
Srfbp1	serum response factor binding protein 1	1.32201	0.00686201	67222_at	67222	ENSMUSG00000024528	NM_026040|NP_080316
Cyfip2	cytoplasmic FMR1 interacting protein 2	1.32232	0.0208271	76884_at	76884	ENSMUSG00000020340	NM_133769|NP_598530
Plk1s1	polo-like kinase 1 substrate 1	1.32414	0.00784289	228730_at	228730	ENSMUSG00000074749	NM_001033298|NP_001028470
Rab27b	RAB27b, member RAS oncogene family	1.32761	0.0139641	80718_at	80718	ENSMUSG00000024511	NM_001082553|NM_030554|NP_001076022|NP_085031
Hoxd9	homeobox D9	1.33242	0.0131626	15438_at	15438	ENSMUSG00000043342	NM_013555|NP_038583
Dkc1	dyskeratosis congenita 1, dyskerin homolog (human)	1.33389	0.0179486	245474_at	245474	ENSMUSG00000031403	NM_001030307|NP_001025478
Hist1h2ae	histone cluster 1, H2ae	1.33505	0.032237	319166_at	319166	ENSMUSG00000069272	NM_178187|NP_835494
Sostdc1	sclerostin domain containing 1	1.33759	0.010165	66042_at	66042	ENSMUSG00000036169	NM_025312|NP_079588
Colec12	collectin sub-family member 12	1.3387	0.0111074	140792_at	140792	ENSMUSG00000036103	NM_130449|NP_569716
Flt3	FMS-like tyrosine kinase 3	1.33877	0.00917787	14255_at	14255	ENSMUSG00000042817	NM_010229|NP_034359
Arhgap22	Rho GTPase activating protein 22	1.33896	0.00443686	239027_at	239027	ENSMUSG00000063506	NM_153800|NP_722495
Denr	density-regulated protein	1.34055	0.0431539	68184_at	68184	ENSMUSG00000023106	NM_026603|NP_080879
Rgs4	regulator of G-protein signaling 4	1.34667	0.0030637	19736_at	19736	ENSMUSG00000038530	NM_009062|NP_033088
Rimklb	ribosomal modification protein rimK-like family member B	1.34969	0.040427	108653_at	108653	ENSMUSG00000040649	NM_027664|NP_081940
Amica1	adhesion molecule, interacts with CXADR antigen 1	1.34976	0.0301583	270152_at	270152	ENSMUSG00000048534	NM_001005421|NP_001005421
Ikbip	IKBKB interacting protein	1.35125	0.0238537	67454_at	67454	ENSMUSG00000019975	NM_026166|NM_027078|NP_080442|NP_081354
Ropn1l	ropporin 1-like	1.35184	0.0364646	252967_at	252967	ENSMUSG00000022236	NM_145852|NP_665851
Ndufaf2	NADH dehydrogenase (ubiquinone) 1 alpha subcomplex, assembly factor 2	1.35228	0.0243138	75597_at	75597	ENSMUSG00000068184	NM_001127346|NP_001120818
Tmem178	transmembrane protein 178	1.35449	0.0424289	68027_at	68027	ENSMUSG00000024245	NM_026516|NP_080792
Atp8b3	ATPase, class I, type 8B, member 3	1.35735	0.000285387	67331_at	67331	ENSMUSG00000003341	NM_026094|NP_080370
Irgm1	immunity-related GTPase family M member 1	1.35773	0.0108881	15944_at	15944	ENSMUSG00000046879	NM_008326|NP_032352
Popdc3	popeye domain containing 3	1.35806	0.0418933	78977_at	78977	ENSMUSG00000019848	NM_024286|NP_077248
2010320M18Rik	RIKEN cDNA 2010320M18 gene	1.35901	0.0104499	72093_at	72093	NA	NR_029440
St8sia2	ST8 alpha-N-acetyl-neuraminide alpha-2,8-sialyltransferase 2	1.35985	0.00212111	20450_at	20450	ENSMUSG00000025789	NM_009181|NP_033207
1500011H22Rik	RIKEN cDNA 1500011H22 gene	1.36225	0.0179399	68948_at	68948	ENSMUSG00000029463	NM_026883|NP_081159
Ankle2	ankyrin repeat and LEM domain containing 2	1.36344	0.00743426	71782_at	71782	ENSMUSG00000029501	NM_027922|NP_082198
Cd55	CD55 antigen	1.36922	0.0326614	13136_at	13136	ENSMUSG00000026399	NM_010016|NP_034146
Gnpda2	glucosamine-6-phosphate deaminase 2	1.37017	0.0386649	67980_at	67980	ENSMUSG00000029209	NM_001038015|NP_001033104
Ddx6	DEAD (Asp-Glu-Ala-Asp) box polypeptide 6	1.37377	0.0367419	13209_at	13209	ENSMUSG00000032097	NM_001110826|NM_007841|NM_181324|NP_001104296|NP_031867|NP_851841
Gtpbp4	GTP binding protein 4	1.37454	0.0371499	69237_at	69237	ENSMUSG00000021149	NM_027000|NP_081276
1110059E24Rik	RIKEN cDNA 1110059E24 gene	1.37479	0.00741493	66206_at	66206	ENSMUSG00000035171	NM_025423|NP_079699
Bend6	BEN domain containing 6	1.37695	0.000892928	320705_at	320705	ENSMUSG00000042182	NM_177235|NP_796209
Serpinb6c	serine (or cysteine) peptidase inhibitor, clade B, member 6c	1.37795	0.0394784	97848_at	97848	ENSMUSG00000052180	NM_148942|NP_683744
Fndc3c1	fibronectin type III domain containing 3C1	1.38868	0.031242	333564_at	333564	ENSMUSG00000033737	NM_001007580|NP_001007581
Arhgap26	Rho GTPase activating protein 26	1.38955	0.0377382	71302_at	71302	ENSMUSG00000036452	NM_175164|NP_780373
Slc25a31	solute carrier family 25 (mitochondrial carrier; adenine nucleotide translocator), member 31	1.39367	0.00282872	73333_at	73333	ENSMUSG00000069041	NM_178386|NP_848473
Tnpo3	transportin 3	1.3993	0.000993362	320938_at	320938	ENSMUSG00000012535	NM_177296|NP_796270
Wdr13	WD repeat domain 13	1.39954	0.0140939	73447_at	73447	ENSMUSG00000031166	NM_026137|NP_080413|NR_029428
Whamm	WAS protein homolog associated with actin, golgi membranes and microtubules	1.4044	0.000604691	434204_at	434204	ENSMUSG00000045795	NM_001004185|NP_001004185
Smc1a	structural maintenance of chromosomes 1A	1.40934	0.0193162	24061_at	24061	ENSMUSG00000041133	NM_019710|NP_062684
Neurog2	neurogenin 2	1.41243	0.00901675	11924_at	11924	ENSMUSG00000027967	NM_009718|NP_033848
LOC100503842	hypothetical protein LOC100503842	1.41663	0.0383605	100503842_at	100503842	NA	XM_003085006|XM_003085924|XP_003085054|XP_003085972
Zbed6	zinc finger, BED domain containing 6	1.41905	0.00651236	667118_at	667118	ENSMUSG00000094410	NM_001166552|NP_001160024
Apbb1	amyloid beta (A4) precursor protein-binding, family B, member 1	1.44146	0.00111782	11785_at	11785	ENSMUSG00000037032	NM_009685|NP_033815
Pdgfrl	platelet-derived growth factor receptor-like	1.44381	0.000208407	68797_at	68797	ENSMUSG00000031595	NM_026840|NP_081116
Fam118a	family with sequence similarity 118, member A	1.44851	0.0192796	73225_at	73225	ENSMUSG00000022434	NM_133750|NM_177067|NP_598511|NP_796041
Phf20	PHD finger protein 20	1.45114	0.0232927	228829_at	228829	ENSMUSG00000038116	NM_172674|NP_766262
Vdr	vitamin D receptor	1.47096	0.0339695	22337_at	22337	ENSMUSG00000022479	NM_009504|NP_033530
Nubpl	nucleotide binding protein-like	1.47103	0.0395773	76826_at	76826	ENSMUSG00000035142	NM_029760|NP_084036
Oxct2a	3-oxoacid CoA transferase 2A	1.47113	0.00364275	64059_at	64059	ENSMUSG00000076436	NM_022033|NP_071316
Tmem14a	transmembrane protein 14A	1.47801	0.0225756	75712_at	75712	ENSMUSG00000025933	NM_029398|NP_083674
Ccdc41	coiled-coil domain containing 41	1.48012	0.0376616	77048_at	77048	ENSMUSG00000020024	NM_029852|NP_084128
Spn	sialophorin	1.48089	1.50103e-05	20737_at	20737	ENSMUSG00000051457	NM_001037810|NM_009259|NP_001032899|NP_033285
Pgf	placental growth factor	1.4954	0.0145636	18654_at	18654	ENSMUSG00000004791	NM_008827|NP_032853
0610040B10Rik	RIKEN cDNA 0610040B10 gene	1.50849	0.00448795	67672_at	67672	NA	NR_027874
Edn2	endothelin 2	1.51732	0.0468938	13615_at	13615	ENSMUSG00000028635	NM_007902|NP_031928
Fgfbp3	fibroblast growth factor binding protein 3	1.52415	0.00487332	72514_at	72514	ENSMUSG00000047632	NM_028263|NP_082539
Adamts15	a disintegrin-like and metallopeptidase (reprolysin type) with thrombospondin type 1 motif, 15	1.52503	0.00572929	235130_at	235130	ENSMUSG00000033453	NM_001024139|NP_001019310
Cyp17a1	cytochrome P450, family 17, subfamily a, polypeptide 1	1.5709	0.0030702	13074_at	13074	ENSMUSG00000003555	NM_007809|NP_031835
Prl5a1	prolactin family 5, subfamily a, member 1	1.61497	0.024705	28078_at	28078	ENSMUSG00000017064	NM_023746|NP_076235
Sult1e1	sulfotransferase family 1E, member 1	1.61728	0.00607357	20860_at	20860	ENSMUSG00000029272	NM_023135|NP_075624
Abca13	ATP-binding cassette, sub-family A (ABC1), member 13	1.62866	0.0009548	268379_at	268379	ENSMUSG00000004668	NM_178259|NP_839990
Calm4	calmodulin 4	1.63242	1.44709e-05	80796_at	80796	ENSMUSG00000033765	NM_020036|NP_064420
1110054O05Rik	RIKEN cDNA 1110054O05 gene	1.64625	0.00288124	66209_at	66209	ENSMUSG00000038544	NM_001013577|NP_001013595
Ptgs2	prostaglandin-endoperoxide synthase 2	1.65582	0.0461572	19225_at	19225	ENSMUSG00000032487	NM_011198|NP_035328
Vcan	versican	1.81764	0.0410471	13003_at	13003	ENSMUSG00000021614	NM_001081249|NM_001134474|NM_001134475|NM_019389|NM_172955|NP_001074718|NP_001127946|NP_001127947|NP_062262|NP_766543
Lrrn4	leucine rich repeat neuronal 4	1.98837	0.00128059	320974_at	320974	ENSMUSG00000043110	NM_177303|NP_796277

## Sheet: Supplementary Table 5
Supplementatry Table 5: List of genes encoding transcription factors differentially expressed in the placenta in reponse to low maternal folate. Genes were considered to be significantly differentially expressed in response to low maternal folate if (a) the p value for t-test between dietary groups was < 0.05 and (b) if there was a fold change of ±1.2.
Gene symbol	Fold Change	P Value
AHR	-1.43422	0.0171225
GABPA	1.30194	0.0155833
HNF4A	-1.28743	0.011334
HOXD9	1.33242	0.0131626
KLF8	1.20968	0.0195847
MED15	-1.23987	0.00463467
MED6	1.28356	0.0286064
NEUROG2	1.41243	0.00901675
NFE2L3	-1.28123	0.020707
NR4A1	-1.23001	0.0186644
PPARD	-1.34098	0.0195625
SAP30	1.28134	0.0477798
SEC16B	-1.28567	0.0143716
SOX13	-1.29162	0.00867259
STAT5B	-1.2186	0.0294777
TBC1D2B	-1.27537	0.0388107
VDR	1.47096	0.0339695
ZDHHC5	-1.35671	0.00963731
ZFP128	-1.23697	0.0200171
ZFP143	-1.30497	0.0310293
ZFPM1	-1.37274	0.00914723
ZNHIT3	1.31781	0.039005

## Sheet: Supplementary Table 6
Supplementary Table 6. Lists of genes found in in common with other published data sets. Genes found to be differentially expressed in response to maternal folate depletion in the fetal liver were compared to other published gene lists where diets low in folate were reported to alter gene expression in the liver.
McKay et al vs Champier et al	McKay et al vs Glen et al BALB/c mice	McKay et al vs Glen et al CBA/Ca mice	McKay et al vs Chen et al
FCGR2B	ACOT2	5430407P10RIK	AADAT
FPGS	AKR1B8	ACOT2	ABCC9
GNAI3	ANXA3	ADAMTS9	ABHD12
RETSAT	APRT	ANXA3	ABHD5
	BASP1	APRT	ACOT2
	CAPN6	ARHGAP30	ACSF3
	CCND1	ATP11A	ADAM26A
	CD200	BASP1	ADAMTS9
	CD200R1	CACNA2D1	ADPGK
	CD34	CAPN6	AGMAT
	CD68	CASQ2	AGPHD1
	CDH3	CCND1	AGXT
	CDKN3	CD68	AKAP2
	CHI3L1	CDH3	AKAP5
	CKAP2	CDKN3	AKR1B8
	CLIC3	CHI3L1	ALDH3B1
	COL1A2	CKAP2	ALKBH6
	COL3A1	COL1A2	ANKAR
	COL6A2	COL3A1	ANKS4B
	COL6A3	COL6A2	AOX3
	CSTB	COL6A3	AP3M1
	DCTD	CSTB	AQP1
	DPT	DCTD	AQP8
	EEF1A2	ENTPD2	ARHGAP18
	ENTPD2	FARS2	ARSG
	FANCB	FBN1	ASGR1
	FARS2	FBN2	ATP11A
	FBN1	FETUB	ATP12A
	FETUB	FOXQ1	ATRNL1
	FSTL1	FSTL1	AVPI1
	GABRR2	GNMT	B3GALNT1
	GLIPR1	H2-DMA	BAMBI
	GM885	HAAO	BCKDHA
	GPR110	HES6	BGN
	H2-DMA	HKDC1	BHLHE40
	HAAO	HUNK	BHMT2
	HCLS1	IER3	C8B
	HUNK	IL1F9	CAV2
	IER3	IL1RAP	CBX6
	IL1F9	IL7R	CD19
	IL1RAP	IRF8	CD82
	IL7R	JUB	CDH11
	INSL6	LPIN1	CDK10
	IRF8	LTBP2	CDK5RAP3
	JUB	LUM	CES1E
	KCNAB2	MAFF	CGRRF1
	LTBP2	MAP3K13	CHCHD5
	LTBP3	MYCN	CISH
	LUM	MYOM1	CLIC3
	NFKB2	NFKB2	COL6A2
	NUDT18	NOL3	COQ7
	OXCT1	NUCB2	CRH
	PECR	NUDT18	CRP
	PLXDC2	OXCT1	CRYBG3
	POSTN	OXCT2A	CSTA
	PPIC	PGM3	CSTB
	PRR11	PLEKHB2	CYP4V3
	PTGFRN	POSTN	DCTD
	PTPRN2	PPIC	DDRGK1
	RECK	PRLR	DNAJB11
	RHBDF1	PRR11	DNAJB2
	RHOH	PTGFRN	DNASE2B
	RSAD2	RECK	DNMT3A
	RUNX3	RHBDF1	DPT
	SAA3	RHOH	DYNC1LI2
	SAMD4	RNF122	EBP
	SCD1	RUNX3	EDEM2
	SERPINA3G	SAA3	EIF5
	SERPINE1	SAMD4	ELK3
	SERPINE2	SELM	ELP2
	SGCB	SERPINA3G	ENPP4
	SLC15A3	SERPINE1	ENTPD2
	SLC30A10	SHH	EPB4.1L2
	SLC34A2	SLC13A3	EPHA4
	SLC39A4	SLC15A3	ERGIC3
	SLC39A5	SLC30A10	ETHE1
	SLC41A3	SLC34A2	ETNK2
	SLPI	SLC39A5	FAAH
	SOAT1	SLC41A3	FAHD1
	SORCS2	SLPI	FAIM
	SPARCL1	SORCS2	FCNB
	SPHK1	SPARCL1	FETUB
	SUSD2	TGFB2	FIGN
	TMIE	TGM1	FMOD
	TPM4	TMIE	FNBP1L
	TRPM5	TPM4	FOXQ1
	VIM	TRPM5	GALNTL4
	VNN3	TSC22D3	GANAB
	WAS	VIM	GBA
		WAS	GJB1
			GJB2
			GLTPD2
			GM2A
			GPD1L
			GPR115
			GPR146
			GPS2
			GPX8
			GSTM6
			GSTT3
			H6PD
			HACL1
			HAGH
			HAMP
			HES6
			HFE
			HINT2
			HP
			HRC
			IGF1
			IGSF10
			IL1R1
			IL7R
			INSC
			IRS2
			ISG20
			ITIH1
			ITPKA
			JUB
			KHK
			KLHL25
			LGALS3BP
			LIMCH1
			LMO7
			LTBP2
			MAGED2
			MAP4K1
			MBL1
			MCART1
			MED19
			MEF2C
			METTL9
			MPZL2
			MTERF
			MVK
			NAGA
			NAGS
			NANS
			NENF
			NID2
			NLE1
			NLRX1
			NME6
			NR1H2
			NR1H4
			NR2C1
			NUCB2
			OGN
			OS9
			OXCT1
			P4HA2
			PADI4
			PARP6
			PCDH17
			PCOLCE2
			PDGFRA
			PDPN
			PDZK1
			PECR
			PEO1
			PFKFB1
			PLA2G12A
			PLCE1
			PLEKHB2
			PLEKHG1
			PLIN5
			PODXL
			POU2AF1
			PRKD3
			PRLR
			PRTG
			PXMP4
			RAB40B
			RALA
			RAP2A
			RASD2
			RCE1
			RHBDD1
			RHBDF1
			RHOBTB3
			RND3
			ROPN1
			RPS27
			RUNX3
			SCN7A
			SEC14L2
			SELM
			SEPX1
			SERPINE1
			SIGMAR1
			SLAMF1
			SLC15A3
			SLC22A18
			SLC25A22
			SLC25A44
			SLC27A5
			SLC30A10
			SLC37A4
			SLC38A5
			SLC39A4
			SLC39A5
			SLC41A1
			SLC41A3
			SLC6A13
			SLCO2A1
			SLIT2
			SLPI
			SMAP2
			SMURF2
			SORCS2
			SSR3
			STAP2
			STARD5
			STAT5A
			SUSD2
			TAPBPL
			TARDBP
			TBC1D10B
			TFPI
			THNSL2
			TJP1
			TMEM120A
			TMEM186
			TMEM86B
			TMIE
			TNNC2
			TNS3
			TTC36
			TUFT1
			UBXN6
			ULK1
			VEZT
			VNN3
			VTN
			WBP2
			WSB1
			ZFP68
			ZFP799
